# Supplementary material for: Efficacy and safety of non-steroidal anti-inflammatory drugs (NSAIDs) for the treatment of acute pain after orthopedic trauma: a practice management guideline from the Eastern Association for the Surgery of Trauma and the Orthopedic Trauma Association
Source: HighWire-hosted journal article supplement (doi:10.1136/tsaco-2022-001056), 2023-02-01
Supplement: tsaco-2022-001056supp001_data_supplement.pdf [file tsaco-2022-001056supp001_data_supplement.pdf]

**Supplement 1 – Search Strategies**

**Librarian searcher:** Sarah Cantrell, MLIS; Duke University Medical Center Library & Archives; Duke University School of Medicine

**Database:** MEDLINE (via Ovid; Ovid MEDLINE(R) ALL 1946 to March 18, 2020)

Original search date: 3/19/2020

| Search Set           | Search Strategy                                                                                                                                                                                                                                                                                                                                                                                                                                                                                                                                                                                                                                                                                                                                                                                                                                                                                                                                                                                                                                                                                                                                                                                                                                                                                                                                                                                                                                                                                                                                                                                                                                                                                                                                                                                                                                                                                                                                                                                                                                                                                                                                                                                                                                                                                                                                                                                                                                                                                                                                                                                                                                                                                                                                      | Results |
|----------------------|------------------------------------------------------------------------------------------------------------------------------------------------------------------------------------------------------------------------------------------------------------------------------------------------------------------------------------------------------------------------------------------------------------------------------------------------------------------------------------------------------------------------------------------------------------------------------------------------------------------------------------------------------------------------------------------------------------------------------------------------------------------------------------------------------------------------------------------------------------------------------------------------------------------------------------------------------------------------------------------------------------------------------------------------------------------------------------------------------------------------------------------------------------------------------------------------------------------------------------------------------------------------------------------------------------------------------------------------------------------------------------------------------------------------------------------------------------------------------------------------------------------------------------------------------------------------------------------------------------------------------------------------------------------------------------------------------------------------------------------------------------------------------------------------------------------------------------------------------------------------------------------------------------------------------------------------------------------------------------------------------------------------------------------------------------------------------------------------------------------------------------------------------------------------------------------------------------------------------------------------------------------------------------------------------------------------------------------------------------------------------------------------------------------------------------------------------------------------------------------------------------------------------------------------------------------------------------------------------------------------------------------------------------------------------------------------------------------------------------------------------|---------|
| #1<br><i>NSAIDs</i>  | exp Anti-Inflammatory Agents, Non-Steroidal/ or exp Diclofenac/ or exp Apazone/ or exp Aspirin/ or exp Celecoxib/ or exp Ibuprofen/ or exp Diclofenac/ or exp Diflunisal/ or exp Etodolac/ or exp Fenoprofen/ or exp Flufenamic Acid/ or exp Indomethacin/ or exp Ketoprofen/ or exp Ketorolac/ or exp Meclofenamic Acid/ or exp Mefenamic Acid/ or exp Meloxicam/ or exp Nabumetone/ or exp Naproxen/ or exp Nefopam/ or exp Oxaprozin/ or exp Piroxicam/ or exp Phenylbutazone/ or exp Sulindac/ or exp Tolmetin/ or ("nonsteroid antiinflammatory agents" or "nonsteroid antiinflammatory agent" or "nonsteroid anti-inflammatory agents" or "nonsteroid anti-inflammatory agent" or "non-steroid antiinflammatory agents" or "non-steroid antiinflammatory agent" or "non-steroid anti-inflammatory agents" or "non-steroid anti-inflammatory agent" or "nonsteroidal antiinflammatory agents" or "nonsteroidal antiinflammatory agent" or "nonsteroidal anti-inflammatory agents" or "nonsteroidal anti-inflammatory agent" or "non-steroidal antiinflammatory agents" or "non-steroidal anti-inflammatory agents" or "non-steroidal antiinflammatory agent" or "non-steroidal anti-inflammatory agents" or "non-steroidal anti-inflammatory agent" or "nonsteroid antiinflammatory drugs" or "nonsteroid antiinflammatory drug" or "nonsteroid anti-inflammatory drugs" or "nonsteroid anti-inflammatory drug" or non-steroid antiinflammatory drugs or "non-steroid antiinflammatory drug" or "non-steroid anti-inflammatory drugs" or "non-steroid anti-inflammatory drug" or "nonsteroidal antiinflammatory drugs" or "nonsteroidal antiinflammatory drug" or "nonsteroidal anti-inflammatory drugs" or "nonsteroidal anti-inflammatory drug" or "non-steroidal antiinflammatory drugs" or "nonsteroidal anti-inflammatory drug" or "non-steroidal anti-inflammatory drugs" or "non-steroidal anti-inflammatory drug" or NSAID or NSAIDs or apazone or aspirin or "acetylsalicylic acid" or "salicylic acid" or salsalate or bromfenac or celecoxib or Celebrex or dexibuprofen or dexketoprofen or diclofenac or voltaren or aceclofenac or diflunisal or droxicam or etodolac or etoricoxib or fenoprofen or "flufenamic acid" or flurbiprofen or ibuprofen or ibuprofen or advil or motrin or indomethacin or indomethacin or Indocin or ketoprofen or ketorolac or toradol or loxoprofen or "Meclofenamate sodium" or "mefenamic acid" or "meclofenamic acid" or meloxicam or nabumetone or naproxen or aleve or anaprox or naprelan or naprosyn or nefopam or nimesulide or oxaprozin or parecoxib or piroxicam or phenylbutazone or salsalate or sulindac or tenoxicam or "tiaprofenic acid" or "tolfenamic acid" or tolmetin).ti,ab. | 264911  |
| #2<br><i>Opioids</i> | exp Analgesics, Opioid/ or exp Alfentanil/ or exp Alphaprodine/ or exp Butorphanol/ or exp Buprenorphine, Naloxone Drug Combination/ or exp Codeine/ or exp Dextromoramide/ or exp                                                                                                                                                                                                                                                                                                                                                                                                                                                                                                                                                                                                                                                                                                                                                                                                                                                                                                                                                                                                                                                                                                                                                                                                                                                                                                                                                                                                                                                                                                                                                                                                                                                                                                                                                                                                                                                                                                                                                                                                                                                                                                                                                                                                                                                                                                                                                                                                                                                                                                                                                                   | 231791  |

|  |                                                                                                                                                                                                                                                                                                                                                                                                                                                                                                                                                                                                                                                                                                                                                                                                                                                                                                                                                                                                                                                                                                                                                                                                                                                                                                                                                                                                                                                                                                                                                                                                                                                                                                                                                                                                                                                                                                                                                                                                                                                                                                                                                                                                                                                                                                                                                                                                                                                                                                                                                                                                                                                                                                                                                                                                                                                                                                                                                                                                                                                                                                                                                                                                                                                                                                                                                                                                                                                                                                       |  |
|--|-------------------------------------------------------------------------------------------------------------------------------------------------------------------------------------------------------------------------------------------------------------------------------------------------------------------------------------------------------------------------------------------------------------------------------------------------------------------------------------------------------------------------------------------------------------------------------------------------------------------------------------------------------------------------------------------------------------------------------------------------------------------------------------------------------------------------------------------------------------------------------------------------------------------------------------------------------------------------------------------------------------------------------------------------------------------------------------------------------------------------------------------------------------------------------------------------------------------------------------------------------------------------------------------------------------------------------------------------------------------------------------------------------------------------------------------------------------------------------------------------------------------------------------------------------------------------------------------------------------------------------------------------------------------------------------------------------------------------------------------------------------------------------------------------------------------------------------------------------------------------------------------------------------------------------------------------------------------------------------------------------------------------------------------------------------------------------------------------------------------------------------------------------------------------------------------------------------------------------------------------------------------------------------------------------------------------------------------------------------------------------------------------------------------------------------------------------------------------------------------------------------------------------------------------------------------------------------------------------------------------------------------------------------------------------------------------------------------------------------------------------------------------------------------------------------------------------------------------------------------------------------------------------------------------------------------------------------------------------------------------------------------------------------------------------------------------------------------------------------------------------------------------------------------------------------------------------------------------------------------------------------------------------------------------------------------------------------------------------------------------------------------------------------------------------------------------------------------------------------------------------|--|
|  | <p>Dextropropoxyphene/ or exp Dihydromorphine/ or exp Diphenoxylate/ or exp Ethylketocyclazocine/ or exp Ethylmorphine/ or exp Fentanyl/ or exp Heroin/ or exp Hydrocodone/ or exp Levorphanol/ or exp Meperidine/ or exp Meptazinol/ or exp Methadone/ or exp Methadyl Acetate/ or exp Morphine/ or exp Nalbuphine/ or exp Opiate Alkaloids/ or exp Opium/ or exp Oxycodone/ or exp Oxymorphone/ or exp Pentazocine/ or exp Phenazocine/ or exp Phenoperidine/ or exp Pirinitramide/ or exp Promedol/ or exp Remifentanil/ or exp Sufentanil/ or exp Tapentadol/ or exp Tilidine/ or exp Tramadol/ or (Opioid or Opioids or Opiate or Opiates or Narcotic or Narcotics or Dihydroetorphine or Vicodin or acrylfentanyl or alfentanil or alphaprodine or "beta-casomorphin" or "beta-casomorphins" or Butorphanol or Beforal or Moradol or Stadol or Torbugesic or Dolorex or "Buprenorphine Naloxone" or Suboxone or carfentanil or Codeine or Ardinex or Isocodeine or crotonylfentanyl or cyclopropylfentanyl or deltorphin or dermorphin or desomorphine or krokodil or Dextromoramide or Pyrrolamidol or "D-Moramide" or Palfium or Dextropropoxyphene or Propoxyphene or Darvon or dezocine or dihydrocodeine or paramol or Rikodeine or Tiamon or Tosidrin or Contugesic or Dicodin or Paracodin or Paracodina or Dihydromorphine or Paramorfan or Paramorphan or Diphenoxylate or dynorphin or dynorphins or dinorphin or dinorphins or endomorphin or Enkephalin or eseroline or Ethylketocyclazocine or Ethylmorphine or Trachyl or Dionine or Etorphine or Ethorphine or Fentanyl or Phentanyl or Fentanest or Sublimaze or Duragesic or Durogesic or Fentora or Heroin or Diacetylmorphine or Diamorphine or Diagesil or Diamorf or Hydrocodone or Hydrocodon or Dihydrocodeinone or Dicodid or Robidone or Hydrocon or Codinovo or Hycodan or Hycon or Hydromorphone or Dihydromorphinone or Hydromorphon or Palladone or Laudacon or Dilaudid or ketobemidone or cetobemidon or Levorphanol or levodroman or levorphan or levorphanol or lofentanil or lofentanyl or Meperidine or Pethidine or Isonipeccain or Dolsin or Dolosal or Dolin or Operidine or Dolantin or Dolargan or Lidol or Lydol or Demerol or Dolcontral or Meptazinol or Metid or Methadone or Biodone or Dolophine or Metadol or Metasedin or Symoron or Methadose or Methex or Phenadone or Physeptone or Phymet or Pinadone or Amidone or Acetylmethadol or Alphacetylmethadol or Amidolacetate or Dimepheptanol or Levoacetylmethadol or Methadol or Acemethadone or Levomethadyl or Morphine or Morphia or "MS Contin" or Oramorph or Duramorph or Nalbuphine or Nubain or nocistatin or normethadone or Opium or Papaveretum or Omnopon or Pantopon or Oxycodone or Dihydrone or Oxycone or Dihydrohydroxycodone or Oxycodone or Eucodal or Theocodin or Oxycontin or Pancodine or Dinarkon or Oxiconum or Oxymorphone or Numorphan or Opana or paracymethadol or noracetylmethadol or Pentazocine or Lexir or Talwin or Fortral or Phenazocine or Phenethylazocine or Phenbenzorphin or Narphen or Phenoperidine or Fenoperidine or Lealgin or Operidine or Pirinitramide or Piritramid or Dipidolor or Dipydolor or Promedol or Dimethylmeperidine or Trimeperidine or Isopromedol or protopine or fumarine or Remifentanil or Ultiva or Sufentanil or Sulfentanyl or Sulfentanil or Sufenta or Tapentadol or Nucynta or Tilidine or Tilidate or Tilidin or Valoron or Valerone or Tramadol or Tramundin</p> |  |
|--|-------------------------------------------------------------------------------------------------------------------------------------------------------------------------------------------------------------------------------------------------------------------------------------------------------------------------------------------------------------------------------------------------------------------------------------------------------------------------------------------------------------------------------------------------------------------------------------------------------------------------------------------------------------------------------------------------------------------------------------------------------------------------------------------------------------------------------------------------------------------------------------------------------------------------------------------------------------------------------------------------------------------------------------------------------------------------------------------------------------------------------------------------------------------------------------------------------------------------------------------------------------------------------------------------------------------------------------------------------------------------------------------------------------------------------------------------------------------------------------------------------------------------------------------------------------------------------------------------------------------------------------------------------------------------------------------------------------------------------------------------------------------------------------------------------------------------------------------------------------------------------------------------------------------------------------------------------------------------------------------------------------------------------------------------------------------------------------------------------------------------------------------------------------------------------------------------------------------------------------------------------------------------------------------------------------------------------------------------------------------------------------------------------------------------------------------------------------------------------------------------------------------------------------------------------------------------------------------------------------------------------------------------------------------------------------------------------------------------------------------------------------------------------------------------------------------------------------------------------------------------------------------------------------------------------------------------------------------------------------------------------------------------------------------------------------------------------------------------------------------------------------------------------------------------------------------------------------------------------------------------------------------------------------------------------------------------------------------------------------------------------------------------------------------------------------------------------------------------------------------------------|--|

|                               |                                                                                                                                                                                                                                                                                                                                                                                                                                                                                                                                                                                                                                                                                                                                                                                                                                                                                                                                                                                                                                                                                                                                                                                                                                                                                                                                                                                                                     |         |
|-------------------------------|---------------------------------------------------------------------------------------------------------------------------------------------------------------------------------------------------------------------------------------------------------------------------------------------------------------------------------------------------------------------------------------------------------------------------------------------------------------------------------------------------------------------------------------------------------------------------------------------------------------------------------------------------------------------------------------------------------------------------------------------------------------------------------------------------------------------------------------------------------------------------------------------------------------------------------------------------------------------------------------------------------------------------------------------------------------------------------------------------------------------------------------------------------------------------------------------------------------------------------------------------------------------------------------------------------------------------------------------------------------------------------------------------------------------|---------|
|                               | or biodalgic or Jutadol or Nobligan or Prontofort or Zytram or Takadol or Theradol or Tiral or Topalgic or Tradol or Tradolpuren or Tradonal or Tralgiol or Trama or TramaDorsch or Biokanol or Tramabeta or Tramadin or Tramadoc or Ranitidin or Trasedal or Ultram or Xymel or Zamudol or Zumalgic or Zydol or Tramadura or Tramagetic or Tramagit or Tramake or Tramal or Tramex or Adolonta or Contramal or Amadol or Skudexa Abstral or Actiq or Anexsia or Avinza or Butrans or co-gesic or Demerol or Dolophine or embeda or Exalgo or Fentora or hycet or hydromet or Hysingla or Kadian or liquicet or Lorcet or Lortab or Norco or Nucynta or Onsolis or Oramorph or oxycet or Oxaydo or Oxycontin or Percocet or Percodan or rezira or Roxanol or Roxicet or sublimaze or targiniq or tussionex or tuzistra or xtampza or Vicodin or vicoprofen or vituz or xartemis or xodol or Zohydro or zolvit or zutripro or zydone).ti,ab.                                                                                                                                                                                                                                                                                                                                                                                                                                                                         |         |
| #3                            | 1 or 2                                                                                                                                                                                                                                                                                                                                                                                                                                                                                                                                                                                                                                                                                                                                                                                                                                                                                                                                                                                                                                                                                                                                                                                                                                                                                                                                                                                                              | 484822  |
| #4<br><i>Ortho procedures</i> | exp Orthopedic Procedures/ or exp Ulnar Collateral Ligament Reconstruction/ or exp Acetabuloplasty/ or exp Amputation/ or exp Disarticulation/ or exp Hemipelvectomy/ or exp Arthrodesis/ or exp Arthroplasty/ or exp Anterior Cruciate Ligament Reconstruction/ or exp Bone-Patellar Tendon-Bone Grafting/ or exp Arthroplasty, Subchondral/ or exp Posterior Cruciate Ligament Reconstruction/ or exp Arthroscopy/ or exp Joint Capsule Release/ or exp Bone lengthening/ or exp Ilizarov Technique/ or exp Osteogenesis, Distraction/ or exp Bone Transplantation/ or exp Fracture Fixation/ or exp Closed fracture reduction/ or exp Fracture Fixation, Internal/ or exp Open fracture reduction/ or exp Limb salvage/ or exp Meniscectomy/ or exp Osteotomy/ or exp Alveolar Bone Grafting/ or exp Tenodesis/ or exp Tenotomy/ or (orthopedic or orthopedics or orthopaedic or orthopaedics or acetabuloplasty or acetabuloplasties or amputation or amputations or amputate or amputates or amputated or amputating or hemipelvectomy or hemipelvectomies or arthrodesis or arthrodeses or arthroplasties or hemiarthroplasty or hemiarthroplasties or bone grafting or arthroscopy or arthroscopies or arthroscopic or joint capsule release or bone lengthening or Ilizarov Technique or Ilizarov Method or distraction osteogenesis or bone transplantation or bone transplant or bone transplants).ti,ab. | 399477  |
| #5                            | (fracture or fractures or meniscectomy or meniscectomies or osteotomy or osteotomies or tenodesis or tenodeses or tenotomy or tenotomies or tendon release).ti,ab.                                                                                                                                                                                                                                                                                                                                                                                                                                                                                                                                                                                                                                                                                                                                                                                                                                                                                                                                                                                                                                                                                                                                                                                                                                                  | 274897  |
| #6                            | (fixation or fixations or reduction or reductions).ti,ab.                                                                                                                                                                                                                                                                                                                                                                                                                                                                                                                                                                                                                                                                                                                                                                                                                                                                                                                                                                                                                                                                                                                                                                                                                                                                                                                                                           | 1216917 |
| #7                            | 5 and 6                                                                                                                                                                                                                                                                                                                                                                                                                                                                                                                                                                                                                                                                                                                                                                                                                                                                                                                                                                                                                                                                                                                                                                                                                                                                                                                                                                                                             | 59496   |
| #8                            | (cranial or cranium or jaw or mandible or maxillofacial or maxilla-mandibular or orthognathic or vertebrae or vertebral or lumbar or thoracic or cervical or ilium or ilial or iliac wing or ischial or ischium or sacral or sacrum or pelvic or pelvis or pubis or symphysis or acetabulum or acetabular or ankle or ankles or calcaneus or foot or feet or midfoot or forefoot or femur or femurs or femoral or tibia or tibias or fibula or fibulas or tibial or knee or knees or patella or patellar or hip or hips or intervertebral or atlanto-axial or glenohumeral or glenohumeral or shoulder or shoulders or humerus or humeral or ulnar or ulna or radius or radial or forearm or forearms or scapula or scapulas or scapular or costal or intracostal or intercostal or clavicle or clavicles or clavicular or sternum or sternums or sternal or                                                                                                                                                                                                                                                                                                                                                                                                                                                                                                                                                        | 3339552 |

|     |                                                                                                                                                                                                                                                                                                                                                                                                                                                                                                                                                                                                                                                                                                                                                                                                                                                                                                                                                                                                                                                                                                                                                                                                                                                                                                                                                                                                                                                                                                                                                                                                                                                                                                                                                                                                                                                                                      |         |
|-----|--------------------------------------------------------------------------------------------------------------------------------------------------------------------------------------------------------------------------------------------------------------------------------------------------------------------------------------------------------------------------------------------------------------------------------------------------------------------------------------------------------------------------------------------------------------------------------------------------------------------------------------------------------------------------------------------------------------------------------------------------------------------------------------------------------------------------------------------------------------------------------------------------------------------------------------------------------------------------------------------------------------------------------------------------------------------------------------------------------------------------------------------------------------------------------------------------------------------------------------------------------------------------------------------------------------------------------------------------------------------------------------------------------------------------------------------------------------------------------------------------------------------------------------------------------------------------------------------------------------------------------------------------------------------------------------------------------------------------------------------------------------------------------------------------------------------------------------------------------------------------------------|---------|
|     | elbow or elbows or wrist or wrists or hand or hands or interphalangeal or inter-phalangeal or tarsal or tarsals or metatarsal or metatarsals or carpal or phalanges or bone or bones or skeletal or skeleton or skeletons or fracture or fractures or intramedullary or joint or joints or limb or limbs or costochondral or cartilage or rib or ribs or talus or talar or metacarpal or carpal or tendon or tendons or ligament or ligaments or muscle or muscles or ACL or meniscus or meniscal or intraarticular or intra-articular or synovial or synovium).ti,ab.                                                                                                                                                                                                                                                                                                                                                                                                                                                                                                                                                                                                                                                                                                                                                                                                                                                                                                                                                                                                                                                                                                                                                                                                                                                                                                               |         |
| #9  | (electrosurgery or electrosurgeries or electrosurgical or radiosurgery or radiosurgeries or radiosurgical or surgery or surgeries or surgical or operative or operation or operations or dissect or dissected or dissection or dissections or dissecting or microdissect or microdissected or microdissection or microdissections or microdissecting or cauter or cauterization or cauterizations or cauterize or cauterizes or cauterized or transplant or transplants or transplanting or transplanted or transplantation or implant or implants or implanted or implanting or implantation or implantations or graft or grafted or grafts or grafting or homograft or homografted or homografts or homografting or allograft or allografts or allografting or allografted or xenograft or xenografts or xenografted or xenografting or autograft or autografts or autografted or autografting or prostheses or prosthesis or prosthetic or bypass or rod or rods or intramedullary nail or intramedullary nails or IM nail or IM nails or cephalomedullary nail or cephalomedullary nails or screw or screws or pin or pins or cage or cages or diversion or drainage or drain or drained or draining or drains or debride or debrides or debridement or fuse or fused or fusing or fusion or fusions or traction or tractions or mobilization or mobilisation or manipulation or manipulations or revascularize or revascularized or revascularization or revascularizations or revascularizes or replacement or replacements or lengthen or lengthens or lengthening or distraction or fixation or fixations or fixate or fixated or fixating or nonunion or ORIF or reduction or reductions or salvage or salvages or salvaging or reconstruct or reconstructs or reconstruction or reconstructions or reconstructed or harvest or harvests or harvested or harvesting).ti,ab. | 5046397 |
| #10 | 8 and 9                                                                                                                                                                                                                                                                                                                                                                                                                                                                                                                                                                                                                                                                                                                                                                                                                                                                                                                                                                                                                                                                                                                                                                                                                                                                                                                                                                                                                                                                                                                                                                                                                                                                                                                                                                                                                                                                              | 1139431 |
| #11 | 4 or 7 or 10                                                                                                                                                                                                                                                                                                                                                                                                                                                                                                                                                                                                                                                                                                                                                                                                                                                                                                                                                                                                                                                                                                                                                                                                                                                                                                                                                                                                                                                                                                                                                                                                                                                                                                                                                                                                                                                                         | 1293273 |
| #12 | exp Pain/ or exp Pain management/ or (pain or pains or painful).ti,ab.                                                                                                                                                                                                                                                                                                                                                                                                                                                                                                                                                                                                                                                                                                                                                                                                                                                                                                                                                                                                                                                                                                                                                                                                                                                                                                                                                                                                                                                                                                                                                                                                                                                                                                                                                                                                               | 797000  |
| #13 | exp Musculoskeletal System/ or exp Extremities/ or exp Bones of Lower Extremity/ or exp Lower Extremity/ or exp Upper Extremity/ or exp Bones of Upper Extremity/ or (musculoskeletal or MSK or cartilage or cartilages or fibrocartilage or Fibrocartilages or fascia or fascial or ligament or ligaments or connective tissue or connective tissues or entheses or entheses or muscular or bone or bones or joint or joints or tendon or tendons or meniscus or meniscal or spine or spinal or low back or lower back or upper back or lumbar or vertebrae or vertebral or intervertebral or disc or discs or cervical or thoracic or pelvis or pelvic or neck or arm or arms or elbow or elbows or shoulder or shoulders or glenohumeral or glenohumerous or wrist or wrists hand or hands or carpal or metacarpal or palmar or interphalangeal or phalanges or finger or fingers or knuckle or knuckles or rotator or sacroiliac or rib or ribs or flank or flanks or diaphragm or clavicle or sternum or sternal or chest or hip or hips or                                                                                                                                                                                                                                                                                                                                                                                                                                                                                                                                                                                                                                                                                                                                                                                                                                     | 3950497 |

|                                      |                                                                                                                                                                                                                                                                                                                                                                                                                                                                                                                                                                                                                                                                                                                                                                                                                                                                                                                                                                                                                                                                                                                                                                                                                                                                                                                                                                                                                                                                                                                                                                                                                                                                                                                                                                                                                                                                                                                                                                                                                                                                                                                                                                                                                                                                                                                                                                                                                                                                                                                                                                                                                                                                                                                                                                                                                                                                                                                                                                                                                                                                                                                                                             |         |
|--------------------------------------|-------------------------------------------------------------------------------------------------------------------------------------------------------------------------------------------------------------------------------------------------------------------------------------------------------------------------------------------------------------------------------------------------------------------------------------------------------------------------------------------------------------------------------------------------------------------------------------------------------------------------------------------------------------------------------------------------------------------------------------------------------------------------------------------------------------------------------------------------------------------------------------------------------------------------------------------------------------------------------------------------------------------------------------------------------------------------------------------------------------------------------------------------------------------------------------------------------------------------------------------------------------------------------------------------------------------------------------------------------------------------------------------------------------------------------------------------------------------------------------------------------------------------------------------------------------------------------------------------------------------------------------------------------------------------------------------------------------------------------------------------------------------------------------------------------------------------------------------------------------------------------------------------------------------------------------------------------------------------------------------------------------------------------------------------------------------------------------------------------------------------------------------------------------------------------------------------------------------------------------------------------------------------------------------------------------------------------------------------------------------------------------------------------------------------------------------------------------------------------------------------------------------------------------------------------------------------------------------------------------------------------------------------------------------------------------------------------------------------------------------------------------------------------------------------------------------------------------------------------------------------------------------------------------------------------------------------------------------------------------------------------------------------------------------------------------------------------------------------------------------------------------------------------------|---------|
|                                      | leg or legs or knee or knees or ankle or ankles or foot or feet or tarsal or metatarsals or plantar or toe or toes or myofascial or tendon or tendons or jaw or jaws or mandible or mandibular or skull or skulls or cranium or cranial or extremity or extremities or limb or limbs).ti,ab.                                                                                                                                                                                                                                                                                                                                                                                                                                                                                                                                                                                                                                                                                                                                                                                                                                                                                                                                                                                                                                                                                                                                                                                                                                                                                                                                                                                                                                                                                                                                                                                                                                                                                                                                                                                                                                                                                                                                                                                                                                                                                                                                                                                                                                                                                                                                                                                                                                                                                                                                                                                                                                                                                                                                                                                                                                                                |         |
| #14<br><i>MSK pain</i>               | 12 and 13                                                                                                                                                                                                                                                                                                                                                                                                                                                                                                                                                                                                                                                                                                                                                                                                                                                                                                                                                                                                                                                                                                                                                                                                                                                                                                                                                                                                                                                                                                                                                                                                                                                                                                                                                                                                                                                                                                                                                                                                                                                                                                                                                                                                                                                                                                                                                                                                                                                                                                                                                                                                                                                                                                                                                                                                                                                                                                                                                                                                                                                                                                                                                   | 373524  |
| #15                                  | 11 or 14                                                                                                                                                                                                                                                                                                                                                                                                                                                                                                                                                                                                                                                                                                                                                                                                                                                                                                                                                                                                                                                                                                                                                                                                                                                                                                                                                                                                                                                                                                                                                                                                                                                                                                                                                                                                                                                                                                                                                                                                                                                                                                                                                                                                                                                                                                                                                                                                                                                                                                                                                                                                                                                                                                                                                                                                                                                                                                                                                                                                                                                                                                                                                    | 1527640 |
| #16<br><i>Trauma, ortho-specific</i> | "Wounds and Injuries"/ or exp Accidental Injuries/ or exp Amputation, Traumatic/ or exp Fractures, Bone/ or exp Ankle Fractures/ or exp Femoral Fractures/ or exp Fracture Dislocation/ or exp Fractures, Avulsion/ or exp Fractures, Closed/ or exp Fractures, Comminuted/ or exp Fractures, Compression/ or exp Fractures, Malunited/ or exp Fractures, Multiple/ or exp Fractures, Open/ or exp Fractures, Spontaneous/ or exp Fractures, Stress/ or exp Fractures, Ununited/ or exp Humeral Fractures/ or exp Intra-Articular Fractures/ or exp Osteoporotic Fractures/ or exp Periprosthetic Fractures/ or exp Radius Fractures/ or exp Rib Fractures/ or exp Shoulder Fractures/ or exp Skull Fractures/ or exp Spinal Fractures/ or exp Tibial Fractures/ or exp Ulna Fractures/ or exp Fractures, Cartilage/ or exp Arm Injuries/ or exp Forearm Injuries/ or exp Wrist Injuries/ or exp Athletic Injuries/ or exp Back Injuries/ or exp Spinal Injuries/ or exp Barotrauma/ or exp Blast Injuries/ or exp Crush Injuries/ or exp Hand Injuries/ or exp Finger Injuries/ or exp Hip Injuries/ or exp Hip Dislocation/ or exp Joint Dislocations/ or exp Diastasis, Bone/ or exp Diastasis, Muscle/ or exp Patellar dislocation/ or exp Shoulder dislocation/ or exp Leg Injuries/ or exp Ankle Injuries/ or exp Foot injuries/ or exp Knee Injuries/ or exp Medial Tibial Stress Syndrome/ or exp Tibial Meniscus Injuries/ or exp Neck Injuries/ or exp Whiplash injuries/ or exp Shoulder Injuries/ or exp Rotator Cuff Injuries/ or exp Shoulder impingement syndrome/ or exp Microtrauma, Physical/ or exp Multiple Trauma/ or exp Trauma Centers/ or Wounds, Nonpenetrating/ or exp Wounds, Penetrating/ or exp "Sprains and Strains"/ or exp Cumulative Trauma Disorders/ or exp Tendon Injuries/ or exp Wounds, Gunshot/ or exp Wounds, Stab/ or exp Accidental Falls/ or exp Accidents, Traffic/ or (trauma or traumas or traumatic or polytrauma or barotrauma or injury or injuries or injured or injure or injuring or wound or wounds or wounded or dislocation or dislocations or dislocate or dislocates or dislocated or diastasis or rupture or ruptures or ruptured or impingement or impingements or disarticulation or disarticulations or disarticulated or disarticulate or disarticulates or disarticulating or sprain or sprains or sprained or tear or tears or torn or whiplash or blunt or crush or crushed or penetrate or penetrates or penetrating or penetrated or penetration or nonpenetrating or non penetrating or fracture or fractures or fractured or nonunion or malunited or lacerate or lacerates or lacerated or laceration or lacerations or perforation or perforations or perforate or perforates or perforated or falls or falling or motor vehicle collision or motor vehicle collisions or motor vehicle accident or motor vehicle accidents or motor vehicle crash or car accident or car accidents or car crash or vehicular accident or vehicular accidents or vehicular collision or vehicular collisions or vehicular crash or traffic accident or traffic accidents or MVC or traffic crash or | 1859193 |

|     |                                                                                                                                                                   |      |
|-----|-------------------------------------------------------------------------------------------------------------------------------------------------------------------|------|
|     | automobile crash or automobile collision or automobile collisions or automobile accident or gunshot or gun shot or firearm or firearms or stab or stabbed).ti,ab. |      |
| #17 | 3 and 15 and 16                                                                                                                                                   | 8566 |
| #18 | 17 and English language                                                                                                                                           | 7753 |
| #19 | 18 not (exp animals/ not exp humans/)                                                                                                                             | 6350 |
| #20 | 19 not (case reports.pt OR editorial.pt OR letter.pt OR comment.pt)                                                                                               | 5356 |

**Search update: Ovid MEDLINE(R) ALL 1946 to February 24, 2021**

Search date: 2/25/2021

| Search Set          | Search Strategy                                                                                                                                                                                                                                                                                                                                                                                                                                                                                                                                                                                                                                                                                                                                                                                                                                                                                                                                                                                                                                                                                                                                                                                                                                                                                                                                                                                                                                                                                                                                                                                                                                                                                                                                                                                                                                                                                                                                                                                                                                                                                                                                                                                                                              | Results |
|---------------------|----------------------------------------------------------------------------------------------------------------------------------------------------------------------------------------------------------------------------------------------------------------------------------------------------------------------------------------------------------------------------------------------------------------------------------------------------------------------------------------------------------------------------------------------------------------------------------------------------------------------------------------------------------------------------------------------------------------------------------------------------------------------------------------------------------------------------------------------------------------------------------------------------------------------------------------------------------------------------------------------------------------------------------------------------------------------------------------------------------------------------------------------------------------------------------------------------------------------------------------------------------------------------------------------------------------------------------------------------------------------------------------------------------------------------------------------------------------------------------------------------------------------------------------------------------------------------------------------------------------------------------------------------------------------------------------------------------------------------------------------------------------------------------------------------------------------------------------------------------------------------------------------------------------------------------------------------------------------------------------------------------------------------------------------------------------------------------------------------------------------------------------------------------------------------------------------------------------------------------------------|---------|
| #1<br><i>NSAIDs</i> | exp Anti-Inflammatory Agents, Non-Steroidal/ or exp Diclofenac/ or exp Apazone/ or exp Aspirin/ or exp Celecoxib/ or exp Ibuprofen/ or exp Diclofenac/ or exp Diflunisal/ or exp Etodolac/ or exp Fenoprofen/ or exp Flufenamic Acid/ or exp Indomethacin/ or exp Ketoprofen/ or exp Ketorolac/ or exp Meclofenamic Acid/ or exp Mefenamic Acid/ or exp Meloxicam/ or exp Nabumetone/ or exp Naproxen/ or exp Nefopam/ or exp Oxaprozin/ or exp Piroxicam/ or exp Phenylbutazone/ or exp Sulindac/ or exp Tolmetin/ or ("nonsteroid antiinflammatory agents" or "nonsteroid antiinflammatory agent" or "nonsteroid anti-inflammatory agents" or "nonsteroid anti-inflammatory agent" or "non-steroid antiinflammatory agents" or "non-steroid antiinflammatory agent" or "non-steroid anti-inflammatory agents" or "non-steroid anti-inflammatory agent" or "nonsteroidal antiinflammatory agents" or "nonsteroidal antiinflammatory agent" or "nonsteroidal anti-inflammatory agents" or "nonsteroidal anti-inflammatory agent" or "non-steroidal antiinflammatory agents" or "non-steroidal antiinflammatory agent" or "non-steroidal anti-inflammatory agents" or "non-steroidal anti-inflammatory agent" or "non-steroidal antiinflammatory agents" or "non-steroidal antiinflammatory agent" or "non-steroidal anti-inflammatory agents" or "non-steroidal anti-inflammatory agent" or "non-steroidal antiinflammatory agents" or "non-steroidal antiinflammatory agent" or "non-steroidal anti-inflammatory agents" or "non-steroidal anti-inflammatory agent" or NSAID or NSAIDs or apazone or aspirin or "acetylsalicylic acid" or "salicylic acid" or salsalate or bromfenac or celecoxib or Celebrex or dexibuprofen or dexketoprofen or diclofenac or voltaren or aceclofenac or diflunisal or droxicam or etodolac or etoricoxib or fenoprofen or "flufenamic acid" or flurbiprofen or ibuprofen or ibuproxam or advil or motrin or indomethacin or indomethacin or Indocin or ketoprofen or ketorolac or toradol or loxoprofen or "Meclofenamate sodium" or "mefenamic acid" or "meclofenamic acid" or meloxicam or nabumetone or naproxen or aleve or anaprox or naprelan or naprosyn or nefopam or nimesulide or oxaprozin or | 274252  |



|                      |                                                                                                                                                                                                                                                                                                                                                                                                                                                                                                                                                                                                                                                                                                                                                                                                                                                                                                                                                                                                                                                                                                                                                                                                                                                                                                                                                                                                                                                                                                                                                                                                                                                                                                                                                                                                                                                                                                                                                                                                                                                                                                                                                                                                                                                                                                                                                                                                                                                                                                                                                                                                                                                                                                                                                                                                                                                                                                                                                                                                                                                                                                                                                                                                                                                                                                                                     |        |
|----------------------|-------------------------------------------------------------------------------------------------------------------------------------------------------------------------------------------------------------------------------------------------------------------------------------------------------------------------------------------------------------------------------------------------------------------------------------------------------------------------------------------------------------------------------------------------------------------------------------------------------------------------------------------------------------------------------------------------------------------------------------------------------------------------------------------------------------------------------------------------------------------------------------------------------------------------------------------------------------------------------------------------------------------------------------------------------------------------------------------------------------------------------------------------------------------------------------------------------------------------------------------------------------------------------------------------------------------------------------------------------------------------------------------------------------------------------------------------------------------------------------------------------------------------------------------------------------------------------------------------------------------------------------------------------------------------------------------------------------------------------------------------------------------------------------------------------------------------------------------------------------------------------------------------------------------------------------------------------------------------------------------------------------------------------------------------------------------------------------------------------------------------------------------------------------------------------------------------------------------------------------------------------------------------------------------------------------------------------------------------------------------------------------------------------------------------------------------------------------------------------------------------------------------------------------------------------------------------------------------------------------------------------------------------------------------------------------------------------------------------------------------------------------------------------------------------------------------------------------------------------------------------------------------------------------------------------------------------------------------------------------------------------------------------------------------------------------------------------------------------------------------------------------------------------------------------------------------------------------------------------------------------------------------------------------------------------------------------------------|--------|
|                      | parecoxib or piroxicam or phenylbutazone or salsalate or sulindac or tenoxicam or "tiaprofenic acid" or "tolfenamic acid" or tolmetin).ti,ab.                                                                                                                                                                                                                                                                                                                                                                                                                                                                                                                                                                                                                                                                                                                                                                                                                                                                                                                                                                                                                                                                                                                                                                                                                                                                                                                                                                                                                                                                                                                                                                                                                                                                                                                                                                                                                                                                                                                                                                                                                                                                                                                                                                                                                                                                                                                                                                                                                                                                                                                                                                                                                                                                                                                                                                                                                                                                                                                                                                                                                                                                                                                                                                                       |        |
| #2<br><i>Opioids</i> | exp Analgesics, Opioid/ or exp Alfentanil/ or exp Alphaprodine/ or exp Butorphanol/ or exp Buprenorphine, Naloxone Drug Combination/ or exp Codeine/ or exp Dextromoramide/ or exp Dextropropoxyphene/ or exp Dihydromorphine/ or exp Diphenoxylate/ or exp Ethylketocyclazocine/ or exp Ethylmorphine/ or exp Fentanyl/ or exp Heroin/ or exp Hydrocodone/ or exp Levorphanol/ or exp Meperidine/ or exp Meptazinol/ or exp Methadone/ or exp Methadyl Acetate/ or exp Morphine/ or exp Nalbuphine/ or exp Opiate Alkaloids/ or exp Opium/ or exp Oxycodone/ or exp Oxymorphone/ or exp Pentazocine/ or exp Phenazocine/ or exp Phenoperidine/ or exp Pirinitramide/ or exp Promedol/ or exp Remifentanil/ or exp Sufentanil/ or exp Tapentadol/ or exp Tilidine/ or exp Tramadol/ or (Opioid or Opioids or Opiate or Opiates or Narcotic or Narcotics or Dihydroetorphine or Vicodin or acrylfentanyl or alfentanil or alphaprodine or "beta-casomorphin" or "beta-casomorphins" or Butorphanol or Beforal or Moradol or Stadol or Torbugesic or Dolorex or "Buprenorphine Naloxone" or Suboxone or carfentanil or Codeine or Ardinex or Isocodeine or crotonylfentanyl or cyclopropylfentanyl or deltorphin or dermorphin or desomorphine or krokodil or Dextromoramide or Pyrrolamidol or "D-Moramide" or Palfium or Dextropropoxyphene or Propoxyphene or Darvon or dezocine or dihydrocodeine or paramol or Rikodeine or Tiamon or Tosidrin or Contugesic or Dicodin or Paracodin or Paracodina or Dihydromorphine or Paramorfan or Paramorphan or Diphenoxylate or dynorphin or dynorphins or dinorphin or dinorphins or endomorphin or Enkephalin or eseroline or Ethylketocyclazocine or Ethylmorphine or Trachyl or Dionine or Etorphine or Ethorphine or Fentanyl or Phentanyl or Fentanest or Sublimaze or Duragesic or Durogesic or Fentora or Heroin or Diacetylmorphine or Diamorphine or Diagesil or Diamorf or Hydrocodone or Hydrocodon or Dihydrocodeinone or Dicodid or Robidone or Hydrocon or Codinovo or Hycodan or Hycon or Hydromorphone or Dihydromorphinone or Hydromorphon or Palladone or Laudacon or Dilaudid or ketobemidone or cetobemidon or Levorphanol or levodroman or levorphan or levorphanol or lofentanil or lofentanyl or Meperidine or Pethidine or Isonipeccain or Dolsin or Dolosal or Dolin or Operidine or Dolantin or Dolargan or Lidol or Lydol or Demerol or Dolcontral or Meptazinol or Metid or Methadone or Biodone or Dolophine or Metadol or Metasedin or Symoron or Methadose or Methex or Phenadone or Physeptone or Phymet or Pinadone or Amidone or Acetylmethadol or Alphacetylmethadol or Amidolacetate or Dimepseptanol or Levoacetylmethadol or Methadol or Acemethadone or Levomethadyl or Morphine or Morphia or "MS Contin" or Oramorph or Duramorph or Nalbuphine or Nubain or nocistatin or normethadone or Opium or Papaveretum or Omnopon or Pantopon or Oxycodone or Dihydrone or Oxycone or Dihydrohydroxycodone or Oxycodone or Eucodal or Theocodin or Oxycontin or Pancodine or Dinarkon or Oxiconum or Oxymorphone or Numorphan or Opana or paracymethadol or noracetylmethadol or Pentazocine or Lexir or Talwin or Fortral or Phenazocine or Phenethylazocine or Phenbenzorphin or Narphen or Phenoperidine or Fenoperidine or Lealgin or Operidine or | 242279 |

|                               |                                                                                                                                                                                                                                                                                                                                                                                                                                                                                                                                                                                                                                                                                                                                                                                                                                                                                                                                                                                                                                                                                                                                                                                                                                                                                                                                                                                                                   |         |
|-------------------------------|-------------------------------------------------------------------------------------------------------------------------------------------------------------------------------------------------------------------------------------------------------------------------------------------------------------------------------------------------------------------------------------------------------------------------------------------------------------------------------------------------------------------------------------------------------------------------------------------------------------------------------------------------------------------------------------------------------------------------------------------------------------------------------------------------------------------------------------------------------------------------------------------------------------------------------------------------------------------------------------------------------------------------------------------------------------------------------------------------------------------------------------------------------------------------------------------------------------------------------------------------------------------------------------------------------------------------------------------------------------------------------------------------------------------|---------|
|                               | Pirintramide or Pirintramid or Dipidolor or Dipydolor or Promedol or Dimethylmeperidine or Trimeperidine or Isopromedol or protopine or fumarine or Remifentanil or Ultiva or Sufentanil or Sulfentanyl or Sulfentanil or Sufenta or Tapentadol or Nucynta or Tilidine or Tilidate or Tilidin or Valoron or Valerone or Tramadol or Tramundin or biodalgic or Jutadol or Nobligan or Prontofort or Zytram or Takadol or Theradol or Tiral or Topalgic or Tradol or Tradolpuren or Tradonal or Tralgiol or Trama or TramaDorsch or Biokanol or Tramabeta or Tramadin or Tramadoc or Ranitidin or Trasedal or Ultram or Xymel or Zamudol or Zumalgic or Zydol or Tramadura or Tramagetic or Tramagit or Tramaake or Tramal or Tramex or Adolonta or Contramal or Amadol or Skudexa Abstral or Actiq or Anexsia or Avinza or Butrans or co-gesic or Demerol or Dolophine or embeda or Exalgo or Fentora or hycet or hydromet or Hysingla or Kadian or liquicet or Lorcet or Lortab or Norco or Nucynta or Onsolis or Oramorph or oxycet or Oxaydo or Oxycontin or Percocet or Percodan or rezira or Roxanol or Roxicet or sublimaze or targiniq or tussionex or tuzistra or xtampza or Vicodin or vicoprofen or vituz or xartemis or xodol or Zohydro or zolvit or zutripro or zydone).ti,ab.                                                                                                                        |         |
| #3                            | 1 or 2                                                                                                                                                                                                                                                                                                                                                                                                                                                                                                                                                                                                                                                                                                                                                                                                                                                                                                                                                                                                                                                                                                                                                                                                                                                                                                                                                                                                            | 504015  |
| #4<br><i>Ortho procedures</i> | exp Orthopedic Procedures/ or exp Ulnar Collateral Ligament Reconstruction/ or exp Acetabuloplasty/ or exp Amputation/ or exp Disarticulation/ or exp Hemipelvectomy/ or exp Arthrodesis/ or exp Arthroplasty/ or exp Anterior Cruciate Ligament Reconstruction/ or exp Bone-Patellar Tendon-Bone Grafting/ or exp Arthroplasty, Subchondral/ or exp Posterior Cruciate Ligament Reconstruction/ or exp Arthroscopy/ or exp Joint Capsule Release/ or exp Bone lengthening/ or exp Ilizarov Technique/ or exp Osteogenesis, Distraction/ or exp Bone Transplantation/ or exp Fracture Fixation/ or exp Closed fracture reduction/ or exp Fracture Fixation, Internal/ or exp Open fracture reduction/ or exp Limb salvage/ or exp Meniscectomy/ or exp Osteotomy/ or exp Alveolar Bone Grafting/ or exp Tenodesis/ or exp Tenotomy/ or (orthopedic or orthopedics or orthopaedic or orthopaedics or acetabuloplasty or acetabuloplasties or amputation or amputations or amputate or amputates or amputated or amputating or hemipelvectomy or hemipelvectomy or arthrodesis or arthrodeses or arthroplasties or hemiarthroplasty or hemiarthroplasties or bone grafting or arthroscopy or arthroscopies or arthroscopic or joint capsule release or bone lengthening or Ilizarov Technique or Ilizarov Method or distraction osteogenesis or bone transplantation or bone transplant or bone transplants).ti,ab. | 421405  |
| #5                            | (fracture or fractures or meniscectomy or meniscectomies or osteotomy or osteotomies or tenodesis or tenodeses or tenotomy or tenotomies or tendon release).ti,ab.                                                                                                                                                                                                                                                                                                                                                                                                                                                                                                                                                                                                                                                                                                                                                                                                                                                                                                                                                                                                                                                                                                                                                                                                                                                | 291657  |
| #6                            | (fixation or fixations or reduction or reductions).ti,ab.                                                                                                                                                                                                                                                                                                                                                                                                                                                                                                                                                                                                                                                                                                                                                                                                                                                                                                                                                                                                                                                                                                                                                                                                                                                                                                                                                         | 1289306 |
| #7                            | 5 and 6                                                                                                                                                                                                                                                                                                                                                                                                                                                                                                                                                                                                                                                                                                                                                                                                                                                                                                                                                                                                                                                                                                                                                                                                                                                                                                                                                                                                           | 63592   |
| #8                            | (cranial or cranium or jaw or mandible or maxillofacial or maxilla-mandibular or orthognathic or vertebrae or vertebral or lumbar or thoracic or cervical or ilium or ilial or iliac wing or ischial or ischium or sacral or sacrum or pelvic or pelvis or pubis or symphysis or acetabulum or acetabular or ankle or ankles or calcaneus or foot or feet or midfoot or forefoot or femur or femurs or femoral or tibia or tibias or fibula or fibulas or tibial or knee or knees or patella or                                                                                                                                                                                                                                                                                                                                                                                                                                                                                                                                                                                                                                                                                                                                                                                                                                                                                                                   | 3509769 |



|     |                                                                                                                                                                                                                                                                                                                                                                                                                                                                                                                                                                                                                                                                                                                                                                                                                                                                                                                                                                                                                                                                                                                                                                                                                                                                                                                                                                                                                                                                                                                                                                                                                                                                                                                                                                                                                                                                                      |         |
|-----|--------------------------------------------------------------------------------------------------------------------------------------------------------------------------------------------------------------------------------------------------------------------------------------------------------------------------------------------------------------------------------------------------------------------------------------------------------------------------------------------------------------------------------------------------------------------------------------------------------------------------------------------------------------------------------------------------------------------------------------------------------------------------------------------------------------------------------------------------------------------------------------------------------------------------------------------------------------------------------------------------------------------------------------------------------------------------------------------------------------------------------------------------------------------------------------------------------------------------------------------------------------------------------------------------------------------------------------------------------------------------------------------------------------------------------------------------------------------------------------------------------------------------------------------------------------------------------------------------------------------------------------------------------------------------------------------------------------------------------------------------------------------------------------------------------------------------------------------------------------------------------------|---------|
|     | patellar or hip or hips or intervertebral or atlanto-axial or gleno-humeral or glenohumeral or shoulder or shoulders or humerus or humeral or ulnar or ulna or radius or radial or forearm or forearms or scapula or scapulas or scapular or costal or intracostal or intercostal or clavicle or clavicles or clavicular or sternum or sternums or sternal or elbow or elbows or wrist or wrists or hand or hands or interphalangeal or inter-phalangeal or tarsal or tarsals or metatarsal or metatarsals or carpal or phalanges or bone or bones or skeletal or skeleton or skeletons or fracture or fractures or intramedullary or joint or joints or limb or limbs or costochondral or cartilage or rib or ribs or talus or talar or metacarpal or carpal or tendon or tendons or ligament or ligaments or muscle or muscles or ACL or meniscus or meniscal or intraarticular or intra-articular or synovial or synovium).ti,ab.                                                                                                                                                                                                                                                                                                                                                                                                                                                                                                                                                                                                                                                                                                                                                                                                                                                                                                                                                 |         |
| #9  | (electrosurgery or electrosurgeries or electrosurgical or radiosurgery or radiosurgeries or radiosurgical or surgery or surgeries or surgical or operative or operation or operations or dissect or dissected or dissection or dissections or dissecting or microdissect or microdissected or microdissection or microdissections or microdissecting or cauter or cauterization or cauterizations or cauterize or cauterizes or cauterized or transplant or transplants or transplanting or transplanted or transplantation or implant or implants or implanted or implanting or implantation or implantations or graft or grafted or grafts or grafting or homograft or homografted or homografts or homografting or allograft or allografts or allografting or allografted or xenograft or xenografts or xenografted or xenografting or autograft or autografts or autografted or autografting or prostheses or prosthesis or prosthetic or bypass or rod or rods or intramedullary nail or intramedullary nails or IM nail or IM nails or cephalomedullary nail or cephalomedullary nails or screw or screws or pin or pins or cage or cages or diversion or drainage or drain or drained or draining or drains or debride or debrides or debridement or fuse or fused or fusing or fusion or fusions or traction or tractions or mobilization or mobilisation or manipulation or manipulations or revascularize or revascularized or revascularization or revascularizations or revascularizes or replacement or replacements or lengthen or lengthens or lengthening or distraction or fixation or fixations or fixate or fixated or fixating or nonunion or ORIF or reduction or reductions or salvage or salvages or salvaging or reconstruct or reconstructs or reconstruction or reconstructions or reconstructed or harvest or harvests or harvested or harvesting).ti,ab. | 5332950 |
| #10 | 8 and 9                                                                                                                                                                                                                                                                                                                                                                                                                                                                                                                                                                                                                                                                                                                                                                                                                                                                                                                                                                                                                                                                                                                                                                                                                                                                                                                                                                                                                                                                                                                                                                                                                                                                                                                                                                                                                                                                              | 1205736 |
| #11 | 4 or 7 or 10                                                                                                                                                                                                                                                                                                                                                                                                                                                                                                                                                                                                                                                                                                                                                                                                                                                                                                                                                                                                                                                                                                                                                                                                                                                                                                                                                                                                                                                                                                                                                                                                                                                                                                                                                                                                                                                                         | 1366001 |
| #12 | exp Pain/ or exp Pain management/ or (pain or pains or painful).ti,ab.                                                                                                                                                                                                                                                                                                                                                                                                                                                                                                                                                                                                                                                                                                                                                                                                                                                                                                                                                                                                                                                                                                                                                                                                                                                                                                                                                                                                                                                                                                                                                                                                                                                                                                                                                                                                               | 843853  |
| #13 | exp Musculoskeletal System/ or exp Extremities/ or exp Bones of Lower Extremity/ or exp Lower Extremity/ or exp Upper Extremity/ or exp Bones of Upper Extremity/ or (musculoskeletal or MSK or cartilage or cartilages or fibrocartilage or Fibrocartilages or fascia or fascial or ligament or ligaments or connective tissue or connective tissues or entheses or entheses or muscular or bone or bones or joint or joints or tendon or tendons or meniscus or meniscal or spine or spinal or low back or lower back or upper back or lumbar or vertebrae or vertebral or intervertebral or disc or discs or cervical or thoracic or pelvis or pelvic or neck or arm or arms or elbow or elbows or                                                                                                                                                                                                                                                                                                                                                                                                                                                                                                                                                                                                                                                                                                                                                                                                                                                                                                                                                                                                                                                                                                                                                                                | 4135062 |

|                                      |                                                                                                                                                                                                                                                                                                                                                                                                                                                                                                                                                                                                                                                                                                                                                                                                                                                                                                                                                                                                                                                                                                                                                                                                                                                                                                                                                                                                                                                                                                                                                                                                                                                                                                                                                                                                                                                                                                                                                                                                                                                                                                                                                                                                                                                                                                                                                                                                                                                                                                                                                                                                                                                                                                                                                                                                  |         |
|--------------------------------------|--------------------------------------------------------------------------------------------------------------------------------------------------------------------------------------------------------------------------------------------------------------------------------------------------------------------------------------------------------------------------------------------------------------------------------------------------------------------------------------------------------------------------------------------------------------------------------------------------------------------------------------------------------------------------------------------------------------------------------------------------------------------------------------------------------------------------------------------------------------------------------------------------------------------------------------------------------------------------------------------------------------------------------------------------------------------------------------------------------------------------------------------------------------------------------------------------------------------------------------------------------------------------------------------------------------------------------------------------------------------------------------------------------------------------------------------------------------------------------------------------------------------------------------------------------------------------------------------------------------------------------------------------------------------------------------------------------------------------------------------------------------------------------------------------------------------------------------------------------------------------------------------------------------------------------------------------------------------------------------------------------------------------------------------------------------------------------------------------------------------------------------------------------------------------------------------------------------------------------------------------------------------------------------------------------------------------------------------------------------------------------------------------------------------------------------------------------------------------------------------------------------------------------------------------------------------------------------------------------------------------------------------------------------------------------------------------------------------------------------------------------------------------------------------------|---------|
|                                      | shoulder or shoulders or glenohumeral or glenohumerous or wrist or wrists hand or hands or carpal or metacarpal or palmar or interphalangeal or phalanges or finger or fingers or knuckle or knuckles or rotator or sacroiliac or rib or ribs or flank or flanks or diaphragm or clavicle or sternum or sternal or chest or hip or hips or leg or legs or knee or knees or ankle or ankles or foot or feet or tarsal or metatarsals or plantar or toe or toes or myofascial or tendon or tendons or jaw or jaws or mandible or mandibular or skull or skulls or cranium or cranial or extremity or extremities or limb or limbs).ti,ab.                                                                                                                                                                                                                                                                                                                                                                                                                                                                                                                                                                                                                                                                                                                                                                                                                                                                                                                                                                                                                                                                                                                                                                                                                                                                                                                                                                                                                                                                                                                                                                                                                                                                                                                                                                                                                                                                                                                                                                                                                                                                                                                                                          |         |
| #14<br><i>MSK pain</i>               | 12 and 13                                                                                                                                                                                                                                                                                                                                                                                                                                                                                                                                                                                                                                                                                                                                                                                                                                                                                                                                                                                                                                                                                                                                                                                                                                                                                                                                                                                                                                                                                                                                                                                                                                                                                                                                                                                                                                                                                                                                                                                                                                                                                                                                                                                                                                                                                                                                                                                                                                                                                                                                                                                                                                                                                                                                                                                        | 398232  |
| #15                                  | 11 or 14                                                                                                                                                                                                                                                                                                                                                                                                                                                                                                                                                                                                                                                                                                                                                                                                                                                                                                                                                                                                                                                                                                                                                                                                                                                                                                                                                                                                                                                                                                                                                                                                                                                                                                                                                                                                                                                                                                                                                                                                                                                                                                                                                                                                                                                                                                                                                                                                                                                                                                                                                                                                                                                                                                                                                                                         | 1614719 |
| #16<br><i>Trauma, ortho-specific</i> | "Wounds and Injuries"/ or exp Accidental Injuries/ or exp Amputation, Traumatic/ or exp Fractures, Bone/ or exp Ankle Fractures/ or exp Femoral Fractures/ or exp Fracture Dislocation/ or exp Fractures, Avulsion/ or exp Fractures, Closed/ or exp Fractures, Comminuted/ or exp Fractures, Compression/ or exp Fractures, Malunited/ or exp Fractures, Multiple/ or exp Fractures, Open/ or exp Fractures, Spontaneous/ or exp Fractures, Stress/ or exp Fractures, Ununited/ or exp Humeral Fractures/ or exp Intra-Articular Fractures/ or exp Osteoporotic Fractures/ or exp Periprosthetic Fractures/ or exp Radius Fractures/ or exp Rib Fractures/ or exp Shoulder Fractures/ or exp Skull Fractures/ or exp Spinal Fractures/ or exp Tibial Fractures/ or exp Ulna Fractures/ or exp Fractures, Cartilage/ or exp Arm Injuries/ or exp Forearm Injuries/ or exp Wrist Injuries/ or exp Athletic Injuries/ or exp Back Injuries/ or exp Spinal Injuries/ or exp Barotrauma/ or exp Blast Injuries/ or exp Crush Injuries/ or exp Hand Injuries/ or exp Finger Injuries/ or exp Hip Injuries/ or exp Hip Dislocation/ or exp Joint Dislocations/ or exp Diastasis, Bone/ or exp Diastasis, Muscle/ or exp Patellar dislocation/ or exp Shoulder dislocation/ or exp Leg Injuries/ or exp Ankle Injuries/ or exp Foot injuries/ or exp Knee Injuries/ or exp Medial Tibial Stress Syndrome/ or exp Tibial Meniscus Injuries/ or exp Neck Injuries/ or exp Whiplash injuries/ or exp Shoulder Injuries/ or exp Rotator Cuff Injuries/ or exp Shoulder impingement syndrome/ or exp Microtrauma, Physical/ or exp Multiple Trauma/ or exp Trauma Centers/ or Wounds, Nonpenetrating/ or exp Wounds, Penetrating/ or exp "Sprains and Strains"/ or exp Cumulative Trauma Disorders/ or exp Tendon Injuries/ or exp Wounds, Gunshot/ or exp Wounds, Stab/ or exp Accidental Falls/ or exp Accidents, Traffic/ or (trauma or traumas or traumatic or polytrauma or barotrauma or injury or injuries or injured or injure or injuring or wound or wounds or wounded or dislocation or dislocations or dislocate or dislocates or dislocated or diastasis or rupture or ruptures or ruptured or impingement or impingements or disarticulation or disarticulations or disarticulated or disarticulate or disarticulates or disarticulating or sprain or sprains or sprained or tear or tears or torn or whiplash or blunt or crush or crushed or penetrate or penetrates or penetrating or penetrated or penetration or nonpenetrating or non penetrating or fracture or fractures or fractured or nonunion or malunited or lacerate or lacerates or lacerated or laceration or lacerations or perforation or perforations or perforate or perforates or perforated or falls or falling or motor | 1969179 |

|     |                                                                                                                                                                                                                                                                                                                                                                                                                                                                                                                              |      |
|-----|------------------------------------------------------------------------------------------------------------------------------------------------------------------------------------------------------------------------------------------------------------------------------------------------------------------------------------------------------------------------------------------------------------------------------------------------------------------------------------------------------------------------------|------|
|     | vehicle collision or motor vehicle collisions or motor vehicle accident or motor vehicle accidents or motor vehicle crash or car accident or car accidents or car crash or vehicular accident or vehicular accidents or vehicular collision or vehicular collisions or vehicular crash or traffic accident or traffic accidents or MVC or traffic crash or automobile crash or automobile collision or automobile collisions or automobile accident or gunshot or gun shot or firearm or firearms or stab or stabbed).ti,ab. |      |
| #17 | 3 and 15 and 16                                                                                                                                                                                                                                                                                                                                                                                                                                                                                                              | 9231 |
| #18 | 17 and English language                                                                                                                                                                                                                                                                                                                                                                                                                                                                                                      | 8403 |
| #19 | 18 not (exp animals/ not exp humans/)                                                                                                                                                                                                                                                                                                                                                                                                                                                                                        | 6946 |
| #20 | 19 not (case reports.pt OR editorial.pt OR letter.pt OR comment.pt)                                                                                                                                                                                                                                                                                                                                                                                                                                                          | 5865 |
| #21 | limit 20 to da=20200301-20210301                                                                                                                                                                                                                                                                                                                                                                                                                                                                                             | 781  |

**Database: EMBASE (via Ovid, 1947 to 2020 March 18)**

Search date: 3/19/2020

| Search Set | Search Strategy                                                                                                                                                                                                                                                                                                                                                                                                                                                                                                                                                                                                                                                                                                                                                                                                                                                                                                                                                                                                                                                                                                                                                                                                                                                                                                                                                                                                                                                                                                                                                                                                                                                                                                                                                                                                                                                                                                                                                                                                                                                                           | Results |
|------------|-------------------------------------------------------------------------------------------------------------------------------------------------------------------------------------------------------------------------------------------------------------------------------------------------------------------------------------------------------------------------------------------------------------------------------------------------------------------------------------------------------------------------------------------------------------------------------------------------------------------------------------------------------------------------------------------------------------------------------------------------------------------------------------------------------------------------------------------------------------------------------------------------------------------------------------------------------------------------------------------------------------------------------------------------------------------------------------------------------------------------------------------------------------------------------------------------------------------------------------------------------------------------------------------------------------------------------------------------------------------------------------------------------------------------------------------------------------------------------------------------------------------------------------------------------------------------------------------------------------------------------------------------------------------------------------------------------------------------------------------------------------------------------------------------------------------------------------------------------------------------------------------------------------------------------------------------------------------------------------------------------------------------------------------------------------------------------------------|---------|
| #1         | ("nonsteroid antiinflammatory agents" or "nonsteroid antiinflammatory agent" or "nonsteroid anti-inflammatory agents" or "nonsteroid anti-inflammatory agent" or "non-steroid antiinflammatory agents" or "non-steroid antiinflammatory agent" or "non-steroid anti-inflammatory agents" or "non-steroid anti-inflammatory agent" or "nonsteroidal antiinflammatory agents" or "nonsteroidal antiinflammatory agent" or "nonsteroidal anti-inflammatory agents" or "nonsteroidal anti-inflammatory agent" or "non-steroidal antiinflammatory agents" or "non-steroidal antiinflammatory agent" or "non-steroidal anti-inflammatory agents" or "non-steroidal anti-inflammatory agent" or "nonsteroid antiinflammatory drugs" or "nonsteroid antiinflammatory drug" or "nonsteroid anti-inflammatory drugs" or "nonsteroid anti-inflammatory drug" or non-steroid antiinflammatory drugs or "non-steroid antiinflammatory drug" or "non-steroid anti-inflammatory drugs" or "non-steroid anti-inflammatory drug" or "nonsteroidal antiinflammatory drugs" or "nonsteroidal antiinflammatory drug" or "nonsteroidal anti-inflammatory drugs" or "nonsteroidal anti-inflammatory drug" or "nonsteroidal antiinflammatory drugs" or "nonsteroidal antiinflammatory drug" or "non-steroidal anti-inflammatory drugs" or "non-steroidal antiinflammatory drug" or NSAID or NSAIDs or apazone or aspirin or "acetylsalicylic acid" or "salicylic acid" or salsalate or bromfenac or celecoxib or Celebrex or dexibuprofen or dexketoprofen or diclofenac or voltaren or aceclofenac or diflunisal or droxicam or etodolac or etoricoxib or fenoprofen or "flufenamic acid" or flurbiprofen or ibuprofen or ibuprofen or advil or motrin or indomethacin or indomethacin or Indocin or ketoprofen or ketorolac or toradol or loxoprofen or "Meclofenamate sodium" or "mefenamic acid" or "meclofenamic acid" or meloxicam or nabumetone or naproxen or aleve or anaprox or naprelan or naprosyn or nefopam or nimesulide or oxaprozin or parecoxib or piroxicam or phenylbutazone or salsalate or | 249167  |

|    |                                                                                                                                                                                                                                                                                                                                                                                                                                                                                                                                                                                                                                                                                                                                                                                                                                                                                                                                                                                                                                                                                                                                                                                                                                                                                                                                                                                                                                                                                                                                                                                                                                                                                                                                                                                                                                                                                                                                                                                                                                                                                                                                                                                                                                                                                                                                                                                                                                                                                                                                                                                                                                                                                                                                                                                                                                                                                                                                                                                                                                                                                                                                                                                                                                                                                                                              |        |
|----|------------------------------------------------------------------------------------------------------------------------------------------------------------------------------------------------------------------------------------------------------------------------------------------------------------------------------------------------------------------------------------------------------------------------------------------------------------------------------------------------------------------------------------------------------------------------------------------------------------------------------------------------------------------------------------------------------------------------------------------------------------------------------------------------------------------------------------------------------------------------------------------------------------------------------------------------------------------------------------------------------------------------------------------------------------------------------------------------------------------------------------------------------------------------------------------------------------------------------------------------------------------------------------------------------------------------------------------------------------------------------------------------------------------------------------------------------------------------------------------------------------------------------------------------------------------------------------------------------------------------------------------------------------------------------------------------------------------------------------------------------------------------------------------------------------------------------------------------------------------------------------------------------------------------------------------------------------------------------------------------------------------------------------------------------------------------------------------------------------------------------------------------------------------------------------------------------------------------------------------------------------------------------------------------------------------------------------------------------------------------------------------------------------------------------------------------------------------------------------------------------------------------------------------------------------------------------------------------------------------------------------------------------------------------------------------------------------------------------------------------------------------------------------------------------------------------------------------------------------------------------------------------------------------------------------------------------------------------------------------------------------------------------------------------------------------------------------------------------------------------------------------------------------------------------------------------------------------------------------------------------------------------------------------------------------------------------|--------|
|    | sulindac or tenoxicam or "tiaprofenic acid" or "tolfenamic acid" or tolmetin).ti,ab.                                                                                                                                                                                                                                                                                                                                                                                                                                                                                                                                                                                                                                                                                                                                                                                                                                                                                                                                                                                                                                                                                                                                                                                                                                                                                                                                                                                                                                                                                                                                                                                                                                                                                                                                                                                                                                                                                                                                                                                                                                                                                                                                                                                                                                                                                                                                                                                                                                                                                                                                                                                                                                                                                                                                                                                                                                                                                                                                                                                                                                                                                                                                                                                                                                         |        |
| #2 | (Opioid or Opioids or Opiate or Opiates or Narcotic or Narcotics or Dihydroetorphine or Vicodin or acrylfentanyl or alfentanil or alphaprodine or "beta-casomorphin" or "beta-casomorphins" or Butorphanol or Beforal or Moradol or Stadol or Torbugesic or Dolorex or "Buprenorphine Naloxone" or Suboxone or carfentanil or Codeine or Ardinex or Isocodeine or crotonylfentanyl or cyclopropylfentanyl or deltorphin or dermorphin or desomorphine or krokodil or Dextromoramide or Pyrrolamidol or "D-Moramide" or Palfium or Dextropropoxyphene or Propoxyphene or Darvon or dezocine or dihydrocodeine or paramol or Rikodeine or Tiamon or Tosidrin or Contugesic or Dicodin or Paracodin or Paracodina or Dihydromorphine or Paramorfan or Paramorphan or Diphenoxylate or dynorphin or dynorphins or dinorphan or dinorphins or endomorphin or Enkephalin or eseroline or Ethylketocyclazocine or Ethylketazocine or Ethylmorphine or Trachyl or Dionine or Etorphine or Etorphine or Fentanyl or Phentanyl or Fentanest or Sublimaze or Duragesic or Durogesic or Fentora or Heroin or Diacetylmorphine or Diamorphine or Diagesil or Diamorf or Hydrocodone or Hydrocodon or Dihydrocodeinone or Dicodid or Robidone or Hydrocon or Codinovo or Hycodan or Hycon or Hydromorphone or Dihydromorphinone or Hydromorphan or Palladone or Laudacon or Dilaudid or ketobemidone or cetobemidon or Levorphanol or levodroman or levorphan or levorphanol or lofentanil or lofentanyl or Meperidine or Pethidine or Isonipeccain or Dolsin or Dolosal or Dolin or Operidine or Dolantin or Dolargan or Lidol or Lydol or Demerol or Dolcontral or Meptazinol or Metid or Methadone or Biodone or Dolophine or Metadol or Metasedin or Symoron or Methadose or Methex or Phenadone or Physeptone or Phymet or Pinadone or Amidone or Acetylmethadol or Alphacetylmethadol or Amidolacetate or Dimepheptanol or Levoacetylmethadol or Methadol or Acemethadone or Levomethadyl or Morphine or Morphia or "MS Contin" or Oramorph or Duramorph or Nalbuphine or Nubain or nocistatin or normethadone or Opium or Papaveretum or Omnopon or Pantopon or Oxycodone or Dihydrone or Oxycone or Dihydrohydroxycodone or Oxycodone or Eucodal or Theocodin or Oxycontin or Pancodine or Dinarkon or Oxiconum or Oxymorphone or Numorphan or Opana or paracymethadol or noracetylmethadol or Pentazocine or Lexir or Talwin or Fortral or Phenazocine or Phenethylazocine or Phenbenzorphane or Narphen or Phenoperidine or Fenoperidine or Lealgin or Operidine or Pirinitramide or Piritramid or Piritramide or Dipidolor or Dipydolor or Promedol or Dimethylmeperidine or Trimeperidine or Isopromedol or protopine or fumarine or Remifentanyl or Ultiva or Sufentanil or Sulfentanyl or Sulfentanil or Sufenta or Tapentadol or Nucynta or Tilidine or Tilidate or Tilidin or Valoron or Valerone or Tramadol or Tramundin or biodalgic or Jutadol or Nobligan or Prontofort or Zytram or Takadol or Theradol or Tiral or Topalgic or Tradol or Tradolpuren or Tradonal or Tralgiol or Trama or TramaDorsch or Biokanol or Tramabeta or Tramadin or Tramadoc or Ranitidin or Trasedal or Ultram or Xymel or Zamudol or Zumalgic or Zydol or Tramadura or Tramagetic or Tramagit or Tramake or Tramal or Tramex or Adolonta | 278347 |

|    |                                                                                                                                                                                                                                                                                                                                                                                                                                                                                                                                                                                                                                                                                                                                                                                                                                                                                                                                                                                                                                                                                                                                                                                                                                                                                                                                                                                                                                     |         |
|----|-------------------------------------------------------------------------------------------------------------------------------------------------------------------------------------------------------------------------------------------------------------------------------------------------------------------------------------------------------------------------------------------------------------------------------------------------------------------------------------------------------------------------------------------------------------------------------------------------------------------------------------------------------------------------------------------------------------------------------------------------------------------------------------------------------------------------------------------------------------------------------------------------------------------------------------------------------------------------------------------------------------------------------------------------------------------------------------------------------------------------------------------------------------------------------------------------------------------------------------------------------------------------------------------------------------------------------------------------------------------------------------------------------------------------------------|---------|
|    | or Contramal or Amadol or Skudexa Abstral or Actiq or Anexsia or Avinza or Butrans or co-gesic or Demerol or Dolophine or embeda or Exalgo or Fentora or hycet or hydromet or Hysingla or Kadian or liquicet or Lorcet or Lortab or Norco or Nucynta or Onsolis or Oramorph or oxycet or Oxaydo or Oxycontin or Percocet or Percodan or rezira or Roxanol or Roxicet or sublimaze or targiniq or tussionex or tuzistra or xtampza or Vicodin or vicoprofen or vituz or xartemis or xodol or Zohydro or zolvit or zutripro or zydone).ti,ab.                                                                                                                                                                                                                                                                                                                                                                                                                                                                                                                                                                                                                                                                                                                                                                                                                                                                                         |         |
| #3 | 1 or 2                                                                                                                                                                                                                                                                                                                                                                                                                                                                                                                                                                                                                                                                                                                                                                                                                                                                                                                                                                                                                                                                                                                                                                                                                                                                                                                                                                                                                              | 512956  |
| #4 | exp orthopedic surgery/ or exp ulnar collateral ligament reconstruction/ or exp acetabuloplasty/ or exp amputation/ or exp disarticulation/ or exp hemipelvectomy/ or exp arthrodesis/ or exp arthroplasty/ or exp anterior cruciate ligament reconstruction/ or exp bone transplantation/ or exp posterior cruciate ligament reconstruction/ or exp arthroscopy/ or exp capsular release/ or exp Ilizarov technique/ or exp distraction osteogenesis/ or exp fracture fixation/ or exp closed fracture reduction/ or exp open fracture reduction/ or exp limb salvage/ or exp meniscectomy/ or exp osteotomy/ or exp alveolar bone grafting/ or exp tenodesis/ or exp tenotomy/ or (orthopedic or orthopedics or orthopaedic or orthopaedics or acetabuloplasty or acetabuloplasties or amputation or amputations or amputate or amputates or amputated or amputating or hemipelvectomy or hemipelvectomy or arthrodesis or arthrodeses or arthroplasties or hemiarthroplasty or hemiarthroplasties or bone grafting or arthroscopy or arthroscopies or arthroscopic or joint capsule release or bone lengthening or Ilizarov Technique or Ilizarov Method or distraction osteogenesis or bone transplantation or bone transplantations or bone transplant or bone transplants).ti,ab.                                                                                                                                             | 617626  |
| #5 | (fracture or fractures or meniscectomy or meniscectomies or osteotomy or osteotomies or tenodesis or tenodeses or tenotomy or tenotomies or tendon release).ti,ab.                                                                                                                                                                                                                                                                                                                                                                                                                                                                                                                                                                                                                                                                                                                                                                                                                                                                                                                                                                                                                                                                                                                                                                                                                                                                  | 358316  |
| #6 | (fixation or fixations or reduction or reductions).ti,ab.                                                                                                                                                                                                                                                                                                                                                                                                                                                                                                                                                                                                                                                                                                                                                                                                                                                                                                                                                                                                                                                                                                                                                                                                                                                                                                                                                                           | 1667247 |
| #7 | 5 and 6                                                                                                                                                                                                                                                                                                                                                                                                                                                                                                                                                                                                                                                                                                                                                                                                                                                                                                                                                                                                                                                                                                                                                                                                                                                                                                                                                                                                                             | 76795   |
| #8 | (cranial or cranium or jaw or mandible or maxillofacial or maxilla-mandibular or orthognathic or vertebrae or vertebral or lumbar or thoracic or cervical or ilium or ilial or iliac wing or ischial or ischium or sacral or sacrum or pelvic or pelvis or pubis or symphysis or acetabulum or acetabular or ankle or ankles or calcaneus or foot or feet or midfoot or forefoot or femur or femurs or femoral or tibia or tibias or fibula or fibulas or tibial or knee or knees or patella or patellar or hip or hips or intervertebral or atlanto-axial or gleno-humeral or glenohumeral or shoulder or shoulders or humerus or humeral or ulnar or ulna or radius or radial or forearm or forearms or scapula or scapulas or scapular or costal or intracostal or intercostal or clavicle or clavicles or clavicular or sternum or sternums or sternal or elbow or elbows or wrist or wrists or hand or hands or interphalangeal or interphalangeal or tarsal or tarsals or metatarsal or metatarsals or carpal or phalanges or bone or bones or skeletal or skeleton or skeletons or fracture or fractures or intramedullary or joint or joints or limb or limbs or costochondral or cartilage or rib or ribs or talus or talar or metacarpal or carpal or tendon or tendons or ligament or ligaments or muscle or muscles or ACL or meniscus or meniscal or intraarticular or intra-articular or synovial or synovium).ti,ab. | 4620230 |

|                 |                                                                                                                                                                                                                                                                                                                                                                                                                                                                                                                                                                                                                                                                                                                                                                                                                                                                                                                                                                                                                                                                                                                                                                                                                                                                                                                                                                                                                                                                                                                                                                                                                                                                                                                                                                                                                                                                                      |         |
|-----------------|--------------------------------------------------------------------------------------------------------------------------------------------------------------------------------------------------------------------------------------------------------------------------------------------------------------------------------------------------------------------------------------------------------------------------------------------------------------------------------------------------------------------------------------------------------------------------------------------------------------------------------------------------------------------------------------------------------------------------------------------------------------------------------------------------------------------------------------------------------------------------------------------------------------------------------------------------------------------------------------------------------------------------------------------------------------------------------------------------------------------------------------------------------------------------------------------------------------------------------------------------------------------------------------------------------------------------------------------------------------------------------------------------------------------------------------------------------------------------------------------------------------------------------------------------------------------------------------------------------------------------------------------------------------------------------------------------------------------------------------------------------------------------------------------------------------------------------------------------------------------------------------|---------|
| #9              | (electrosurgery or electrosurgeries or electrosurgical or radiosurgery or radiosurgeries or radiosurgical or surgery or surgeries or surgical or operative or operation or operations or dissect or dissected or dissection or dissections or dissecting or microdissect or microdissected or microdissection or microdissections or microdissecting or cauter or cauterization or cauterizations or cauterize or cauterizes or cauterized or transplant or transplants or transplanting or transplanted or transplantation or implant or implants or implanted or implanting or implantation or implantations or graft or grafted or grafts or grafting or homograft or homografted or homografts or homografting or allograft or allografts or allografting or allografted or xenograft or xenografts or xenografted or xenografting or autograft or autografts or autografted or autografting or prostheses or prosthesis or prosthetic or bypass or rod or rods or intramedullary nail or intramedullary nails or IM nail or IM nails or cephalomedullary nail or cephalomedullary nails or screw or screws or pin or pins or cage or cages or diversion or drainage or drain or drained or draining or drains or debride or debrides or debridement or fuse or fused or fusing or fusion or fusions or traction or tractions or mobilization or mobilisation or manipulation or manipulations or revascularize or revascularized or revascularization or revascularizations or revascularizes or replacement or replacements or lengthen or lengthens or lengthening or distraction or fixation or fixations or fixate or fixated or fixating or nonunion or ORIF or reduction or reductions or salvage or salvages or salvaging or reconstruct or reconstructs or reconstruction or reconstructions or reconstructed or harvest or harvests or harvested or harvesting).ti,ab. | 6968789 |
| #10             | 8 and 9                                                                                                                                                                                                                                                                                                                                                                                                                                                                                                                                                                                                                                                                                                                                                                                                                                                                                                                                                                                                                                                                                                                                                                                                                                                                                                                                                                                                                                                                                                                                                                                                                                                                                                                                                                                                                                                                              | 1668319 |
| #11             | 4 or 7 or 10                                                                                                                                                                                                                                                                                                                                                                                                                                                                                                                                                                                                                                                                                                                                                                                                                                                                                                                                                                                                                                                                                                                                                                                                                                                                                                                                                                                                                                                                                                                                                                                                                                                                                                                                                                                                                                                                         | 1909961 |
| #12             | (pain or pains or painful).ti,ab.                                                                                                                                                                                                                                                                                                                                                                                                                                                                                                                                                                                                                                                                                                                                                                                                                                                                                                                                                                                                                                                                                                                                                                                                                                                                                                                                                                                                                                                                                                                                                                                                                                                                                                                                                                                                                                                    | 993847  |
| #13             | (musculoskeletal or MSK or cartilage or cartilages or fibrocartilage or Fibrocartilages or fascia or fascial or ligament or ligaments or connective tissue or connective tissues or entheses or entheses or muscular or bone or bones or joint or joints or tendon or tendons or meniscus or meniscal or spine or spinal or low back or lower back or upper back or lumbar or vertebrae or vertebral or intervertebral or disc or discs or cervical or thoracic or pelvis or pelvic or neck or arm or arms or elbow or elbows or shoulder or shoulders or glenohumeral or glenohumerous or wrist or wrists or hand or hands or carpal or metacarpal or palmar or interphalangeal or phalanges or finger or fingers or knuckle or knuckles or rotator or sacroiliac or rib or ribs or flank or flanks or diaphragm or clavicle or sternum or sternal or chest or hip or hips or leg or legs or knee or knees or ankle or ankles or foot or feet or tarsal or metatarsals or plantar or toe or toes or myofascial or tendon or tendons or jaw or jaws or mandible or mandibular or skull or skulls or cranium or cranial or extremity or extremities or limb or limbs).ti,ab.                                                                                                                                                                                                                                                                                                                                                                                                                                                                                                                                                                                                                                                                                                          | 4904817 |
| #14             | 12 ADJ3 13                                                                                                                                                                                                                                                                                                                                                                                                                                                                                                                                                                                                                                                                                                                                                                                                                                                                                                                                                                                                                                                                                                                                                                                                                                                                                                                                                                                                                                                                                                                                                                                                                                                                                                                                                                                                                                                                           | 266281  |
| <i>MSK pain</i> |                                                                                                                                                                                                                                                                                                                                                                                                                                                                                                                                                                                                                                                                                                                                                                                                                                                                                                                                                                                                                                                                                                                                                                                                                                                                                                                                                                                                                                                                                                                                                                                                                                                                                                                                                                                                                                                                                      |         |
| #15             | 11 or 14                                                                                                                                                                                                                                                                                                                                                                                                                                                                                                                                                                                                                                                                                                                                                                                                                                                                                                                                                                                                                                                                                                                                                                                                                                                                                                                                                                                                                                                                                                                                                                                                                                                                                                                                                                                                                                                                             | 2087644 |



|                                      |                                                                                                                                                                                                                                                                                                                                                                                                                                                                                                                                                                                                                                                                                                                                                                                                                                                                                                                                                                                                                                                                                                                                                                                                                                                                                                                                                                                                                                                                                                                                                                                                                                                                                                                                                                                                                                                                                                                                                                                                                                                                                                                                                                                                                                                                                                                                                                                                                                                                                                                                                                                                                                                                                                                                                                                                                                                                                                                                                                                                                                                                         |         |
|--------------------------------------|-------------------------------------------------------------------------------------------------------------------------------------------------------------------------------------------------------------------------------------------------------------------------------------------------------------------------------------------------------------------------------------------------------------------------------------------------------------------------------------------------------------------------------------------------------------------------------------------------------------------------------------------------------------------------------------------------------------------------------------------------------------------------------------------------------------------------------------------------------------------------------------------------------------------------------------------------------------------------------------------------------------------------------------------------------------------------------------------------------------------------------------------------------------------------------------------------------------------------------------------------------------------------------------------------------------------------------------------------------------------------------------------------------------------------------------------------------------------------------------------------------------------------------------------------------------------------------------------------------------------------------------------------------------------------------------------------------------------------------------------------------------------------------------------------------------------------------------------------------------------------------------------------------------------------------------------------------------------------------------------------------------------------------------------------------------------------------------------------------------------------------------------------------------------------------------------------------------------------------------------------------------------------------------------------------------------------------------------------------------------------------------------------------------------------------------------------------------------------------------------------------------------------------------------------------------------------------------------------------------------------------------------------------------------------------------------------------------------------------------------------------------------------------------------------------------------------------------------------------------------------------------------------------------------------------------------------------------------------------------------------------------------------------------------------------------------------|---------|
| #16<br><i>Trauma, ortho-specific</i> | injury/ or exp accidental injury/ or exp traumatic amputation/ or exp fracture/ or exp ankle fracture/ or exp femur fracture/ or exp fracture dislocation/ or exp avulsion fracture/ or exp comminuted fracture/ or exp compression fracture/ or exp fracture nonunion/ or exp multiple fracture/ or exp open fracture/ or exp pathologic fracture/ or exp stress fracture/ or exp humerus fracture/ or exp intraarticular fracture/ or exp fragility fracture/ or exp periprosthetic fracture/ or exp radius fracture/ or exp rib fracture/ or exp shoulder fracture/ or exp skull fracture/ or exp spine fracture/ or exp tibia fracture/ or exp ulna fracture/ or exp cartilage fracture/ or exp arm injury/ or exp forearm injury/ or exp wrist injury/ or exp sport injury/ or exp spine injury/ or exp barotrauma/ or exp blast injury/ or exp crush trauma/ or exp hand injury/ or exp finger injury/ or exp hip injury/ or exp hip dislocation/ or exp joint dislocation/ or exp joint dislocation/ or exp muscle diastasis/ or exp patella dislocation/ or exp shoulder dislocation/ or exp leg injury/ or exp ankle injury/ or exp foot injury/ or exp knee injury/ or exp medial tibial stress syndrome/ or exp knee meniscus rupture/ or neck injury/ or exp whiplash injury/ or exp shoulder injury/ or exp rotator cuff injury/ or exp shoulder impingement syndrome/ or exp microtrauma/ or exp multiple trauma/ or exp emergency health service/ or exp blunt trauma/ or exp penetrating trauma/ or exp cumulative trauma disorder/ or exp tendon injury/ or exp gunshot injury/ or exp stab wound/ or exp falling/ or 'traffic accident'/ or (trauma or traumas or traumatic or polytrauma or barotrauma or injury or injuries or injured or injure or injuring or wound or wounds or wounded or dislocation or dislocations or dislocate or dislocates or dislocated or diastasis or rupture or ruptures or ruptured or impingement or impingements or disarticulation or disarticulations or disarticulated or disarticulate or disarticulates or disarticulating or sprain or sprains or sprained or tear or tears or torn or whiplash or blunt or crush or crushed or penetrate or penetrates or penetrating or penetrated or penetration or nonpenetrating or non penetrating or fracture or fractures or fractured or nonunion or malunited or lacerate or lacerates or lacerated or laceration or lacerations or perforation or perforations or perforate or perforates or perforated or falls or falling or motor vehicle collision or motor vehicle collisions or motor vehicle accident or motor vehicle accidents or motor vehicle crash or car accident or car accidents or car crash or vehicular accident or vehicular accidents or vehicular collision or vehicular collisions or vehicular crash or traffic accident or traffic accidents or MVC or traffic crash or automobile crash or automobile collision or automobile collisions or automobile accident or gunshot or gun shot or firearm or firearms or stab or stabbed).ti,ab. | 2651427 |
| #17                                  | 3 and 15 and 16                                                                                                                                                                                                                                                                                                                                                                                                                                                                                                                                                                                                                                                                                                                                                                                                                                                                                                                                                                                                                                                                                                                                                                                                                                                                                                                                                                                                                                                                                                                                                                                                                                                                                                                                                                                                                                                                                                                                                                                                                                                                                                                                                                                                                                                                                                                                                                                                                                                                                                                                                                                                                                                                                                                                                                                                                                                                                                                                                                                                                                                         | 11663   |
| #18                                  | Limit 17 to English language                                                                                                                                                                                                                                                                                                                                                                                                                                                                                                                                                                                                                                                                                                                                                                                                                                                                                                                                                                                                                                                                                                                                                                                                                                                                                                                                                                                                                                                                                                                                                                                                                                                                                                                                                                                                                                                                                                                                                                                                                                                                                                                                                                                                                                                                                                                                                                                                                                                                                                                                                                                                                                                                                                                                                                                                                                                                                                                                                                                                                                            | 10783   |
| #19                                  | Limit 18 to humans                                                                                                                                                                                                                                                                                                                                                                                                                                                                                                                                                                                                                                                                                                                                                                                                                                                                                                                                                                                                                                                                                                                                                                                                                                                                                                                                                                                                                                                                                                                                                                                                                                                                                                                                                                                                                                                                                                                                                                                                                                                                                                                                                                                                                                                                                                                                                                                                                                                                                                                                                                                                                                                                                                                                                                                                                                                                                                                                                                                                                                                      | 9073    |
| #20                                  | 19 not (case reports.pt or editorial.pt or letter.pt or comment.pt or conference.pt or conference abstract.pt or conference review.pt)                                                                                                                                                                                                                                                                                                                                                                                                                                                                                                                                                                                                                                                                                                                                                                                                                                                                                                                                                                                                                                                                                                                                                                                                                                                                                                                                                                                                                                                                                                                                                                                                                                                                                                                                                                                                                                                                                                                                                                                                                                                                                                                                                                                                                                                                                                                                                                                                                                                                                                                                                                                                                                                                                                                                                                                                                                                                                                                                  | 4801    |

**Search update: Embase 1947 to 2021 February 24**

Search date: 2/25/2021

| Search Set | Search Strategy                                                                                                                                                                                                                                                                                                                                                                                                                                                                                                                                                                                                                                                                                                                                                                                                                                                                                                                                                                                                                                                                                                                                                                                                                                                                                                                                                                                                                                                                                                                                                                                                                                                                                                                                                                                                                                                                                                                                                                                                                                                                                     | Results |
|------------|-----------------------------------------------------------------------------------------------------------------------------------------------------------------------------------------------------------------------------------------------------------------------------------------------------------------------------------------------------------------------------------------------------------------------------------------------------------------------------------------------------------------------------------------------------------------------------------------------------------------------------------------------------------------------------------------------------------------------------------------------------------------------------------------------------------------------------------------------------------------------------------------------------------------------------------------------------------------------------------------------------------------------------------------------------------------------------------------------------------------------------------------------------------------------------------------------------------------------------------------------------------------------------------------------------------------------------------------------------------------------------------------------------------------------------------------------------------------------------------------------------------------------------------------------------------------------------------------------------------------------------------------------------------------------------------------------------------------------------------------------------------------------------------------------------------------------------------------------------------------------------------------------------------------------------------------------------------------------------------------------------------------------------------------------------------------------------------------------------|---------|
| #1         | <p>("nonsteroid antiinflammatory agents" or "nonsteroid antiinflammatory agent" or "nonsteroid anti-inflammatory agents" or "nonsteroid anti-inflammatory agent" or "non-steroid antiinflammatory agents" or "non-steroid antiinflammatory agent" or "non-steroid anti-inflammatory agents" or "non-steroid anti-inflammatory agent" or "non-steroidal antiinflammatory agents" or "nonsteroidal antiinflammatory agent" or "nonsteroidal anti-inflammatory agents" or "nonsteroidal anti-inflammatory agent" or "non-steroidal anti-inflammatory agents" or "non-steroidal anti-inflammatory agent" or "nonsteroid antiinflammatory drugs" or "nonsteroid antiinflammatory drug" or "nonsteroid anti-inflammatory drugs" or "nonsteroid anti-inflammatory drug" or non-steroid antiinflammatory drugs or "non-steroid antiinflammatory drug" or "non-steroid anti-inflammatory drugs" or "non-steroid anti-inflammatory drug" or "nonsteroidal antiinflammatory drugs" or "nonsteroidal antiinflammatory drug" or "nonsteroidal anti-inflammatory drugs" or "nonsteroidal anti-inflammatory drug" or "non-steroidal antiinflammatory drugs" or "non-steroidal antiinflammatory drug" or "non-steroidal anti-inflammatory drugs" or "non-steroidal antiinflammatory drug" or NSAID or NSAIDs or apazone or aspirin or "acetylsalicylic acid" or "salicylic acid" or salsalate or bromfenac or celecoxib or Celebrex or dexibuprofen or dexketoprofen or diclofenac or voltaren or aceclofenac or diflunisal or droxicam or etodolac or etoricoxib or fenoprofen or "flufenamic acid" or flurbiprofen or ibuprofen or ibuprofen or advil or motrin or indomethacin or indomethacin or Indocin or ketoprofen or ketorolac or toradol or loxoprofen or "Meclofenamate sodium" or "mefenamic acid" or "meclofenamic acid" or meloxicam or nabumetone or naproxen or aleve or anaprox or naprelan or naprosyn or nefopam or nimesulide or oxaprozin or parecoxib or piroxicam or phenylbutazone or salsalate or sulindac or tenoxicam or "tiaprofenic acid" or "tolfenamic acid" or tolmetin).ti,ab.</p> | 262182  |
| #2         | <p>(Opioid or Opioids or Opiate or Opiates or Narcotic or Narcotics or Dihydroetorphine or Vicodin or acrylfentanyl or alfentanil or alphaprodine or "beta-casomorphin" or "beta-casomorphins" or Butorphanol or Beforal or Moradol or Stadol or Torbugesic or Dolorex or "Buprenorphine Naloxone" or Suboxone or carfentanil or Codeine or Ardinex or Isocodeine or crotonylfentanyl or cyclopropylfentanyl or deltorphin or dermorphin or desomorphine or krokodil or Dextromoramide or Pyrrolamidol or "D-Moramide" or Palfium or Dextropropoxyphene or Propoxyphene or Darvon or dezocine or dihydrocodeine or paramol or Rikodeine or Tiamon or Tosidrin or Contugesic or Dicodin or Paracodin or Paracodina or Dihydromorphine or Paramorfan or Paramorphan or Diphenoxylate or dynorphin or dynorphins or dinorphan or dinorphins or endomorphin or Enkephalin or eseroline or Ethylketocyclazocine or Ethylketazocine or Ethylmorphine or Trachyl or Dionine or Etorphine or Ethorphine or</p>                                                                                                                                                                                                                                                                                                                                                                                                                                                                                                                                                                                                                                                                                                                                                                                                                                                                                                                                                                                                                                                                                              | 295127  |

|    |                                                                                                                                                                                                                                                                                                                                                                                                                                                                                                                                                                                                                                                                                                                                                                                                                                                                                                                                                                                                                                                                                                                                                                                                                                                                                                                                                                                                                                                                                                                                                                                                                                                                                                                                                                                                                                                                                                                                                                                                                                                                                                                                                                                                                                                                                                                                                                                                                                                                                                                                                                                                                                                                                                                                                                                                                                                                          |        |
|----|--------------------------------------------------------------------------------------------------------------------------------------------------------------------------------------------------------------------------------------------------------------------------------------------------------------------------------------------------------------------------------------------------------------------------------------------------------------------------------------------------------------------------------------------------------------------------------------------------------------------------------------------------------------------------------------------------------------------------------------------------------------------------------------------------------------------------------------------------------------------------------------------------------------------------------------------------------------------------------------------------------------------------------------------------------------------------------------------------------------------------------------------------------------------------------------------------------------------------------------------------------------------------------------------------------------------------------------------------------------------------------------------------------------------------------------------------------------------------------------------------------------------------------------------------------------------------------------------------------------------------------------------------------------------------------------------------------------------------------------------------------------------------------------------------------------------------------------------------------------------------------------------------------------------------------------------------------------------------------------------------------------------------------------------------------------------------------------------------------------------------------------------------------------------------------------------------------------------------------------------------------------------------------------------------------------------------------------------------------------------------------------------------------------------------------------------------------------------------------------------------------------------------------------------------------------------------------------------------------------------------------------------------------------------------------------------------------------------------------------------------------------------------------------------------------------------------------------------------------------------------|--------|
|    | Fentanyl or Phentanyl or Fentanest or Sublimaze or Duragesic or Durogesic or Fentora or Heroin or Diacetylmorphine or Diamorphine or Diagesil or Diamorf or Hydrocodone or Hydrocodon or Dihydrocodeinone or Dicodid or Robidone or Hydrocon or Codinovo or Hycodan or Hycon or Hydromorphone or Dihydromorphinone or Hydromorphon or Palladone or Laudacon or Dilaudid or ketobemidone or cetobemidon or Levorphanol or levodroman or levorphan or levorphanol or lofentanil or lofentanyl or Meperidine or Pethidine or Isonipecaïn or Dolsin or Dolosal or Dolin or Operidine or Dolantin or Dolargan or Lidol or Lydol or Demerol or Dolcontral or Meptazinol or Metid or Methadone or Biodone or Dolophine or Metadol or Metasedin or Symoron or Methadose or Methex or Phenadone or Physeptone or Phymet or Pinadone or Amidone or Acetylmethadol or Alphacetylmethadol or Amidolacetate or Dimepheptanol or Levoacetylmethadol or Methadol or Acemethadone or Levomethadyl or Morphine or Morphia or "MS Contin" or Oramorph or Duramorph or Nalbuphine or Nubain or nocistatin or normethadone or Opium or Papaveretum or Omnopon or Pantopon or Oxycodone or Dihydrone or Oxycone or Dihydrohydroxycodone or Oxycodone or Eucodal or Theocodin or Oxycontin or Pancodine or Dinarkon or Oxiconum or Oxymorphone or Numorphan or Opana or paracymethadol or noracetylmethadol or Pentazocine or Lexir or Talwin or Fortral or Phenazocine or Phenethylazocine or Phenbenzorphane or Narphen or Phenoperidine or Fenoperidine or Lealgin or Operidine or Pirinitramide or Piritramid or Piritramide or Dipidolor or Dipydolor or Promedol or Dimethylmeperidine or Trimeperidine or Isopromedol or protopine or fumarine or Remifentanil or Ultiva or Sufentanil or Sulfentanyl or Sulfentanil or Sufenta or Tapentadol or Nucynta or Tilidine or Tilidate or Tilidin or Valoron or Valerone or Tramadol or Tramundin or biodalgic or Jutadol or Nobligan or Prontofort or Zytram or Takadol or Theradol or Tiral or Topalgic or Tradol or Tradolpuren or Tradonal or Tralgiol or Trama or TramaDorsch or Biokanol or Tramabeta or Tramadin or Tramadoc or Ranitidin or Trasedal or Ultram or Xymel or Zamudol or Zumalgic or Zydol or Tramadura or Tramagetic or Tramagit or Tramake or Tramal or Tramex or Adolonta or Contramal or Amadol or Skudexa Abstral or Actiq or Anexsia or Avinza or Butrans or co-gesic or Demerol or Dolophine or embeda or Exalgo or Fentora or hycet or hydromet or Hysingla or Kadian or liquicet or Lorcet or Lortab or Norco or Nucynta or Onsolis or Oramorph or oxycet or Oxaydo or Oxycontin or Percocet or Percodan or rezira or Roxanol or Roxicet or sublimaze or targiniq or tussionex or tuzistra or xtampza or Vicodin or vicoprofen or vituz or xartemis or xodol or Zohydro or zolvit or zutripro or zydone).ti,ab. |        |
| #3 | 1 or 2                                                                                                                                                                                                                                                                                                                                                                                                                                                                                                                                                                                                                                                                                                                                                                                                                                                                                                                                                                                                                                                                                                                                                                                                                                                                                                                                                                                                                                                                                                                                                                                                                                                                                                                                                                                                                                                                                                                                                                                                                                                                                                                                                                                                                                                                                                                                                                                                                                                                                                                                                                                                                                                                                                                                                                                                                                                                   | 541624 |
| #4 | exp orthopedic surgery/ or exp ulnar collateral ligament reconstruction/ or exp acetabuloplasty/ or exp amputation/ or exp disarticulation/ or exp hemipelvectomy/ or exp arthrodesis/ or exp arthroplasty/ or exp anterior cruciate ligament reconstruction/ or exp bone transplantation/ or exp posterior cruciate ligament reconstruction/ or exp arthroscopy/ or exp capsular release/ or exp Ilizarov technique/ or exp distraction osteogenesis/ or exp fracture fixation/ or exp closed fracture reduction/ or exp open fracture reduction/ or exp limb salvage/ or exp meniscectomy/ or exp osteotomy/ or exp alveolar bone grafting/ or exp                                                                                                                                                                                                                                                                                                                                                                                                                                                                                                                                                                                                                                                                                                                                                                                                                                                                                                                                                                                                                                                                                                                                                                                                                                                                                                                                                                                                                                                                                                                                                                                                                                                                                                                                                                                                                                                                                                                                                                                                                                                                                                                                                                                                                     | 662235 |

|    |                                                                                                                                                                                                                                                                                                                                                                                                                                                                                                                                                                                                                                                                                                                                                                                                                                                                                                                                                                                                                                                                                                                                                                                                                                                                                                                                                                                                                                     |         |
|----|-------------------------------------------------------------------------------------------------------------------------------------------------------------------------------------------------------------------------------------------------------------------------------------------------------------------------------------------------------------------------------------------------------------------------------------------------------------------------------------------------------------------------------------------------------------------------------------------------------------------------------------------------------------------------------------------------------------------------------------------------------------------------------------------------------------------------------------------------------------------------------------------------------------------------------------------------------------------------------------------------------------------------------------------------------------------------------------------------------------------------------------------------------------------------------------------------------------------------------------------------------------------------------------------------------------------------------------------------------------------------------------------------------------------------------------|---------|
|    | tenodesis/ or exp tenotomy/ or (orthopedic or orthopedics or orthopaedic or orthopaedics or acetabuloplasty or acetabuloplasties or amputation or amputations or amputate or amputates or amputated or amputating or hemipelvectomy or hemipelvectomies or arthrodesis or arthrodeses or arthroplasties or hemiarthroplasty or hemiarthroplasties or bone grafting or arthroscopy or arthroscopies or arthroscopic or joint capsule release or bone lengthening or Ilizarov Technique or Ilizarov Method or distraction osteogenesis or bone transplantation or bone transplantations or bone transplant or bone transplants).ti,ab.                                                                                                                                                                                                                                                                                                                                                                                                                                                                                                                                                                                                                                                                                                                                                                                                |         |
| #5 | (fracture or fractures or meniscectomy or meniscectomies or osteotomy or osteotomies or tenodesis or tenodeses or tenotomy or tenotomies or tendon release).ti,ab.                                                                                                                                                                                                                                                                                                                                                                                                                                                                                                                                                                                                                                                                                                                                                                                                                                                                                                                                                                                                                                                                                                                                                                                                                                                                  | 383715  |
| #6 | (fixation or fixations or reduction or reductions).ti,ab.                                                                                                                                                                                                                                                                                                                                                                                                                                                                                                                                                                                                                                                                                                                                                                                                                                                                                                                                                                                                                                                                                                                                                                                                                                                                                                                                                                           | 1778605 |
| #7 | 5 and 6                                                                                                                                                                                                                                                                                                                                                                                                                                                                                                                                                                                                                                                                                                                                                                                                                                                                                                                                                                                                                                                                                                                                                                                                                                                                                                                                                                                                                             | 82785   |
| #8 | (cranial or cranium or jaw or mandible or maxillofacial or maxilla-mandibular or orthognathic or vertebrae or vertebral or lumbar or thoracic or cervical or ilium or ilial or iliac wing or ischial or ischium or sacral or sacrum or pelvic or pelvis or pubis or symphysis or acetabulum or acetabular or ankle or ankles or calcaneus or foot or feet or midfoot or forefoot or femur or femurs or femoral or tibia or tibias or fibula or fibulas or tibial or knee or knees or patella or patellar or hip or hips or intervertebral or atlanto-axial or gleno-humeral or glenohumeral or shoulder or shoulders or humerus or humeral or ulnar or ulna or radius or radial or forearm or forearms or scapula or scapulas or scapular or costal or intracostal or intercostal or clavicle or clavicles or clavicular or sternum or sternums or sternal or elbow or elbows or wrist or wrists or hand or hands or interphalangeal or interphalangeal or tarsal or tarsals or metatarsal or metatarsals or carpal or phalanges or bone or bones or skeletal or skeleton or skeletons or fracture or fractures or intramedullary or joint or joints or limb or limbs or costochondral or cartilage or rib or ribs or talus or talar or metacarpal or carpal or tendon or tendons or ligament or ligaments or muscle or muscles or ACL or meniscus or meniscal or intraarticular or intra-articular or synovial or synovium).ti,ab. | 4888755 |
| #9 | (electrosurgery or electrosurgeries or electrosurgical or radiosurgery or radiosurgeries or radiosurgical or surgery or surgeries or surgical or operative or operation or operations or dissect or dissected or dissection or dissections or dissecting or microdissect or microdissected or microdissection or microdissections or microdissecting or cauter or cauterization or cauterizations or cauterize or cauterizes or cauterized or transplant or transplants or transplanting or transplanted or transplantation or implant or implants or implanted or implanting or implantation or implantations or graft or grafted or grafts or grafting or homograft or homografted or homografts or homografting or allograft or allografts or allografting or allografted or xenograft or xenografts or xenografted or xenografting or autograft or autografts or autografted or autografting or prostheses or prosthesis or prosthetic or bypass or rod or rods or intramedullary nail or intramedullary nails or IM nail or IM nails or cephalomedullary nail or cephalomedullary nails or screw or screws or pin or pins or cage or cages or diversion or drainage or drain or drained or draining or drains or debride or debrides or debridement or fuse or fused or fusing or fusion or fusions or traction or tractions or mobilization or                                                                                | 7414171 |

|                               |                                                                                                                                                                                                                                                                                                                                                                                                                                                                                                                                                                                                                                                                                                                                                                                                                                                                                                                                                                                                                                                                                                                                                                                                                                                                                                                                                                                                                                                                  |         |
|-------------------------------|------------------------------------------------------------------------------------------------------------------------------------------------------------------------------------------------------------------------------------------------------------------------------------------------------------------------------------------------------------------------------------------------------------------------------------------------------------------------------------------------------------------------------------------------------------------------------------------------------------------------------------------------------------------------------------------------------------------------------------------------------------------------------------------------------------------------------------------------------------------------------------------------------------------------------------------------------------------------------------------------------------------------------------------------------------------------------------------------------------------------------------------------------------------------------------------------------------------------------------------------------------------------------------------------------------------------------------------------------------------------------------------------------------------------------------------------------------------|---------|
|                               | mobilisation or manipulation or manipulations or revascularize or revascularized or revascularization or revascularizations or revascularizes or replacement or replacements or lengthen or lengthens or lengthening or distraction or fixation or fixations or fixate or fixated or fixating or nonunion or ORIF or reduction or reductions or salvage or salvages or salvaging or reconstruct or reconstructs or reconstruction or reconstructions or reconstructed or harvest or harvests or harvested or harvesting).ti,ab.                                                                                                                                                                                                                                                                                                                                                                                                                                                                                                                                                                                                                                                                                                                                                                                                                                                                                                                                  |         |
| #10                           | 8 and 9                                                                                                                                                                                                                                                                                                                                                                                                                                                                                                                                                                                                                                                                                                                                                                                                                                                                                                                                                                                                                                                                                                                                                                                                                                                                                                                                                                                                                                                          | 1774880 |
| #11                           | 4 or 7 or 10                                                                                                                                                                                                                                                                                                                                                                                                                                                                                                                                                                                                                                                                                                                                                                                                                                                                                                                                                                                                                                                                                                                                                                                                                                                                                                                                                                                                                                                     | 2031029 |
| #12                           | (pain or pains or painful).ti,ab.                                                                                                                                                                                                                                                                                                                                                                                                                                                                                                                                                                                                                                                                                                                                                                                                                                                                                                                                                                                                                                                                                                                                                                                                                                                                                                                                                                                                                                | 1069262 |
| #13                           | (musculoskeletal or MSK or cartilage or cartilages or fibrocartilage or Fibrocartilages or fascia or fascial or ligament or ligaments or connective tissue or connective tissues or entheses or entheses or muscular or bone or bones or joint or joints or tendon or tendons or meniscus or meniscal or spine or spinal or low back or lower back or upper back or lumbar or vertebrae or vertebral or intervertebral or disc or discs or cervical or thoracic or pelvis or pelvic or neck or arm or arms or elbow or elbows or shoulder or shoulders or glenohumeral or glenohumerous or wrist or wrists or hand or hands or carpal or metacarpal or palmar or interphalangeal or phalanges or finger or fingers or knuckle or knuckles or rotator or sacroiliac or rib or ribs or flank or flanks or diaphragm or clavicle or sternum or sternal or chest or hip or hips or leg or legs or knee or knees or ankle or ankles or foot or feet or tarsal or metatarsals or plantar or toe or toes or myofascial or tendon or tendons or jaw or jaws or mandible or mandibular or skull or skulls or cranium or cranial or extremity or extremities or limb or limbs).ti,ab.                                                                                                                                                                                                                                                                                      | 5204798 |
| #14                           | 12 ADJ3 13                                                                                                                                                                                                                                                                                                                                                                                                                                                                                                                                                                                                                                                                                                                                                                                                                                                                                                                                                                                                                                                                                                                                                                                                                                                                                                                                                                                                                                                       | 287657  |
| <i>MSK pain</i>               |                                                                                                                                                                                                                                                                                                                                                                                                                                                                                                                                                                                                                                                                                                                                                                                                                                                                                                                                                                                                                                                                                                                                                                                                                                                                                                                                                                                                                                                                  |         |
| #15                           | 11 or 14                                                                                                                                                                                                                                                                                                                                                                                                                                                                                                                                                                                                                                                                                                                                                                                                                                                                                                                                                                                                                                                                                                                                                                                                                                                                                                                                                                                                                                                         | 2222209 |
| #16                           | injury/ or exp accidental injury/ or exp traumatic amputation/ or exp fracture/ or exp ankle fracture/ or exp femur fracture/ or exp fracture dislocation/ or exp avulsion fracture/ or exp comminuted fracture/ or exp compression fracture/ or exp fracture nonunion/ or exp multiple fracture/ or exp open fracture/ or exp pathologic fracture/ or exp stress fracture/ or exp humerus fracture/ or exp intraarticular fracture/ or exp fragility fracture/ or exp periprosthetic fracture/ or exp radius fracture/ or exp rib fracture/ or exp shoulder fracture/ or exp skull fracture/ or exp spine fracture/ or exp tibia fracture/ or exp ulna fracture/ or exp cartilage fracture/ or exp arm injury/ or exp forearm injury/ or exp wrist injury/ or exp sport injury/ or exp spine injury/ or exp barotrauma/ or exp blast injury/ or exp crush trauma/ or exp hand injury/ or exp finger injury/ or exp hip injury/ or exp hip dislocation/ or exp joint dislocation/ or exp joint dislocation/ or exp muscle diastasis/ or exp patella dislocation/ or exp shoulder dislocation/ or exp leg injury/ or exp ankle injury/ or exp foot injury/ or exp knee injury/ or exp medial tibial stress syndrome/ or exp knee meniscus rupture/ or neck injury/ or exp whiplash injury/ or exp shoulder injury/ or exp rotator cuff injury/ or exp shoulder impingement syndrome/ or exp microtrauma/ or exp multiple trauma/ or exp emergency health service/ | 2833184 |
| <i>Trauma, ortho-specific</i> |                                                                                                                                                                                                                                                                                                                                                                                                                                                                                                                                                                                                                                                                                                                                                                                                                                                                                                                                                                                                                                                                                                                                                                                                                                                                                                                                                                                                                                                                  |         |

|     |                                                                                                                                                                                                                                                                                                                                                                                                                                                                                                                                                                                                                                                                                                                                                                                                                                                                                                                                                                                                                                                                                                                                                                                                                                                                                                                                                                                                                                                                                                                                                                                                        |       |
|-----|--------------------------------------------------------------------------------------------------------------------------------------------------------------------------------------------------------------------------------------------------------------------------------------------------------------------------------------------------------------------------------------------------------------------------------------------------------------------------------------------------------------------------------------------------------------------------------------------------------------------------------------------------------------------------------------------------------------------------------------------------------------------------------------------------------------------------------------------------------------------------------------------------------------------------------------------------------------------------------------------------------------------------------------------------------------------------------------------------------------------------------------------------------------------------------------------------------------------------------------------------------------------------------------------------------------------------------------------------------------------------------------------------------------------------------------------------------------------------------------------------------------------------------------------------------------------------------------------------------|-------|
|     | or exp blunt trauma/ or exp penetrating trauma/ or exp cumulative trauma disorder/ or exp tendon injury/ or exp gunshot injury/ or exp stab wound/ or exp falling/ or 'traffic accident'/ or (trauma or traumas or traumatic or polytrauma or barotrauma or injury or injuries or injured or injure or injuring or wound or wounds or wounded or dislocation or dislocations or dislocate or dislocates or dislocated or diastasis or rupture or ruptures or ruptured or impingement or impingements or disarticulation or disarticulations or disarticulated or disarticulate or disarticulates or disarticulating or sprain or sprains or sprained or tear or tears or torn or whiplash or blunt or crush or crushed or penetrate or penetrates or penetrating or penetrated or penetration or nonpenetrating or non penetrating or fracture or fractures or fractured or nonunion or malunited or lacerate or lacerates or lacerated or laceration or lacerations or perforation or perforations or perforate or perforates or perforated or falls or falling or motor vehicle collision or motor vehicle collisions or motor vehicle accident or motor vehicle accidents or motor vehicle crash or car accident or car accidents or car crash or vehicular accident or vehicular accidents or vehicular collision or vehicular collisions or vehicular crash or traffic accident or traffic accidents or MVC or traffic crash or automobile crash or automobile collision or automobile collisions or automobile accident or gunshot or gun shot or firearm or firearms or stab or stabbed).ti,ab. |       |
| #17 | 3 and 15 and 16                                                                                                                                                                                                                                                                                                                                                                                                                                                                                                                                                                                                                                                                                                                                                                                                                                                                                                                                                                                                                                                                                                                                                                                                                                                                                                                                                                                                                                                                                                                                                                                        | 12869 |
| #18 | Limit 17 to English language                                                                                                                                                                                                                                                                                                                                                                                                                                                                                                                                                                                                                                                                                                                                                                                                                                                                                                                                                                                                                                                                                                                                                                                                                                                                                                                                                                                                                                                                                                                                                                           | 11961 |
| #19 | Limit 18 to humans                                                                                                                                                                                                                                                                                                                                                                                                                                                                                                                                                                                                                                                                                                                                                                                                                                                                                                                                                                                                                                                                                                                                                                                                                                                                                                                                                                                                                                                                                                                                                                                     | 10171 |
| #20 | 19 not (case reports.pt or editorial.pt or letter.pt or comment.pt or conference.pt or conference abstract.pt or conference review.pt)                                                                                                                                                                                                                                                                                                                                                                                                                                                                                                                                                                                                                                                                                                                                                                                                                                                                                                                                                                                                                                                                                                                                                                                                                                                                                                                                                                                                                                                                 | 5347  |
| #21 | limit 20 to yr="2020 - 2022"                                                                                                                                                                                                                                                                                                                                                                                                                                                                                                                                                                                                                                                                                                                                                                                                                                                                                                                                                                                                                                                                                                                                                                                                                                                                                                                                                                                                                                                                                                                                                                           | 616   |

**Database: Cochrane Central Register of Controlled Trials (via Ovid)**

Search date: 3/19/2020

| Search Set          | Search Strategy                                                                                                                                                                                                                                                                                                                                                                                                                                                                                                                                                                                                                                                                                                                                                                                                                                                                                                                                                                                                                                                                                                                                                   | Results |
|---------------------|-------------------------------------------------------------------------------------------------------------------------------------------------------------------------------------------------------------------------------------------------------------------------------------------------------------------------------------------------------------------------------------------------------------------------------------------------------------------------------------------------------------------------------------------------------------------------------------------------------------------------------------------------------------------------------------------------------------------------------------------------------------------------------------------------------------------------------------------------------------------------------------------------------------------------------------------------------------------------------------------------------------------------------------------------------------------------------------------------------------------------------------------------------------------|---------|
| #1<br><i>NSAIDs</i> | exp Anti-Inflammatory Agents, Non-Steroidal/ or exp Diclofenac/ or exp Apazone/ or exp Aspirin/ or exp Celecoxib/ or exp Ibuprofen/ or exp Diclofenac/ or exp Diflunisal/ or exp Etodolac/ or exp Fenoprofen/ or exp Flufenamic Acid/ or exp Indomethacin/ or exp Ketoprofen/ or exp Ketorolac/ or exp Meclofenamic Acid/ or exp Mefenamic Acid/ or exp Meloxicam/ or exp Nabumetone/ or exp Naproxen/ or exp Nefopam/ or exp Oxaprozin/ or exp Piroxicam/ or exp Phenylbutazone/ or exp Sulindac/ or exp Tolmetin/ or ("nonsteroid antiinflammatory agents" or "nonsteroid antiinflammatory agent" or "nonsteroid anti-inflammatory agents" or "nonsteroid anti-inflammatory agent" or "non-steroid antiinflammatory agents" or "non-steroid anti-inflammatory agent" or "non-steroid anti-inflammatory agent" or "non-steroid anti-inflammatory agent" or "non-steroid anti-inflammatory agent" or "nonsteroidal antiinflammatory agents" or "nonsteroidal antiinflammatory agent" or "nonsteroidal anti-inflammatory agents" or "nonsteroidal anti-inflammatory agent" or "non-steroidal antiinflammatory agents" or "non-steroidal antiinflammatory agent" or | 44678   |



|                      |                                                                                                                                                                                                                                                                                                                                                                                                                                                                                                                                                                                                                                                                                                                                                                                                                                                                                                                                                                                                                                                                                                                                                                                                                                                                                                                                                                                                                                                                                                                                                                                                                                                                                                                                                                                                                                                                                                                                 |       |
|----------------------|---------------------------------------------------------------------------------------------------------------------------------------------------------------------------------------------------------------------------------------------------------------------------------------------------------------------------------------------------------------------------------------------------------------------------------------------------------------------------------------------------------------------------------------------------------------------------------------------------------------------------------------------------------------------------------------------------------------------------------------------------------------------------------------------------------------------------------------------------------------------------------------------------------------------------------------------------------------------------------------------------------------------------------------------------------------------------------------------------------------------------------------------------------------------------------------------------------------------------------------------------------------------------------------------------------------------------------------------------------------------------------------------------------------------------------------------------------------------------------------------------------------------------------------------------------------------------------------------------------------------------------------------------------------------------------------------------------------------------------------------------------------------------------------------------------------------------------------------------------------------------------------------------------------------------------|-------|
|                      | "non-steroidal anti-inflammatory agents" or "non-steroidal anti-inflammatory agent" or "nonsteroid antiinflammatory drugs" or "nonsteroid antiinflammatory drug" or "nonsteroid anti-inflammatory drugs" or "nonsteroid anti-inflammatory drug" or non-steroid antiinflammatory drugs or "non-steroid antiinflammatory drug" or "non-steroid anti-inflammatory drugs" or "non-steroid anti-inflammatory drug" or "nonsteroidal antiinflammatory drugs" or "nonsteroidal antiinflammatory drug" or "nonsteroidal anti-inflammatory drugs" or "nonsteroidal anti-inflammatory drug" or "non-steroidal antiinflammatory drugs" or "non-steroidal antiinflammatory drug" or "non-steroidal anti-inflammatory drug" or NSAID or NSAIDs or apazone or aspirin or "acetylsalicylic acid" or "salicylic acid" or salsalate or bromfenac or celecoxib or Celebrex or dexibuprofen or dexketoprofen or diclofenac or voltaren or aceclofenac or diflunisal or droxicam or etodolac or etoricoxib or fenoprofen or "flufenamic acid" or flurbiprofen or ibuprofen or ibuproxam or advil or motrin or indomethacin or indomethacin or Indocin or ketoprofen or ketorolac or toradol or loxoprofen or "Meclofenamate sodium" or "mefenamic acid" or "meclofenamic acid" or meloxicam or nabumetone or naproxen or aleve or anaprox or naprelan or naprosyn or nefopam or nimesulide or oxaprozin or parecoxib or piroxicam or phenylbutazone or salsalate or sulindac or tenoxicam or "tiaprofenic acid" or "tolfenamic acid" or tolmetin).ti,ab.                                                                                                                                                                                                                                                                                                                                                                                            |       |
| #2<br><i>Opioids</i> | exp Analgesics, Opioid/ or exp Alfentanil/ or exp Alphaprodine/ or exp Butorphanol/ or exp Buprenorphine, Naloxone Drug Combination/ or exp Codeine/ or exp Dextromoramide/ or exp Dextropropoxyphene/ or exp Dihydromorphone/ or exp Diphenoxylate/ or exp Ethylketocyclazocine/ or exp Ethylmorphine/ or exp Fentanyl/ or exp Heroin/ or exp Hydrocodone/ or exp Levorphanol/ or exp Meperidine/ or exp Meptazinol/ or exp Methadone/ or exp Methadyl Acetate/ or exp Morphine/ or exp Nalbuphine/ or exp Opiate Alkaloids/ or exp Opium/ or exp Oxycodone/ or exp Oxymorphone/ or exp Pentazocine/ or exp Phenazocine/ or exp Phenoperidine/ or exp Pirinitramide/ or exp Promedol/ or exp Remifentanil/ or exp Sufentanil/ or exp Tapentadol/ or exp Tilidine/ or exp Tramadol/ or (Opioid or Opioids or Opiate or Opiates or Narcotic or Narcotics or Dihydroetorphine or Vicodin or acrylfentanyl or alfentanil or alphaprodine or "beta-casomorphin" or "beta-casomorphins" or Butorphanol or Beforal or Moradol or Stadol or Torbugesic or Dolorex or "Buprenorphine Naloxone" or Suboxone or carfentanil or Codeine or Ardinex or Isocodeine or crotonylfentanyl or cyclopropylfentanyl or deltorphin or dermorphin or desomorphine or krokodil or Dextromoramide or Pyrrolamidol or "D-Moramide" or Palfium or Dextropropoxyphene or Propoxyphene or Darvon or dezocine or dihydrocodeine or paramol or Rikodeine or Tiamon or Tosidrin or Contugesic or Dicodin or Paracodin or Paracodina or Dihydromorphone or Paramorfan or Paramorphan or Diphenoxylate or dynorphin or dynorphins or dinorphin or dinorphins or endomorphin or Enkephalin or eseroline or Ethylketocyclazocine or Ethylmorphine or Trachyl or Dionine or Etorphine or Ethorphine or Fentanyl or Phentanyl or Fentanest or Sublimaze or Duragesic or Durogesic or Fentora or Heroin or Diacetylmorphine or Diamorphine or Diagesil or Diamorf or | 54921 |

|                               |                                                                                                                                                                                                                                                                                                                                                                                                                                                                                                                                                                                                                                                                                                                                                                                                                                                                                                                                                                                                                                                                                                                                                                                                                                                                                                                                                                                                                                                                                                                                                                                                                                                                                                                                                                                                                                                                                                                                                                                                                                                                                                                                                                                                                                                                                                                                                                                                                                                                                                                                                                                                                                                                                                |       |
|-------------------------------|------------------------------------------------------------------------------------------------------------------------------------------------------------------------------------------------------------------------------------------------------------------------------------------------------------------------------------------------------------------------------------------------------------------------------------------------------------------------------------------------------------------------------------------------------------------------------------------------------------------------------------------------------------------------------------------------------------------------------------------------------------------------------------------------------------------------------------------------------------------------------------------------------------------------------------------------------------------------------------------------------------------------------------------------------------------------------------------------------------------------------------------------------------------------------------------------------------------------------------------------------------------------------------------------------------------------------------------------------------------------------------------------------------------------------------------------------------------------------------------------------------------------------------------------------------------------------------------------------------------------------------------------------------------------------------------------------------------------------------------------------------------------------------------------------------------------------------------------------------------------------------------------------------------------------------------------------------------------------------------------------------------------------------------------------------------------------------------------------------------------------------------------------------------------------------------------------------------------------------------------------------------------------------------------------------------------------------------------------------------------------------------------------------------------------------------------------------------------------------------------------------------------------------------------------------------------------------------------------------------------------------------------------------------------------------------------|-------|
|                               | Hydrocodone or Hydrocodon or Dihydrocodeinone or Dicodid or Robidone or Hydrocon or Codinovo or Hycodan or Hycon or Hydromorphone or Dihydromorphinone or Hydromorphon or Palladone or Laudacon or Dilaudid or ketobemidone or cetobemidon or Levorphanol or levodroman or levorphan or levorphanol or lofentanil or lofantanyl or Meperidine or Pethidine or Isonipecaïn or Dolsin or Dolosal or Dolin or Operidine or Dolantin or Dolargan or Lidol or Lydol or Demerol or Dolcontral or Meptazinol or Metid or Methadone or Biodone or Dolophine or Metadol or Metasedin or Symoron or Methadose or Methex or Phenadone or Physeptone or Phymet or Pinadone or Amidone or Acetylmethadol or Alphacetylmethadol or Amidolacetate or Dimepheptanol or Levoacetylmethadol or Methadol or Acemethadone or Levomethadyl or Morphine or Morphia or "MS Contin" or Oramorph or Duramorph or Nalbuphine or Nubain or nocistatin or normethadone or Opium or Papaveretum or Omnopon or Pantopon or Oxycodone or Dihydrone or Oxycone or Dihydrohydroxycodone or Oxycodone or Eucodal or Theocodin or Oxycontin or Pancodine or Dinarkon or Oxiconum or Oxymorphone or Numorphan or Opana or paracymethadol or noracetylmethadol or Pentazocine or Lexir or Talwin or Fortral or Phenazocine or Phenethylazocine or Phenbenzorphane or Narphen or Phenoperidine or Fenoperidine or Lealgin or Operidine or Pirinitramide or Piritramid or Dipidolor or Dipydolor or Promedol or Dimethylmeperidine or Trimeperidine or Isopromedol or protopine or fumarine or Remifentanil or Ultiva or Sufentanil or Sulfentanyl or Sulfentanil or Sufenta or Tapentadol or Nucynta or Tilidine or Tilidate or Tilidin or Valeron or Valerone or Tramadol or Tramundin or biodalgic or Jutadol or Nobligan or Prontofort or Zytram or Takadol or Theradol or Tiral or Topalgic or Tradol or Tradolpuren or Tradonal or Tralgiol or Trama or TramaDorsch or Biokanol or Tramabeta or Tramadin or Tramadoc or Ranitidin or Trasedal or Ultram or Xymel or Zamudol or Zumalgic or Zydol or Tramadura or Tramagetic or Tramagit or Tramaque or Tramal or Tramex or Adolonta or Contramal or Amadol or Skudexa Abstral or Actiq or Anexsia or Avinza or Butrans or co-gesic or Demerol or Dolophine or embeda or Exalgo or Fentora or hycet or hydromet or Hysingla or Kadian or liquicet or Lorcet or Lortab or Norco or Nucynta or Onsolis or Oramorph or oxycet or Oxaydo or Oxycontin or Percocet or Percodan or rezira or Roxanol or Roxicet or sublimaze or targiniq or tussionex or tuzistra or xtampza or Vicodin or vicoprofen or vituz or xartemis or xodol or Zohydro or zolvit or zutripro or zydone).ti,ab. |       |
| #3                            | 1 or 2                                                                                                                                                                                                                                                                                                                                                                                                                                                                                                                                                                                                                                                                                                                                                                                                                                                                                                                                                                                                                                                                                                                                                                                                                                                                                                                                                                                                                                                                                                                                                                                                                                                                                                                                                                                                                                                                                                                                                                                                                                                                                                                                                                                                                                                                                                                                                                                                                                                                                                                                                                                                                                                                                         | 93280 |
| #4<br><i>Ortho procedures</i> | exp Orthopedic Procedures/ or exp Ulnar Collateral Ligament Reconstruction/ or exp Acetabuloplasty/ or exp Amputation/ or exp Disarticulation/ or exp Hemipelvectomy/ or exp Arthrodesis/ or exp Arthroplasty/ or exp Anterior Cruciate Ligament Reconstruction/ or exp Bone-Patellar Tendon-Bone Grafting/ or exp Arthroplasty, Subchondral/ or exp Posterior Cruciate Ligament Reconstruction/ or exp Arthroscopy/ or exp Joint Capsule Release/ or exp Bone lengthening/ or exp Ilizarov Technique/ or exp Osteogenesis, Distraction/ or exp Bone Transplantation/ or exp Fracture Fixation/ or exp Closed fracture reduction/ or exp Fracture Fixation, Internal/ or exp Open fracture reduction/ or exp Limb salvage/ or exp                                                                                                                                                                                                                                                                                                                                                                                                                                                                                                                                                                                                                                                                                                                                                                                                                                                                                                                                                                                                                                                                                                                                                                                                                                                                                                                                                                                                                                                                                                                                                                                                                                                                                                                                                                                                                                                                                                                                                              | 26100 |

|    |                                                                                                                                                                                                                                                                                                                                                                                                                                                                                                                                                                                                                                                                                                                                                                                                                                                                                                                                                                                                                                                                                                                                                                                                                                                                                                                                                                                                                                     |        |
|----|-------------------------------------------------------------------------------------------------------------------------------------------------------------------------------------------------------------------------------------------------------------------------------------------------------------------------------------------------------------------------------------------------------------------------------------------------------------------------------------------------------------------------------------------------------------------------------------------------------------------------------------------------------------------------------------------------------------------------------------------------------------------------------------------------------------------------------------------------------------------------------------------------------------------------------------------------------------------------------------------------------------------------------------------------------------------------------------------------------------------------------------------------------------------------------------------------------------------------------------------------------------------------------------------------------------------------------------------------------------------------------------------------------------------------------------|--------|
|    | Meniscectomy/ or exp Osteotomy/ or exp Alveolar Bone Grafting/ or exp Tenodesis/ or exp Tenotomy/ or (orthopedic or orthopedics or orthopaedic or orthopaedics or acetabuloplasty or acetabuloplasties or amputation or amputations or amputate or amputates or amputated or amputating or hemipelvectomy or hemipelvectomy or arthrodesis or arthrodeses or arthroplasties or hemiarthroplasty or hemiarthroplasties or bone grafting or arthroscopy or arthroscopies or arthroscopic or joint capsule release or bone lengthening or Ilizarov Technique or Ilizarov Method or distraction osteogenesis or bone transplantation or bone transplant or bone transplants).ti,ab.                                                                                                                                                                                                                                                                                                                                                                                                                                                                                                                                                                                                                                                                                                                                                     |        |
| #5 | (fracture or fractures or meniscectomy or meniscectomies or osteotomy or osteotomies or tenodesis or tenodeses or tenotomy or tenotomies or tendon release).ti,ab.                                                                                                                                                                                                                                                                                                                                                                                                                                                                                                                                                                                                                                                                                                                                                                                                                                                                                                                                                                                                                                                                                                                                                                                                                                                                  | 22059  |
| #6 | (fixation or fixations or reduction or reductions).ti,ab.                                                                                                                                                                                                                                                                                                                                                                                                                                                                                                                                                                                                                                                                                                                                                                                                                                                                                                                                                                                                                                                                                                                                                                                                                                                                                                                                                                           | 176858 |
| #7 | 5 and 6                                                                                                                                                                                                                                                                                                                                                                                                                                                                                                                                                                                                                                                                                                                                                                                                                                                                                                                                                                                                                                                                                                                                                                                                                                                                                                                                                                                                                             | 6274   |
| #8 | (cranial or cranium or jaw or mandible or maxillofacial or maxilla-mandibular or orthognathic or vertebrae or vertebral or lumbar or thoracic or cervical or ilium or ilial or iliac wing or ischial or ischium or sacral or sacrum or pelvic or pelvis or pubis or symphysis or acetabulum or acetabular or ankle or ankles or calcaneus or foot or feet or midfoot or forefoot or femur or femurs or femoral or tibia or tibias or fibula or fibulas or tibial or knee or knees or patella or patellar or hip or hips or intervertebral or atlanto-axial or gleno-humeral or glenohumeral or shoulder or shoulders or humerus or humeral or ulnar or ulna or radius or radial or forearm or forearms or scapula or scapulas or scapular or costal or intracostal or intercostal or clavicle or clavicles or clavicular or sternum or sternums or sternal or elbow or elbows or wrist or wrists or hand or hands or interphalangeal or interphalangeal or tarsal or tarsals or metatarsal or metatarsals or carpal or phalanges or bone or bones or skeletal or skeleton or skeletons or fracture or fractures or intramedullary or joint or joints or limb or limbs or costochondral or cartilage or rib or ribs or talus or talar or metacarpal or carpal or tendon or tendons or ligament or ligaments or muscle or muscles or ACL or meniscus or meniscal or intraarticular or intra-articular or synovial or synovium).ti,ab. | 268301 |
| #9 | (electrosurgery or electrosurgeries or electrosurgical or radiosurgery or radiosurgeries or radiosurgical or surgery or surgeries or surgical or operative or operation or operations or dissect or dissected or dissection or dissections or dissecting or microdissect or microdissected or microdissection or microdissections or microdissecting or cauter or cauterization or cauterizations or cauterize or cauterizes or cauterized or transplant or transplants or transplanting or transplanted or transplantation or implant or implants or implanted or implanting or implantation or implantations or graft or grafted or grafts or grafting or homograft or homografted or homografts or homografting or allograft or allografts or allografting or allografted or xenograft or xenografts or xenografted or xenografting or autograft or autografts or autografted or autografting or prostheses or prosthesis or prosthetic or bypass or rod or rods or intramedullary nail or intramedullary nails or IM nail or IM nails or cephalomedullary nail or cephalomedullary nails or screw or screws or pin or pins or cage or cages or diversion or drainage or drain or drained or draining or drains or debride or debrides or debridement or fuse or fused or fusing or                                                                                                                                              | 466444 |

|                                      |                                                                                                                                                                                                                                                                                                                                                                                                                                                                                                                                                                                                                                                                                                                                                                                                                                                                                                                                                                                                                                                                                                                                                                                                                                                                                                                                               |        |
|--------------------------------------|-----------------------------------------------------------------------------------------------------------------------------------------------------------------------------------------------------------------------------------------------------------------------------------------------------------------------------------------------------------------------------------------------------------------------------------------------------------------------------------------------------------------------------------------------------------------------------------------------------------------------------------------------------------------------------------------------------------------------------------------------------------------------------------------------------------------------------------------------------------------------------------------------------------------------------------------------------------------------------------------------------------------------------------------------------------------------------------------------------------------------------------------------------------------------------------------------------------------------------------------------------------------------------------------------------------------------------------------------|--------|
|                                      | fusion or fusions or traction or tractions or mobilization or mobilisation or manipulation or manipulations or revascularize or revascularized or revascularization or revascularizations or revascularizes or replacement or replacements or lengthen or lengthens or lengthening or distraction or fixation or fixations or fixate or fixated or fixating or nonunion or ORIF or reduction or reductions or salvage or salvages or salvaging or reconstruct or reconstructs or reconstruction or reconstructions or reconstructed or harvest or harvests or harvested or harvesting).ti,ab.                                                                                                                                                                                                                                                                                                                                                                                                                                                                                                                                                                                                                                                                                                                                                 |        |
| #10                                  | 8 and 9                                                                                                                                                                                                                                                                                                                                                                                                                                                                                                                                                                                                                                                                                                                                                                                                                                                                                                                                                                                                                                                                                                                                                                                                                                                                                                                                       | 114428 |
| #11                                  | 4 or 7 or 10                                                                                                                                                                                                                                                                                                                                                                                                                                                                                                                                                                                                                                                                                                                                                                                                                                                                                                                                                                                                                                                                                                                                                                                                                                                                                                                                  | 122411 |
| #12                                  | exp Pain/ or exp Pain management/ or (pain or pains or painful).ti,ab.                                                                                                                                                                                                                                                                                                                                                                                                                                                                                                                                                                                                                                                                                                                                                                                                                                                                                                                                                                                                                                                                                                                                                                                                                                                                        | 168881 |
| #13                                  | exp Musculoskeletal System/ or exp Extremities/ or exp Bones of Lower Extremity/ or exp Lower Extremity/ or exp Upper Extremity/ or exp Bones of Upper Extremity/ or (musculoskeletal or MSK or cartilage or cartilages or fibrocartilage or Fibrocartilages or fascia or fascial or ligament or ligaments or connective tissue or connective tissues or enthesis or entheses or muscular or bone or bones or joint or joints or tendon or tendons or meniscus or meniscal or spine or spinal or low back or lower back or upper back or lumbar or vertebrae or vertebral or intervertebral or disc or discs or cervical or thoracic or pelvis or pelvic or neck or arm or arms or elbow or elbows or shoulder or shoulders or glenohumeral or glenohumerous or wrist or wrists hand or hands or carpal or metacarpal or palmar or interphalangeal or phalanges or finger or fingers or knuckle or knuckles or rotator or sacroiliac or rib or ribs or flank or flanks or diaphragm or clavicle or sternum or sternal or chest or hip or hips or leg or legs or knee or knees or ankle or ankles or foot or feet or tarsal or metatarsals or plantar or toe or toes or myofascial or tendon or tendons or jaw or jaws or mandible or mandibular or skull or skulls or cranium or cranial or extremity or extremities or limb or limbs).ti,ab. | 370281 |
| #14<br><i>MSK pain</i>               | 12 and 13                                                                                                                                                                                                                                                                                                                                                                                                                                                                                                                                                                                                                                                                                                                                                                                                                                                                                                                                                                                                                                                                                                                                                                                                                                                                                                                                     | 85166  |
| #15                                  | 11 or 14                                                                                                                                                                                                                                                                                                                                                                                                                                                                                                                                                                                                                                                                                                                                                                                                                                                                                                                                                                                                                                                                                                                                                                                                                                                                                                                                      | 174172 |
| #16<br><i>Trauma, ortho-specific</i> | "Wounds and Injuries"/ or exp Accidental Injuries/ or exp Amputation, Traumatic/ or exp Fractures, Bone/ or exp Ankle Fractures/ or exp Femoral Fractures/ or exp Fracture Dislocation/ or exp Fractures, Avulsion/ or exp Fractures, Closed/ or exp Fractures, Comminuted/ or exp Fractures, Compression/ or exp Fractures, Malunited/ or exp Fractures, Multiple/ or exp Fractures, Open/ or exp Fractures, Spontaneous/ or exp Fractures, Stress/ or exp Fractures, Ununited/ or exp Humeral Fractures/ or exp Intra-Articular Fractures/ or exp Osteoporotic Fractures/ or exp Periprosthetic Fractures/ or exp Radius Fractures/ or exp Rib Fractures/ or exp Shoulder Fractures/ or exp Skull Fractures/ or exp Spinal Fractures/ or exp Tibial Fractures/ or exp Ulna Fractures/ or exp Fractures, Cartilage/ or exp Arm Injuries/ or exp Forearm Injuries/ or exp Wrist Injuries/ or exp Athletic Injuries/ or exp Back Injuries/ or exp Spinal Injuries/ or exp Barotrauma/ or exp Blast Injuries/ or exp Crush Injuries/ or exp Hand Injuries/ or exp Finger Injuries/ or exp Hip Injuries/ or exp Hip Dislocation/ or exp Joint Dislocations/ or exp Diastasis, Bone/ or exp Diastasis, Muscle/ or exp Patellar dislocation/ or exp Shoulder dislocation/ or exp Leg                                                               | 123616 |

|     |                                                                                                                                                                                                                                                                                                                                                                                                                                                                                                                                                                                                                                                                                                                                                                                                                                                                                                                                                                                                                                                                                                                                                                                                                                                                                                                                                                                                                                                                                                                                                                                                                                                                                                                                                                                                                                                                                                                                                                                                                                               |      |
|-----|-----------------------------------------------------------------------------------------------------------------------------------------------------------------------------------------------------------------------------------------------------------------------------------------------------------------------------------------------------------------------------------------------------------------------------------------------------------------------------------------------------------------------------------------------------------------------------------------------------------------------------------------------------------------------------------------------------------------------------------------------------------------------------------------------------------------------------------------------------------------------------------------------------------------------------------------------------------------------------------------------------------------------------------------------------------------------------------------------------------------------------------------------------------------------------------------------------------------------------------------------------------------------------------------------------------------------------------------------------------------------------------------------------------------------------------------------------------------------------------------------------------------------------------------------------------------------------------------------------------------------------------------------------------------------------------------------------------------------------------------------------------------------------------------------------------------------------------------------------------------------------------------------------------------------------------------------------------------------------------------------------------------------------------------------|------|
|     | Injuries/ or exp Ankle Injuries/ or exp Foot injuries/ or exp Knee Injuries/ or exp Medial Tibial Stress Syndrome/ or exp Tibial Meniscus Injuries/ or exp Neck Injuries/ or exp Whiplash injuries/ or exp Shoulder Injuries/ or exp Rotator Cuff Injuries/ or exp Shoulder impingement syndrome/ or exp Microtrauma, Physical/ or exp Multiple Trauma/ or exp Trauma Centers/ or Wounds, Nonpenetrating/ or exp Wounds, Penetrating/ or exp "Sprains and Strains"/ or exp Cumulative Trauma Disorders/ or exp Tendon Injuries/ or exp Wounds, Gunshot/ or exp Wounds, Stab/ or exp Accidental Falls/ or exp Accidents, Traffic/ or (trauma or traumas or traumatic or polytrauma or barotrauma or injury or injuries or injured or injure or injuring or wound or wounds or wounded or dislocation or dislocations or dislocate or dislocates or dislocated or diastasis or rupture or ruptures or ruptured or impingement or impingements or disarticulation or disarticulations or disarticulated or disarticulate or disarticulates or disarticulating or sprain or sprains or sprained or tear or tears or torn or whiplash or blunt or crush or crushed or penetrate or penetrates or penetrating or penetrated or penetration or nonpenetrating or non penetrating or fracture or fractures or fractured or nonunion or malunited or lacerate or lacerates or lacerated or laceration or lacerations or perforation or perforations or perforate or perforates or perforated or falls or falling or motor vehicle collision or motor vehicle collisions or motor vehicle accident or motor vehicle accidents or motor vehicle crash or car accident or car accidents or car crash or vehicular accident or vehicular accidents or vehicular collision or vehicular collisions or vehicular crash or traffic accident or traffic accidents or MVC or traffic crash or automobile crash or automobile collision or automobile collisions or automobile accident or gunshot or gun shot or firearm or firearms or stab or stabbed).ti,ab. |      |
| #17 | 3 and 15 and 16                                                                                                                                                                                                                                                                                                                                                                                                                                                                                                                                                                                                                                                                                                                                                                                                                                                                                                                                                                                                                                                                                                                                                                                                                                                                                                                                                                                                                                                                                                                                                                                                                                                                                                                                                                                                                                                                                                                                                                                                                               | 4228 |
| #18 | 17 and English language                                                                                                                                                                                                                                                                                                                                                                                                                                                                                                                                                                                                                                                                                                                                                                                                                                                                                                                                                                                                                                                                                                                                                                                                                                                                                                                                                                                                                                                                                                                                                                                                                                                                                                                                                                                                                                                                                                                                                                                                                       | 1978 |

**Search update:**

Search date: 2/25/2021

| Search Set          | Search Strategy                                                                                                                                                                                                                                                                                                                                                                                                                                                                                                                                                                                                                                                                                                                                                                                                                                                                                                                                                                           | Results |
|---------------------|-------------------------------------------------------------------------------------------------------------------------------------------------------------------------------------------------------------------------------------------------------------------------------------------------------------------------------------------------------------------------------------------------------------------------------------------------------------------------------------------------------------------------------------------------------------------------------------------------------------------------------------------------------------------------------------------------------------------------------------------------------------------------------------------------------------------------------------------------------------------------------------------------------------------------------------------------------------------------------------------|---------|
| #1<br><i>NSAIDs</i> | exp Anti-Inflammatory Agents, Non-Steroidal/ or exp Diclofenac/ or exp Apazone/ or exp Aspirin/ or exp Celecoxib/ or exp Ibuprofen/ or exp Diclofenac/ or exp Diflunisal/ or exp Etodolac/ or exp Fenoprofen/ or exp Flufenamic Acid/ or exp Indomethacin/ or exp Ketoprofen/ or exp Ketorolac/ or exp Meclofenamic Acid/ or exp Mefenamic Acid/ or exp Meloxicam/ or exp Nabumetone/ or exp Naproxen/ or exp Nefopam/ or exp Oxaprozin/ or exp Piroxicam/ or exp Phenylbutazone/ or exp Sulindac/ or exp Tolmetin/ or ("nonsteroid antiinflammatory agents" or "nonsteroid antiinflammatory agent" or "nonsteroid anti-inflammatory agents" or "nonsteroid anti-inflammatory agent" or "non-steroid antiinflammatory agents" or "non-steroid antiinflammatory agent" or "non-steroid anti-inflammatory agents" or "non-steroid anti-inflammatory agent" or "nonsteroidal antiinflammatory agents" or "nonsteroidal antiinflammatory agent" or "nonsteroidal anti-inflammatory agents" or | 46983   |

|                              |                                                                                                                                                                                                                                                                                                                                                                                                                                                                                                                                                                                                                                                                                                                                                                                                                                                                                                                                                                                                                                                                                                                                                                                                                                                                                                                                                                                                                                                                                                                                                                                                                                                                                                                                                                                                                  |              |
|------------------------------|------------------------------------------------------------------------------------------------------------------------------------------------------------------------------------------------------------------------------------------------------------------------------------------------------------------------------------------------------------------------------------------------------------------------------------------------------------------------------------------------------------------------------------------------------------------------------------------------------------------------------------------------------------------------------------------------------------------------------------------------------------------------------------------------------------------------------------------------------------------------------------------------------------------------------------------------------------------------------------------------------------------------------------------------------------------------------------------------------------------------------------------------------------------------------------------------------------------------------------------------------------------------------------------------------------------------------------------------------------------------------------------------------------------------------------------------------------------------------------------------------------------------------------------------------------------------------------------------------------------------------------------------------------------------------------------------------------------------------------------------------------------------------------------------------------------|--------------|
|                              | <p>"nonsteroidal anti-inflammatory agent" or "non-steroidal antiinflammatory agents" or "non-steroidal antiinflammatory agent" or "non-steroidal anti-inflammatory agents" or "non-steroidal anti-inflammatory agent" or "nonsteroid antiinflammatory drugs" or "nonsteroid anti-inflammatory drug" or "nonsteroid anti-inflammatory drugs" or "nonsteroid anti-inflammatory drug" or non-steroid antiinflammatory drugs or "non-steroid antiinflammatory drug" or "non-steroid anti-inflammatory drugs" or "non-steroid anti-inflammatory drug" or "nonsteroidal antiinflammatory drugs" or "nonsteroidal antiinflammatory drug" or "nonsteroidal anti-inflammatory drugs" or "nonsteroidal anti-inflammatory drug" or "non-steroidal antiinflammatory drugs" or "non-steroidal antiinflammatory drug" or "non-steroidal anti-inflammatory drugs" or NSAID or NSAIDs or apazone or aspirin or "acetylsalicylic acid" or "salicylic acid" or salsalate or bromfenac or celecoxib or Celebrex or dexibuprofen or dexketoprofen or diclofenac or voltaren or aceclofenac or diflunisal or droxicam or etodolac or etoricoxib or fenoprofen or "flufenamic acid" or flurbiprofen or ibuprofen or ibuproxam or advil or motrin or indomethacin or indomethacin or Indocin or ketoprofen or ketorolac or toradol or loxoprofen or "Meclofenamate sodium" or "mefenamic acid" or "meclofenamic acid" or meloxicam or nabumetone or naproxen or aleve or anaprox or naprelan or naprosyn or nefopam or nimesulide or oxaprozin or parecoxib or piroxicam or phenylbutazone or salsalate or sulindac or tenoxicam or "tiaprofenic acid" or "tolfenamic acid" or tolmetin).ti.ab.</p>                                                                                                                                     |              |
| <p>#2<br/><i>Opioids</i></p> | <p>exp Analgesics, Opioid/ or exp Alfentanil/ or exp Alphaprodine/ or exp Butorphanol/ or exp Buprenorphine, Naloxone Drug Combination/ or exp Codeine/ or exp Dextromoramide/ or exp Dextropropoxyphene/ or exp Dihydromorphine/ or exp Diphenoxylate/ or exp Ethylketocyclazocine/ or exp Ethylmorphine/ or exp Fentanyl/ or exp Heroin/ or exp Hydrocodone/ or exp Levorphanol/ or exp Meperidine/ or exp Meptazinol/ or exp Methadone/ or exp Methadyl Acetate/ or exp Morphine/ or exp Nalbuphine/ or exp Opiate Alkaloids/ or exp Opium/ or exp Oxycodone/ or exp Oxymorphone/ or exp Pentazocine/ or exp Phenazocine/ or exp Phenoperidine/ or exp Pirinitramide/ or exp Promedol/ or exp Remifentanil/ or exp Sufentanil/ or exp Tapentadol/ or exp Tilidine/ or exp Tramadol/ or (Opioid or Opioids or Opiate or Opiates or Narcotic or Narcotics or Dihydroetorphine or Vicodin or acrylfentanyl or alfentanil or alphaprodine or "beta-casomorphin" or "beta-casomorphins" or Butorphanol or Beforal or Moradol or Stadol or Torbugesic or Dolorex or "Buprenorphine Naloxone" or Suboxone or carfentanil or Codeine or Ardinex or Isocodeine or crotonylfentanyl or cyclopropylfentanyl or deltorphin or dermorphin or desomorphine or krokodil or Dextromoramide or Pyrrolamidol or "D-Moramide" or Palfium or Dextropropoxyphene or Propoxyphene or Darvon or dezocine or dihydrocodeine or paramol or Rikodeine or Tiamon or Tosidrin or Contugesic or Dicodin or Paracodin or Paracodina or Dihydromorphine or Paramorfan or Paramorphan or Diphenoxylate or dynorphin or dynorphins or dinorphin or dinorphins or endomorphin or Enkephalin or eseroline or Ethylketocyclazocine or Ethylmorphine or Trachyl or Dionine or Etorphine or Ethorphine or Fentanyl or Phentanyl or Fentanest or</p> | <p>58373</p> |



|                               |                                                                                                                                                                                                                                                                                                                                                                                                                                                                                                                                                                                                                                                                                                                                                                                                                                                                                                                                                                                                                                                                                                                                                                                                                                                                                                                                                                                                                                                                                                                                                                                                                                                                                                                                                                                                                                                                                                                                                                                                                                                                                                                                                                                                                                                                                                                                                                                                                                                                                                                                                                                                                                                                                                                                                                                                                            |       |
|-------------------------------|----------------------------------------------------------------------------------------------------------------------------------------------------------------------------------------------------------------------------------------------------------------------------------------------------------------------------------------------------------------------------------------------------------------------------------------------------------------------------------------------------------------------------------------------------------------------------------------------------------------------------------------------------------------------------------------------------------------------------------------------------------------------------------------------------------------------------------------------------------------------------------------------------------------------------------------------------------------------------------------------------------------------------------------------------------------------------------------------------------------------------------------------------------------------------------------------------------------------------------------------------------------------------------------------------------------------------------------------------------------------------------------------------------------------------------------------------------------------------------------------------------------------------------------------------------------------------------------------------------------------------------------------------------------------------------------------------------------------------------------------------------------------------------------------------------------------------------------------------------------------------------------------------------------------------------------------------------------------------------------------------------------------------------------------------------------------------------------------------------------------------------------------------------------------------------------------------------------------------------------------------------------------------------------------------------------------------------------------------------------------------------------------------------------------------------------------------------------------------------------------------------------------------------------------------------------------------------------------------------------------------------------------------------------------------------------------------------------------------------------------------------------------------------------------------------------------------|-------|
|                               | <p>Sublimaze or Duragesic or Durogesic or Fentora or Heroin or Diacetylmorphine or Diamorphine or Diagesil or Diamorf or Hydrocodone or Hydrocodon or Dihydrocodeinone or Dicodid or Robidone or Hydrocon or Codinovo or Hycodan or Hycon or Hydromorphone or Dihydromorphinone or Hydromorphon or Palladone or Laudacon or Dilaudid or ketobemidone or cetobemidon or Levorphanol or levodroman or levorphan or levorphanol or lofentanil or lofentanyl or Meperidine or Pethidine or Isonipicain or Dolsin or Dolosal or Dolin or Operidine or Dolantin or Dolargan or Lidol or Lydol or Demerol or Dolcontral or Meptazinol or Metid or Methadone or Biodone or Dolophine or Metadol or Metasedin or Symoron or Methadose or Methex or Phenadone or Physeptone or Phymet or Pinadone or Amidone or Acetylmethadol or Alphacetylmethadol or Amidolacetate or Dimepheptanol or Levoacetylmethadol or Methadol or Acemethadone or Levomethadyl or Morphine or Morphia or "MS Contin" or Oramorph or Duramorph or Nalbuphine or Nubain or nocistatin or normethadone or Opium or Papaveretum or Omnopon or Pantopon or Oxycodone or Dihydrone or Oxycone or Dihydrohydroxycodone or Oxycodone or Eucodal or Theocodin or Oxycontin or Pancodine or Dinarkon or Oxiconum or Oxymorphone or Numorphan or Opana or paracymethadol or noracetylmethadol or Pentazocine or Lexir or Talwin or Fortral or Phenazocine or Phenethylazocine or Phenbenzozphan or Narphen or Phenoperidine or Fenoperidine or Lealgin or Operidine or Pirinitramide or Piritramid or Dipidolor or Dipydolor or Promedol or Dimethylmeperidine or Trimeperidine or Isopromedol or protopine or fumarine or Remifentanil or Ultiva or Sufentanil or Sulfentanyl or Sulfentanil or Sufenta or Tapentadol or Nucynta or Tilidine or Tilidate or Tilidin or Valoron or Valerone or Tramadol or Tramundin or biodalgic or Jutadol or Nobligan or Prontofort or Zytram or Takadol or Theradol or Tiral or Topalgic or Tradol or Tradolpuren or Tradonal or Tralgiol or Trama or TramaDorsch or Biokanol or Tramabeta or Tramadin or Tramadoc or Ranitidin or Trasedal or Ultram or Xymel or Zamudol or Zumalgic or Zydol or Tramadura or Tramagetic or Tramagit or Tramaake or Tramal or Tramex or Adolonta or Contramal or Amadol or Skudexa Abstral or Actiq or Anexsia or Avinza or Butrans or co-gesic or Demerol or Dolophine or embeda or Exalgo or Fentora or hycet or hydromet or Hysingla or Kadian or liquicet or Lorcet or Lortab or Norco or Nucynta or Onsolis or Oramorph or oxycet or Oxaydo or Oxycontin or Percocet or Percodan or rezira or Roxanol or Roxicet or sublimaze or targiniq or tussionex or tuzistra or xtampza or Vicodin or vicoprofen or vituz or xartemis or xodol or Zohydro or zolvit or zutripro or zydone).ti,ab.</p> |       |
| #3                            | 1 or 2                                                                                                                                                                                                                                                                                                                                                                                                                                                                                                                                                                                                                                                                                                                                                                                                                                                                                                                                                                                                                                                                                                                                                                                                                                                                                                                                                                                                                                                                                                                                                                                                                                                                                                                                                                                                                                                                                                                                                                                                                                                                                                                                                                                                                                                                                                                                                                                                                                                                                                                                                                                                                                                                                                                                                                                                                     | 98642 |
| #4<br><i>Ortho procedures</i> | exp Orthopedic Procedures/ or exp Ulnar Collateral Ligament Reconstruction/ or exp Acetabuloplasty/ or exp Amputation/ or exp Disarticulation/ or exp Hemipelvectomy/ or exp Arthrodesis/ or exp Arthroplasty/ or exp Anterior Cruciate Ligament Reconstruction/ or exp Bone-Patellar Tendon-Bone Grafting/ or exp Arthroplasty, Subchondral/ or exp Posterior Cruciate Ligament Reconstruction/ or exp Arthroscopy/ or exp Joint Capsule Release/ or exp Bone lengthening/ or exp Ilizarov Technique/ or exp Osteogenesis, Distraction/ or exp Bone Transplantation/ or exp Fracture Fixation/ or                                                                                                                                                                                                                                                                                                                                                                                                                                                                                                                                                                                                                                                                                                                                                                                                                                                                                                                                                                                                                                                                                                                                                                                                                                                                                                                                                                                                                                                                                                                                                                                                                                                                                                                                                                                                                                                                                                                                                                                                                                                                                                                                                                                                                         | 28138 |

|    |                                                                                                                                                                                                                                                                                                                                                                                                                                                                                                                                                                                                                                                                                                                                                                                                                                                                                                                                                                                                                                                                                                                                                                                                                                                                                                                                                                                                                                     |        |
|----|-------------------------------------------------------------------------------------------------------------------------------------------------------------------------------------------------------------------------------------------------------------------------------------------------------------------------------------------------------------------------------------------------------------------------------------------------------------------------------------------------------------------------------------------------------------------------------------------------------------------------------------------------------------------------------------------------------------------------------------------------------------------------------------------------------------------------------------------------------------------------------------------------------------------------------------------------------------------------------------------------------------------------------------------------------------------------------------------------------------------------------------------------------------------------------------------------------------------------------------------------------------------------------------------------------------------------------------------------------------------------------------------------------------------------------------|--------|
|    | exp Closed fracture reduction/ or exp Fracture Fixation, Internal/ or exp Open fracture reduction/ or exp Limb salvage/ or exp Meniscectomy/ or exp Osteotomy/ or exp Alveolar Bone Grafting/ or exp Tenodesis/ or exp Tenotomy/ or (orthopedic or orthopedics or orthopaedic or orthopaedics or acetabuloplasty or acetabuloplasties or amputation or amputations or amputate or amputates or amputated or amputating or hemipelvectomy or hemipelvectomy or arthrodesis or arthrodeses or arthroplasties or hemiarthroplasty or hemiarthroplasties or bone grafting or arthroscopy or arthroscopies or arthroscopic or joint capsule release or bone lengthening or Ilizarov Technique or Ilizarov Method or distraction osteogenesis or bone transplantation or bone transplant or bone transplants).ti,ab.                                                                                                                                                                                                                                                                                                                                                                                                                                                                                                                                                                                                                      |        |
| #5 | (fracture or fractures or meniscectomy or meniscectomies or osteotomy or osteotomies or tenodesis or tenodeses or tenotomy or tenotomies or tendon release).ti,ab.                                                                                                                                                                                                                                                                                                                                                                                                                                                                                                                                                                                                                                                                                                                                                                                                                                                                                                                                                                                                                                                                                                                                                                                                                                                                  | 23963  |
| #6 | (fixation or fixations or reduction or reductions).ti,ab.                                                                                                                                                                                                                                                                                                                                                                                                                                                                                                                                                                                                                                                                                                                                                                                                                                                                                                                                                                                                                                                                                                                                                                                                                                                                                                                                                                           | 189855 |
| #7 | 5 and 6                                                                                                                                                                                                                                                                                                                                                                                                                                                                                                                                                                                                                                                                                                                                                                                                                                                                                                                                                                                                                                                                                                                                                                                                                                                                                                                                                                                                                             | 6827   |
| #8 | (cranial or cranium or jaw or mandible or maxillofacial or maxilla-mandibular or orthognathic or vertebrae or vertebral or lumbar or thoracic or cervical or ilium or ilial or iliac wing or ischial or ischium or sacral or sacrum or pelvic or pelvis or pubis or symphysis or acetabulum or acetabular or ankle or ankles or calcaneus or foot or feet or midfoot or forefoot or femur or femurs or femoral or tibia or tibias or fibula or fibulas or tibial or knee or knees or patella or patellar or hip or hips or intervertebral or atlanto-axial or gleno-humeral or glenohumeral or shoulder or shoulders or humerus or humeral or ulnar or ulna or radius or radial or forearm or forearms or scapula or scapulas or scapular or costal or intracostal or intercostal or clavicle or clavicles or clavicular or sternum or sternums or sternal or elbow or elbows or wrist or wrists or hand or hands or interphalangeal or interphalangeal or tarsal or tarsals or metatarsal or metatarsals or carpal or phalanges or bone or bones or skeletal or skeleton or skeletons or fracture or fractures or intramedullary or joint or joints or limb or limbs or costochondral or cartilage or rib or ribs or talus or talar or metacarpal or carpal or tendon or tendons or ligament or ligaments or muscle or muscles or ACL or meniscus or meniscal or intraarticular or intra-articular or synovial or synovium).ti,ab. | 291726 |
| #9 | (electrosurgery or electrosurgeries or electrosurgical or radiosurgery or radiosurgeries or radiosurgical or surgery or surgeries or surgical or operative or operation or operations or dissect or dissected or dissection or dissections or dissecting or microdissect or microdissected or microdissection or microdissections or microdissecting or cauter or cauterization or cauterizations or cauterize or cauterizes or cauterized or transplant or transplants or transplanting or transplanted or transplantation or implant or implants or implanted or implanting or implantation or implantations or graft or grafted or grafts or grafting or homograft or homografted or homografts or homografting or allograft or allografts or allografting or allografted or xenograft or xenografts or xenografted or xenografting or autograft or autografts or autografted or autografting or prostheses or prosthesis or prosthetic or bypass or rod or rods or intramedullary nail or intramedullary nails or IM nail or IM nails or cephalomedullary nail or cephalomedullary nails or screw or screws or pin or pins or cage or                                                                                                                                                                                                                                                                                           | 501035 |

|                                      |                                                                                                                                                                                                                                                                                                                                                                                                                                                                                                                                                                                                                                                                                                                                                                                                                                                                                                                                                                                                                                                                                                                                                                                                                                                                                                                                               |        |
|--------------------------------------|-----------------------------------------------------------------------------------------------------------------------------------------------------------------------------------------------------------------------------------------------------------------------------------------------------------------------------------------------------------------------------------------------------------------------------------------------------------------------------------------------------------------------------------------------------------------------------------------------------------------------------------------------------------------------------------------------------------------------------------------------------------------------------------------------------------------------------------------------------------------------------------------------------------------------------------------------------------------------------------------------------------------------------------------------------------------------------------------------------------------------------------------------------------------------------------------------------------------------------------------------------------------------------------------------------------------------------------------------|--------|
|                                      | cages or diversion or drainage or drain or drained or draining or drains or debride or debrides or debridement or fuse or fused or fusing or fusion or fusions or traction or tractions or mobilization or mobilisation or manipulation or manipulations or revascularize or revascularized or revascularization or revascularizations or revascularizes or replacement or replacements or lengthen or lengthens or lengthening or distraction or fixation or fixations or fixate or fixated or fixating or nonunion or ORIF or reduction or reductions or salvage or salvages or salvaging or reconstruct or reconstructs or reconstruction or reconstructions or reconstructed or harvest or harvests or harvested or harvesting).ti,ab.                                                                                                                                                                                                                                                                                                                                                                                                                                                                                                                                                                                                    |        |
| #10                                  | 8 and 9                                                                                                                                                                                                                                                                                                                                                                                                                                                                                                                                                                                                                                                                                                                                                                                                                                                                                                                                                                                                                                                                                                                                                                                                                                                                                                                                       | 124395 |
| #11                                  | 4 or 7 or 10                                                                                                                                                                                                                                                                                                                                                                                                                                                                                                                                                                                                                                                                                                                                                                                                                                                                                                                                                                                                                                                                                                                                                                                                                                                                                                                                  | 132968 |
| #12                                  | exp Pain/ or exp Pain management/ or (pain or pains or painful).ti,ab.                                                                                                                                                                                                                                                                                                                                                                                                                                                                                                                                                                                                                                                                                                                                                                                                                                                                                                                                                                                                                                                                                                                                                                                                                                                                        | 183833 |
| #13                                  | exp Musculoskeletal System/ or exp Extremities/ or exp Bones of Lower Extremity/ or exp Lower Extremity/ or exp Upper Extremity/ or exp Bones of Upper Extremity/ or (musculoskeletal or MSK or cartilage or cartilages or fibrocartilage or Fibrocartilages or fascia or fascial or ligament or ligaments or connective tissue or connective tissues or entheses or entheses or muscular or bone or bones or joint or joints or tendon or tendons or meniscus or meniscal or spine or spinal or low back or lower back or upper back or lumbar or vertebrae or vertebral or intervertebral or disc or discs or cervical or thoracic or pelvis or pelvic or neck or arm or arms or elbow or elbows or shoulder or shoulders or glenohumeral or glenohumerous or wrist or wrists hand or hands or carpal or metacarpal or palmar or interphalangeal or phalanges or finger or fingers or knuckle or knuckles or rotator or sacroiliac or rib or ribs or flank or flanks or diaphragm or clavicle or sternum or sternal or chest or hip or hips or leg or legs or knee or knees or ankle or ankles or foot or feet or tarsal or metatarsals or plantar or toe or toes or myofascial or tendon or tendons or jaw or jaws or mandible or mandibular or skull or skulls or cranium or cranial or extremity or extremities or limb or limbs).ti,ab. | 405515 |
| #14<br><i>MSK pain</i>               | 12 and 13                                                                                                                                                                                                                                                                                                                                                                                                                                                                                                                                                                                                                                                                                                                                                                                                                                                                                                                                                                                                                                                                                                                                                                                                                                                                                                                                     | 93705  |
| #15                                  | 11 or 14                                                                                                                                                                                                                                                                                                                                                                                                                                                                                                                                                                                                                                                                                                                                                                                                                                                                                                                                                                                                                                                                                                                                                                                                                                                                                                                                      | 189815 |
| #16<br><i>Trauma, ortho-specific</i> | "Wounds and Injuries"/ or exp Accidental Injuries/ or exp Amputation, Traumatic/ or exp Fractures, Bone/ or exp Ankle Fractures/ or exp Femoral Fractures/ or exp Fracture Dislocation/ or exp Fractures, Avulsion/ or exp Fractures, Closed/ or exp Fractures, Comminuted/ or exp Fractures, Compression/ or exp Fractures, Malunited/ or exp Fractures, Multiple/ or exp Fractures, Open/ or exp Fractures, Spontaneous/ or exp Fractures, Stress/ or exp Fractures, Ununited/ or exp Humeral Fractures/ or exp Intra-Articular Fractures/ or exp Osteoporotic Fractures/ or exp Periprosthetic Fractures/ or exp Radius Fractures/ or exp Rib Fractures/ or exp Shoulder Fractures/ or exp Skull Fractures/ or exp Spinal Fractures/ or exp Tibial Fractures/ or exp Ulna Fractures/ or exp Fractures, Cartilage/ or exp Arm Injuries/ or exp Forearm Injuries/ or exp Wrist Injuries/ or exp Athletic Injuries/ or exp Back Injuries/ or exp Spinal Injuries/ or exp Barotrauma/ or exp Blast Injuries/ or exp Crush Injuries/ or exp Hand Injuries/ or exp Finger Injuries/ or exp Hip Injuries/ or exp Hip Dislocation/ or exp                                                                                                                                                                                                          | 134089 |

|     |                                                                                                                                                                                                                                                                                                                                                                                                                                                                                                                                                                                                                                                                                                                                                                                                                                                                                                                                                                                                                                                                                                                                                                                                                                                                                                                                                                                                                                                                                                                                                                                                                                                                                                                                                                                                                                                                                                                                                                                                                                                                                                                                                                                          |      |
|-----|------------------------------------------------------------------------------------------------------------------------------------------------------------------------------------------------------------------------------------------------------------------------------------------------------------------------------------------------------------------------------------------------------------------------------------------------------------------------------------------------------------------------------------------------------------------------------------------------------------------------------------------------------------------------------------------------------------------------------------------------------------------------------------------------------------------------------------------------------------------------------------------------------------------------------------------------------------------------------------------------------------------------------------------------------------------------------------------------------------------------------------------------------------------------------------------------------------------------------------------------------------------------------------------------------------------------------------------------------------------------------------------------------------------------------------------------------------------------------------------------------------------------------------------------------------------------------------------------------------------------------------------------------------------------------------------------------------------------------------------------------------------------------------------------------------------------------------------------------------------------------------------------------------------------------------------------------------------------------------------------------------------------------------------------------------------------------------------------------------------------------------------------------------------------------------------|------|
|     | Joint Dislocations/ or exp Diastasis, Bone/ or exp Diastasis, Muscle/ or exp Patellar dislocation/ or exp Shoulder dislocation/ or exp Leg Injuries/ or exp Ankle Injuries/ or exp Foot injuries/ or exp Knee Injuries/ or exp Medial Tibial Stress Syndrome/ or exp Tibial Meniscus Injuries/ or exp Neck Injuries/ or exp Whiplash injuries/ or exp Shoulder Injuries/ or exp Rotator Cuff Injuries/ or exp Shoulder impingement syndrome/ or exp Microtrauma, Physical/ or exp Multiple Trauma/ or exp Trauma Centers/ or Wounds, Nonpenetrating/ or exp Wounds, Penetrating/ or exp "Sprains and Strains"/ or exp Cumulative Trauma Disorders/ or exp Tendon Injuries/ or exp Wounds, Gunshot/ or exp Wounds, Stab/ or exp Accidental Falls/ or exp Accidents, Traffic/ or (trauma or traumas or traumatic or polytrauma or barotrauma or injury or injuries or injured or injure or injuring or wound or wounds or wounded or dislocation or dislocations or dislocate or dislocates or dislocated or diastasis or rupture or ruptures or ruptured or impingement or impingements or disarticulation or disarticulations or disarticulated or disarticulate or disarticulates or disarticulating or sprain or sprains or sprained or tear or tears or torn or whiplash or blunt or crush or crushed or penetrate or penetrates or penetrating or penetrated or penetration or nonpenetrating or non penetrating or fracture or fractures or fractured or nonunion or malunited or lacerate or lacerates or lacerated or laceration or lacerations or perforation or perforations or perforate or perforates or perforated or falls or falling or motor vehicle collision or motor vehicle collisions or motor vehicle accident or motor vehicle accidents or motor vehicle crash or car accident or car accidents or car crash or vehicular accident or vehicular accidents or vehicular collision or vehicular collisions or vehicular crash or traffic accident or traffic accidents or MVC or traffic crash or automobile crash or automobile collision or automobile collisions or automobile accident or gunshot or gun shot or firearm or firearms or stab or stabbed).ti,ab. |      |
| #17 | 3 and 15 and 16                                                                                                                                                                                                                                                                                                                                                                                                                                                                                                                                                                                                                                                                                                                                                                                                                                                                                                                                                                                                                                                                                                                                                                                                                                                                                                                                                                                                                                                                                                                                                                                                                                                                                                                                                                                                                                                                                                                                                                                                                                                                                                                                                                          | 4606 |
| #18 | 17 and English language                                                                                                                                                                                                                                                                                                                                                                                                                                                                                                                                                                                                                                                                                                                                                                                                                                                                                                                                                                                                                                                                                                                                                                                                                                                                                                                                                                                                                                                                                                                                                                                                                                                                                                                                                                                                                                                                                                                                                                                                                                                                                                                                                                  | 2122 |
| #19 | limit 18 to yr="2020 -Current"                                                                                                                                                                                                                                                                                                                                                                                                                                                                                                                                                                                                                                                                                                                                                                                                                                                                                                                                                                                                                                                                                                                                                                                                                                                                                                                                                                                                                                                                                                                                                                                                                                                                                                                                                                                                                                                                                                                                                                                                                                                                                                                                                           | 114  |

**Database: Web of Science Core Collection, 1900-2020 (via Clarivate)**

Search date: 3/19/2020

| Search Set | Search Strategy                                                                                                                                                                                                                                                                                                                                                                                                                                                                                                                                                                                                                                                                                                                                                                                        | Results |
|------------|--------------------------------------------------------------------------------------------------------------------------------------------------------------------------------------------------------------------------------------------------------------------------------------------------------------------------------------------------------------------------------------------------------------------------------------------------------------------------------------------------------------------------------------------------------------------------------------------------------------------------------------------------------------------------------------------------------------------------------------------------------------------------------------------------------|---------|
| #1         | TS=("nonsteroid antiinflammatory agents" or "nonsteroid antiinflammatory agent" or "nonsteroid anti-inflammatory agents" or "non-steroid antiinflammatory agents" or "non-steroid antiinflammatory agent" or "non-steroid anti-inflammatory agents" or "non-steroid anti-inflammatory agent" or "nonsteroidal antiinflammatory agents" or "nonsteroidal antiinflammatory agent" or "nonsteroidal anti-inflammatory agents" or "nonsteroidal anti-inflammatory agent" or "non-steroidal antiinflammatory agent" or "non-steroidal anti-inflammatory agents" or "non-steroidal antiinflammatory agent" or "non-steroidal anti-inflammatory agents" or "nonsteroid antiinflammatory drugs" or "nonsteroid antiinflammatory drug" or "nonsteroid anti-inflammatory drugs" or "nonsteroid anti-inflammatory | 216556  |

|    |                                                                                                                                                                                                                                                                                                                                                                                                                                                                                                                                                                                                                                                                                                                                                                                                                                                                                                                                                                                                                                                                                                                                                                                                                                                                                                                                                                                                                                                                                                                                                                                                                                                                                                                                                                                                                                                                                                                                                                                                                                                                                                                                                                                                                                                                                  |        |
|----|----------------------------------------------------------------------------------------------------------------------------------------------------------------------------------------------------------------------------------------------------------------------------------------------------------------------------------------------------------------------------------------------------------------------------------------------------------------------------------------------------------------------------------------------------------------------------------------------------------------------------------------------------------------------------------------------------------------------------------------------------------------------------------------------------------------------------------------------------------------------------------------------------------------------------------------------------------------------------------------------------------------------------------------------------------------------------------------------------------------------------------------------------------------------------------------------------------------------------------------------------------------------------------------------------------------------------------------------------------------------------------------------------------------------------------------------------------------------------------------------------------------------------------------------------------------------------------------------------------------------------------------------------------------------------------------------------------------------------------------------------------------------------------------------------------------------------------------------------------------------------------------------------------------------------------------------------------------------------------------------------------------------------------------------------------------------------------------------------------------------------------------------------------------------------------------------------------------------------------------------------------------------------------|--------|
|    | drug" or non-steroid antiinflammatory drugs or "non-steroid antiinflammatory drug" or "non-steroid anti-inflammatory drugs" or "non-steroid anti-inflammatory drug" or "nonsteroidal antiinflammatory drugs" or "nonsteroidal antiinflammatory drug" or "nonsteroidal anti-inflammatory drugs" or "nonsteroidal anti-inflammatory drug" or "non-steroidal antiinflammatory drugs" or "non-steroidal antiinflammatory drug" or "non-steroidal anti-inflammatory drug" or NSAID or NSAIDs or apazone or aspirin or "acetylsalicylic acid" or "salicylic acid" or salsalate or bromfenac or celecoxib or Celebrex or dexibuprofen or dexketoprofen or diclofenac or voltaren or aceclofenac or diflunisal or droxicam or etodolac or etoricoxib or fenoprofen or "flufenamic acid" or flurbiprofen or ibuprofen or ibuprofen or ibuprofen or advil or motrin or indomethacin or indomethacin or Indocin or ketoprofen or ketorolac or toradol or loxoprofen or "Meclofenamate sodium" or "mefenamic acid" or "meclofenamic acid" or meloxicam or nabumetone or naproxen or aleve or anaprox or naprelan or naprosyn or nefopam or nimesulide or oxaprozin or parecoxib or piroxicam or phenylbutazone or salsalate or sulindac or tenoxicam or "tiaprofenic acid" or "tolfenamic acid" or tolmetin)                                                                                                                                                                                                                                                                                                                                                                                                                                                                                                                                                                                                                                                                                                                                                                                                                                                                                                                                                                                 |        |
| #2 | TS=(Opioid or Opioids or Opiate or Opiates or Narcotic or Narcotics or Dihydroetorphine or Vicodin or acrylfentanyl or alfentanil or alphaprodine or "beta-casomorphin" or "beta-casomorphins" or Butorphanol or Beforal or Moradol or Stadol or Torbugesic or Dolorex or "Buprenorphine Naloxone" or Suboxone or carfentanil or Codeine or Ardinex or Isocodeine or crotonylfentanyl or cyclopropylfentanyl or deltorphin or dermorphin or desomorphine or krokodil or Dextromoramide or Pyrrolamidol or "D-Moramide" or Palfium or Dextropropoxyphene or Propoxyphene or Darvon or dezocine or dihydrocodeine or paramol or Rikodeine or Tiamon or Tosidrin or Contugesic or Dicodin or Paracodin or Paracodina or Dihydromorphine or Paramorfan or Paramorphan or Diphenoxylate or dynorphin or dynorphins or dinorphin or dinorphins or endomorphin or Enkephalin or eseroline or Ethylketocyclazocine or Ethylmorphine or Trachyl or Dionine or Etorphine or Etorphine or Fentanyl or Phentanyl or Fentanest or Sublimaze or Duragesic or Durogesic or Fentora or Heroin or Diacetylmorphine or Diamorphine or Diagesil or Diamorf or Hydrocodone or Hydrocodon or Dihydrocodeinone or Dicodid or Robidone or Hydrocon or Codinovo or Hycodan or Hycon or Hydromorphone or Dihydromorphinone or Hydromorphon or Palladone or Laudacon or Dilaudid or ketobemidone or cetobemidon or Levorphanol or levodroman or levorphan or levorphanol or lofentanil or lofentanil or Meperidine or Pethidine or Isonipeccain or Dolsin or Dolosal or Dolin or Operidine or Dolantin or Dolargan or Lidol or Lydol or Demerol or Dolcontral or Meptazinol or Metid or Methadone or Biodone or Dolophine or Metadol or Metasedin or Symoron or Methadose or Methex or Phenadone or Physeptone or Phymet or Pinadone or Amidone or Acetylmethadol or Alphacetylmethadol or Amidolacetate or Dimepheptanol or Levoacetylmethadol or Methadol or Acemethadone or Levomethadyl or Morphine or Morphia or "MS Contin" or Oramorph or Duramorph or Nalbuphine or Nubain or nocistatin or normethadone or Opium or Papaveretum or Omnopon or Pantopon or Oxycodone or Dihydrone or Oxycone or Dihydrohydroxycodone or Oxycodone or Eucodal or Theocodin or Oxycontin or Pancodine or Dinarkon or | 230158 |

|    |                                                                                                                                                                                                                                                                                                                                                                                                                                                                                                                                                                                                                                                                                                                                                                                                                                                                                                                                                                                                                                                                                                                                                                                                                                                                                                                                                                                                                                                                                                                                                   |         |
|----|---------------------------------------------------------------------------------------------------------------------------------------------------------------------------------------------------------------------------------------------------------------------------------------------------------------------------------------------------------------------------------------------------------------------------------------------------------------------------------------------------------------------------------------------------------------------------------------------------------------------------------------------------------------------------------------------------------------------------------------------------------------------------------------------------------------------------------------------------------------------------------------------------------------------------------------------------------------------------------------------------------------------------------------------------------------------------------------------------------------------------------------------------------------------------------------------------------------------------------------------------------------------------------------------------------------------------------------------------------------------------------------------------------------------------------------------------------------------------------------------------------------------------------------------------|---------|
|    | Oxiconum or Oxymorphone or Numorphan or Opana or paracymethadol or noracetylmethadol or Pentazocine or Lexir or Talwin or Fortral or Phenazocine or Phenethylazocine or Phenbenzorphane or Narphen or Phenoperidine or Fenoperidine or Lealgin or Operidine or Pirinitramide or Piritramid or Dipidolor or Dipydolor or Promedol or Dimethylmeperidine or Trimeperidine or Isopromedol or protopine or fumarine or Remifentanil or Ultiva or Sufentanil or Sulfentanyl or Sulfentanil or Sufenta or Tapentadol or Nucynta or Tilidine or Tilidate or Tilidin or Valoron or Valerone or Tramadol or Tramundin or biodalgic or Jutadol or Nobligan or Prontofort or Zytram or Takadol or Theradol or Tiral or Topalgic or Tradol or Tradolpuren or Tradonal or Tralgiol or Trama or TramaDorsch or Biokanol or Tramabeta or Tramadin or Tramadoc or Ranitidin or Trasedal or Ultram or Xymel or Zamudol or Zumalgic or Zydol or Tramadura or Tramagetic or Tramagit or Tramake or Tramal or Tramex or Adolonta or Contramal or Amadol or Skudexa Abstral or Actiq or Anexsia or Avinza or Butrans or co-gesic or Demerol or Dolophine or embeda or Exalgo or Fentora or hycet or hydromet or Hysingla or Kadian or liquicet or Lorcet or Lortab or Norco or Nucynta or Onsolis or Oramorph or oxycet or Oxaydo or Oxycontin or Percocet or Percodan or rezira or Roxanol or Roxicet or sublimaze or targiniq or tussionex or tuzistra or xtampza or Vicodin or vicoprofen or vituz or xartemis or xodol or Zohydro or zolvit or zutripro or zydone) |         |
| #3 | #1 OR #2                                                                                                                                                                                                                                                                                                                                                                                                                                                                                                                                                                                                                                                                                                                                                                                                                                                                                                                                                                                                                                                                                                                                                                                                                                                                                                                                                                                                                                                                                                                                          | 437376  |
| #4 | TS=(orthopedic or orthopedics or orthopaedic or orthopaedics or acetabuloplasty or acetabuloplasties or amputation or amputations or amputate or amputates or amputated or amputating or hemipelvectomy or hemipelvectomies or arthrodesis or arthrodeses or arthroplasties or hemiarthroplasty or hemiarthroplasties or bone grafting or arthroscopy or arthroscopies or arthroscopic or joint capsule release or bone lengthening or Ilizarov Technique or Ilizarov Method or distraction osteogenesis or bone transplantation or bone transplant or bone transplants)                                                                                                                                                                                                                                                                                                                                                                                                                                                                                                                                                                                                                                                                                                                                                                                                                                                                                                                                                                          | 364525  |
| #5 | TS=(fracture or fractures or meniscectomy or meniscectomies or osteotomy or osteotomies or tenodesis or tenodeses or tenotomy or tenotomies or tendon release)                                                                                                                                                                                                                                                                                                                                                                                                                                                                                                                                                                                                                                                                                                                                                                                                                                                                                                                                                                                                                                                                                                                                                                                                                                                                                                                                                                                    | 542419  |
| #6 | TS=(fixation or fixations or reduction or reductions)                                                                                                                                                                                                                                                                                                                                                                                                                                                                                                                                                                                                                                                                                                                                                                                                                                                                                                                                                                                                                                                                                                                                                                                                                                                                                                                                                                                                                                                                                             | 2221605 |
| #7 | #5 AND #6                                                                                                                                                                                                                                                                                                                                                                                                                                                                                                                                                                                                                                                                                                                                                                                                                                                                                                                                                                                                                                                                                                                                                                                                                                                                                                                                                                                                                                                                                                                                         | 73,251  |
| #8 | TS=(cranial or cranium or jaw or mandible or maxillofacial or maxilla-mandibular or orthognathic or vertebrae or vertebral or lumbar or thoracic or cervical or ilium or ilial or iliac wing or ischial or ischium or sacral or sacrum or pelvic or pelvis or pubis or symphysis or acetabulum or acetabular or ankle or ankles or calcaneus or foot or feet or midfoot or forefoot or femur or femurs or femoral or tibia or tibias or fibula or fibulas or tibial or knee or knees or patella or patellar or hip or hips or intervertebral or atlanto-axial or gleno-humeral or glenohumeral or shoulder or shoulders or humerus or humeral or ulnar or ulna or radius or radial or forearm or forearms or scapula or scapulas or scapular or costal or intracostal or intercostal or clavicle or clavicles or clavicular or sternum or sternums or sternal or elbow or elbows or wrist or wrists or hand or hands or interphalangeal or inter-phalangeal or tarsal or tarsals or metatarsal or metatarsals or carpal or phalanges or bone or bones or skeletal or skeleton or skeletons or fracture or fractures or intramedullary or joint or joints or limb or limbs or costochondral or cartilage or rib or ribs or talus or talar or metacarpal or carpal or tendon or tendons or                                                                                                                                                                                                                                                          | 5103644 |



|     |                                                                                                                                                                                                                                                                                                                                                                                                                                                                                                                                                                                                                                                                                                                                                                                                                                                                                                                                                                                                                                                                                                                                                                                                                                                                                                                                                                                                                                                                                                                                                                                                                                                                                                                                                                                                                                                                                  |         |
|-----|----------------------------------------------------------------------------------------------------------------------------------------------------------------------------------------------------------------------------------------------------------------------------------------------------------------------------------------------------------------------------------------------------------------------------------------------------------------------------------------------------------------------------------------------------------------------------------------------------------------------------------------------------------------------------------------------------------------------------------------------------------------------------------------------------------------------------------------------------------------------------------------------------------------------------------------------------------------------------------------------------------------------------------------------------------------------------------------------------------------------------------------------------------------------------------------------------------------------------------------------------------------------------------------------------------------------------------------------------------------------------------------------------------------------------------------------------------------------------------------------------------------------------------------------------------------------------------------------------------------------------------------------------------------------------------------------------------------------------------------------------------------------------------------------------------------------------------------------------------------------------------|---------|
|     | ligament or ligaments or muscle or muscles or ACL or meniscus or meniscal or intraarticular or intra-articular or synovial or synovium)                                                                                                                                                                                                                                                                                                                                                                                                                                                                                                                                                                                                                                                                                                                                                                                                                                                                                                                                                                                                                                                                                                                                                                                                                                                                                                                                                                                                                                                                                                                                                                                                                                                                                                                                          |         |
| #9  | TS=(electrosurgery or electrosurgeries or electrosurgical or radiosurgery or radiosurgeries or radiosurgical or surgery or surgeries or surgical or operative or operation or operations or dissect or dissected or dissection or dissections or dissecting or microdissect or microdissected or microdissection or microdissections or microdissecting or cauter or cauterization or cauterizations or cauterize or cauterizes or cauterized or transplant or transplants or transplanting or transplanted or transplantation or implant or implants or implanted or implanting or implantation or implantations or graft or grafted or grafts or grafting or homograft or homografted or homografts or homografting or allograft or allografts or allografting or allografted or xenograft or xenografts or xenografted or xenografting or autograft or autografts or autografted or autografting or prostheses or prosthesis or prosthetic or bypass or rod or rods or intramedullary nail or intramedullary nails or IM nail or IM nails or cephalomedullary nail or cephalomedullary nails or screw or screws or pin or pins or cage or cages or diversion or drainage or drain or drained or draining or drains or debride or debrides or debridement or fuse or fused or fusing or fusion or fusions or traction or tractions or mobilization or mobilisation or manipulation or manipulations or revascularize or revascularized or revascularization or revascularizations or revascularizes or replacement or replacements or lengthen or lengthens or lengthening or distraction or fixation or fixations or fixate or fixated or fixating or nonunion or ORIF or reduction or reductions or salvage or salvages or salvaging or reconstruct or reconstructs or reconstruction or reconstructions or reconstructed or harvest or harvests or harvested or harvesting) | 8322678 |
| #10 | #8 AND #9                                                                                                                                                                                                                                                                                                                                                                                                                                                                                                                                                                                                                                                                                                                                                                                                                                                                                                                                                                                                                                                                                                                                                                                                                                                                                                                                                                                                                                                                                                                                                                                                                                                                                                                                                                                                                                                                        | 1416713 |
| #11 | #4 OR #7 OR #10                                                                                                                                                                                                                                                                                                                                                                                                                                                                                                                                                                                                                                                                                                                                                                                                                                                                                                                                                                                                                                                                                                                                                                                                                                                                                                                                                                                                                                                                                                                                                                                                                                                                                                                                                                                                                                                                  | 1492836 |
| #12 | TS= (pain or pains or painful)                                                                                                                                                                                                                                                                                                                                                                                                                                                                                                                                                                                                                                                                                                                                                                                                                                                                                                                                                                                                                                                                                                                                                                                                                                                                                                                                                                                                                                                                                                                                                                                                                                                                                                                                                                                                                                                   | 641299  |
| #13 | TS=(musculoskeletal or MSK or cartilage or cartilages or fibrocartilage or Fibrocartilages or fascia or fascial or ligament or ligaments or connective tissue or connective tissues or entheses or entheses or muscular or bone or bones or joint or joints or tendon or tendons or meniscus or meniscal or spine or spinal or low back or lower back or upper back or lumbar or vertebrae or vertebral or intervertebral or disc or discs or cervical or thoracic or pelvis or pelvic or neck or arm or arms or elbow or elbows or shoulder or shoulders or glenohumeral or glenohumerous or wrist or wrists hand or hands or carpal or metacarpal or palmar or interphalangeal or phalanges or finger or fingers or knuckle or knuckles or rotator or sacroiliac or rib or ribs or flank or flanks or diaphragm or clavicle or sternum or sternal or chest or hip or hips or leg or legs or knee or knees or ankle or ankles or foot or feet or tarsal or metatarsals or plantar or toe or toes or myofascial or tendon or tendons or jaw or jaws or mandible or mandibular or skull or skulls or cranium or cranial or extremity or extremities or limb or limbs)                                                                                                                                                                                                                                                                                                                                                                                                                                                                                                                                                                                                                                                                                                             | 4998451 |
| #14 | #12 AND #13                                                                                                                                                                                                                                                                                                                                                                                                                                                                                                                                                                                                                                                                                                                                                                                                                                                                                                                                                                                                                                                                                                                                                                                                                                                                                                                                                                                                                                                                                                                                                                                                                                                                                                                                                                                                                                                                      | 336757  |
| #15 | #11 OR #14                                                                                                                                                                                                                                                                                                                                                                                                                                                                                                                                                                                                                                                                                                                                                                                                                                                                                                                                                                                                                                                                                                                                                                                                                                                                                                                                                                                                                                                                                                                                                                                                                                                                                                                                                                                                                                                                       | 1708090 |
| #16 | TS=(trauma or traumas or traumatic or polytrauma or barotrauma or injury or injuries or injured or injure or injuring or wound or wounds or wounded or dislocation or dislocations or dislocate or dislocates or dislocated or diastasis or rupture or ruptures or ruptured or impingement                                                                                                                                                                                                                                                                                                                                                                                                                                                                                                                                                                                                                                                                                                                                                                                                                                                                                                                                                                                                                                                                                                                                                                                                                                                                                                                                                                                                                                                                                                                                                                                       | 3207828 |

|     |                                                                                                                                                                                                                                                                                                                                                                                                                                                                                                                                                                                                                                                                                                                                                                                                                                                                                                                                                                                                                                                                                                            |      |
|-----|------------------------------------------------------------------------------------------------------------------------------------------------------------------------------------------------------------------------------------------------------------------------------------------------------------------------------------------------------------------------------------------------------------------------------------------------------------------------------------------------------------------------------------------------------------------------------------------------------------------------------------------------------------------------------------------------------------------------------------------------------------------------------------------------------------------------------------------------------------------------------------------------------------------------------------------------------------------------------------------------------------------------------------------------------------------------------------------------------------|------|
|     | or impingements or disarticulation or disarticulations or disarticulated or disarticulate or disarticulates or disarticulating or sprain or sprains or sprained or tear or tears or torn or whiplash or blunt or crush or crushed or penetrate or penetrates or penetrating or penetrated or penetration or nonpenetrating or non penetrating or fracture or fractures or fractured or nonunion or malunited or lacerate or lacerates or lacerated or laceration or lacerations or perforation or perforations or perforate or perforates or perforated or falls or falling or motor vehicle collision or motor vehicle collisions or motor vehicle accident or motor vehicle accidents or motor vehicle crash or car accident or car accidents or car crash or vehicular accident or vehicular accidents or vehicular collision or vehicular collisions or vehicular crash or traffic accident or traffic accidents or MVC or traffic crash or automobile crash or automobile collision or automobile collisions or automobile accident or gunshot or gun shot or firearm or firearms or stab or stabbed) |      |
| #17 | #3 AND #15 AND #16                                                                                                                                                                                                                                                                                                                                                                                                                                                                                                                                                                                                                                                                                                                                                                                                                                                                                                                                                                                                                                                                                         | 9216 |
| #18 | #17 AND LANGUAGE: English                                                                                                                                                                                                                                                                                                                                                                                                                                                                                                                                                                                                                                                                                                                                                                                                                                                                                                                                                                                                                                                                                  | 8815 |
| #19 | #18 AND DOCUMENT TYPE: Article                                                                                                                                                                                                                                                                                                                                                                                                                                                                                                                                                                                                                                                                                                                                                                                                                                                                                                                                                                                                                                                                             | 7471 |

**Search update: Web of Science Core Collection, 1900-2021**

Search date: 2/25/2021

| Search Set | Search Strategy                                                                                                                                                                                                                                                                                                                                                                                                                                                                                                                                                                                                                                                                                                                                                                                                                                                                                                                                                                                                                                                                                                                                                                                                                                                                                                                                                                                                                                                                                                                                                                                                                                                                                                                                                                                                                                                                                                                                                                                     | Results |
|------------|-----------------------------------------------------------------------------------------------------------------------------------------------------------------------------------------------------------------------------------------------------------------------------------------------------------------------------------------------------------------------------------------------------------------------------------------------------------------------------------------------------------------------------------------------------------------------------------------------------------------------------------------------------------------------------------------------------------------------------------------------------------------------------------------------------------------------------------------------------------------------------------------------------------------------------------------------------------------------------------------------------------------------------------------------------------------------------------------------------------------------------------------------------------------------------------------------------------------------------------------------------------------------------------------------------------------------------------------------------------------------------------------------------------------------------------------------------------------------------------------------------------------------------------------------------------------------------------------------------------------------------------------------------------------------------------------------------------------------------------------------------------------------------------------------------------------------------------------------------------------------------------------------------------------------------------------------------------------------------------------------------|---------|
| #1         | TS=("nonsteroid antiinflammatory agents" or "nonsteroid antiinflammatory agent" or "nonsteroid anti-inflammatory agents" or "non-steroid antiinflammatory agents" or "non-steroid antiinflammatory agent" or "non-steroid anti-inflammatory agents" or "non-steroid anti-inflammatory agent" or "nonsteroidal antiinflammatory agents" or "nonsteroidal antiinflammatory agent" or "nonsteroidal anti-inflammatory agents" or "nonsteroidal anti-inflammatory agent" or "non-steroidal antiinflammatory agents" or "non-steroidal anti-inflammatory agents" or "non-steroidal antiinflammatory agent" or "non-steroidal anti-inflammatory agents" or "non-steroidal anti-inflammatory agent" or "nonsteroid antiinflammatory drugs" or "nonsteroid antiinflammatory drug" or "nonsteroid anti-inflammatory drugs" or "nonsteroid anti-inflammatory drug" or non-steroid antiinflammatory drugs or "non-steroid antiinflammatory drug" or "non-steroid anti-inflammatory drugs" or "non-steroid anti-inflammatory drug" or "nonsteroidal antiinflammatory drugs" or "nonsteroidal antiinflammatory drug" or "nonsteroidal anti-inflammatory drugs" or "nonsteroidal anti-inflammatory drug" or "non-steroidal antiinflammatory drugs" or "non-steroidal antiinflammatory drug" or "non-steroidal anti-inflammatory drugs" or "non-steroidal antiinflammatory drug" or NSAID or NSAIDs or apazone or aspirin or "acetylsalicylic acid" or "salicylic acid" or salsalate or bromfenac or celecoxib or Celebrex or dexibuprofen or dexketoprofen or diclofenac or voltaren or aceclofenac or diflunisal or droxicam or etodolac or etoricoxib or fenoprofen or "flufenamic acid" or flurbiprofen or ibuprofen or ibuproxam or advil or motrin or indomethacin or indomethacin or Indocin or ketoprofen or ketorolac or toradol or loxoprofen or "Meclofenamate sodium" or "mefenamic acid" or "meclofenamic acid" or meloxicam or nabumetone or naproxen or aleve or anaprox or naprelan or naprosyn or | 228133  |

|    |                                                                                                                                                                                                                                                                                                                                                                                                                                                                                                                                                                                                                                                                                                                                                                                                                                                                                                                                                                                                                                                                                                                                                                                                                                                                                                                                                                                                                                                                                                                                                                                                                                                                                                                                                                                                                                                                                                                                                                                                                                                                                                                                                                                                                                                                                                                                                                                                                                                                                                                                                                                                                                                                                                                                                                                                                                                                                                                                                                                                                                                                                                                                                                                                                                                                                                                                                                                         |        |
|----|-----------------------------------------------------------------------------------------------------------------------------------------------------------------------------------------------------------------------------------------------------------------------------------------------------------------------------------------------------------------------------------------------------------------------------------------------------------------------------------------------------------------------------------------------------------------------------------------------------------------------------------------------------------------------------------------------------------------------------------------------------------------------------------------------------------------------------------------------------------------------------------------------------------------------------------------------------------------------------------------------------------------------------------------------------------------------------------------------------------------------------------------------------------------------------------------------------------------------------------------------------------------------------------------------------------------------------------------------------------------------------------------------------------------------------------------------------------------------------------------------------------------------------------------------------------------------------------------------------------------------------------------------------------------------------------------------------------------------------------------------------------------------------------------------------------------------------------------------------------------------------------------------------------------------------------------------------------------------------------------------------------------------------------------------------------------------------------------------------------------------------------------------------------------------------------------------------------------------------------------------------------------------------------------------------------------------------------------------------------------------------------------------------------------------------------------------------------------------------------------------------------------------------------------------------------------------------------------------------------------------------------------------------------------------------------------------------------------------------------------------------------------------------------------------------------------------------------------------------------------------------------------------------------------------------------------------------------------------------------------------------------------------------------------------------------------------------------------------------------------------------------------------------------------------------------------------------------------------------------------------------------------------------------------------------------------------------------------------------------------------------------------|--------|
|    | nefopam or nimesulide or oxaprozin or parecoxib or piroxicam or phenylbutazone or salsalate or sulindac or tenoxicam or "tiaprofenic acid" or "tolfenamic acid" or tolmetin)                                                                                                                                                                                                                                                                                                                                                                                                                                                                                                                                                                                                                                                                                                                                                                                                                                                                                                                                                                                                                                                                                                                                                                                                                                                                                                                                                                                                                                                                                                                                                                                                                                                                                                                                                                                                                                                                                                                                                                                                                                                                                                                                                                                                                                                                                                                                                                                                                                                                                                                                                                                                                                                                                                                                                                                                                                                                                                                                                                                                                                                                                                                                                                                                            |        |
| #2 | TS=(Opioid or Opioids or Opiate or Opiates or Narcotic or Narcotics or Dihydroetorphine or Vicodin or acrylfentanyl or alfentanil or alphaprodine or "beta-casomorphin" or "beta-casomorphins" or Butorphanol or Beforal or Moradol or Stadol or Torbugesic or Dolorex or "Buprenorphine Naloxone" or Suboxone or carfentanil or Codeine or Ardinex or Isocodeine or crotonylfentanyl or cyclopropylfentanyl or deltorphin or dermorphin or desomorphine or krokodil or Dextromoramide or Pyrrolamidol or "D-Moramide" or Palfium or Dextropropoxyphene or Propoxyphene or Darvon or dezocine or dihydrocodeine or paramol or Rikodeine or Tiamon or Tosidrin or Contugesic or Dicodin or Paracodin or Paracodina or Dihydromorphine or Paramorfan or Paramorphan or Diphenoxylate or dynorphin or dynorphins or dinorphin or dinorphins or endomorphin or Enkephalin or eseroline or Ethylketocyclazocine or Ethylmorphine or Trachyl or Dionine or Etorphine or Etorphine or Fentanyl or Phentanyl or Fentanest or Sublimaze or Duragesic or Durogesic or Fentora or Heroin or Diacetylmorphine or Diamorphine or Diagesil or Diamorf or Hydrocodone or Hydrocodon or Dihydrocodeinone or Dicodid or Robidone or Hydrocon or Codinovo or Hycodan or Hycon or Hydromorphone or Dihydromorphinone or Hydromorphon or Palladone or Laudacon or Dilaudid or ketobemidone or cetobemidon or Levorphanol or levodroman or levorphan or levorphanol or lofentanil or lofentanil or Meperidine or Pethidine or Isonipeccain or Dolsin or Dolosal or Dolin or Operidine or Dolantin or Dolargan or Lidol or Lydol or Demerol or Dolcontral or Meptazinol or Metid or Methadone or Biodone or Dolophine or Metadol or Metasedin or Symoron or Methadose or Methex or Phenadone or Physeptone or Phymet or Pinadone or Amidone or Acetylmethadol or Alphacetylmethadol or Amidolacetate or Dimepheptanol or Levoacetylmethadol or Methadol or Acemethadone or Levomethadyl or Morphine or Morphia or "MS Contin" or Oramorph or Duramorph or Nalbuphine or Nubain or nocistatin or normethadone or Opium or Papaveretum or Omnopon or Pantopon or Oxycodone or Dihydrone or Oxycone or Dihydrohydroxycodone or Oxycodone or Eucodal or Theocodin or Oxycontin or Pancodine or Dinarkon or Oxiconum or Oxymorphone or Numorphan or Opana or paracymethadol or noracetylmethadol or Pentazocine or Lexir or Talwin or Fortral or Phenazocine or Phenethylazocine or Phenbenzorphin or Narphen or Phenoperidine or Fenoperidine or Lealgin or Operidine or Pirinitramide or Piritramid or Dipidolor or Dipydolor or Promedol or Dimethylmeperidine or Trimeperidine or Isopromedol or protopine or fumarine or Remifentanil or Ultiva or Sufentanil or Sulfentanil or Sufenta or Tapentadol or Nucynta or Tilidine or Tilidate or Tilidin or Valoron or Valerone or Tramadol or Tramundin or biodalgic or Jutadol or Nobligan or Prontofort or Zytram or Takadol or Theradol or Tiral or Topalgic or Tradol or Tradolpuren or Tradonal or Tralgiol or Trama or TramaDorsch or Biokanol or Tramabeta or Tramadin or Tramadoc or Ranitidin or Trasedal or Ultram or Xymel or Zamudol or Zumalgic or Zydol or Tramadura or Tramagetic or Tramagit or Tramake or Tramal or Tramex or Adolonta or Contramal or Amadol or Skudexa Abstral or Actiq or Anexsia or Avinza or Butrans or co-gesic or Demerol | 243428 |

|    |                                                                                                                                                                                                                                                                                                                                                                                                                                                                                                                                                                                                                                                                                                                                                                                                                                                                                                                                                                                                                                                                                                                                                                                                                                                                                                                                                                                                                                  |         |
|----|----------------------------------------------------------------------------------------------------------------------------------------------------------------------------------------------------------------------------------------------------------------------------------------------------------------------------------------------------------------------------------------------------------------------------------------------------------------------------------------------------------------------------------------------------------------------------------------------------------------------------------------------------------------------------------------------------------------------------------------------------------------------------------------------------------------------------------------------------------------------------------------------------------------------------------------------------------------------------------------------------------------------------------------------------------------------------------------------------------------------------------------------------------------------------------------------------------------------------------------------------------------------------------------------------------------------------------------------------------------------------------------------------------------------------------|---------|
|    | or Dolophine or embeda or Exalgo or Fentora or hycet or hydromet or Hysingla or Kadian or liquicet or Lorcet or Lortab or Norco or Nucynta or Onsolis or Oramorph or oxycet or Oxaydo or Oxycontin or Percocet or Percodan or rezira or Roxanol or Roxicet or sublimaze or targiniq or tussionex or tuzistra or xtampza or Vicodin or vicoprofen or vituz or xartemis or xodol or Zohydro or zolvit or zutripro or zydone)                                                                                                                                                                                                                                                                                                                                                                                                                                                                                                                                                                                                                                                                                                                                                                                                                                                                                                                                                                                                       |         |
| #3 | #1 OR #2                                                                                                                                                                                                                                                                                                                                                                                                                                                                                                                                                                                                                                                                                                                                                                                                                                                                                                                                                                                                                                                                                                                                                                                                                                                                                                                                                                                                                         | 461538  |
| #4 | TS=(orthopedic or orthopedics or orthopaedic or orthopaedics or acetabuloplasty or acetabuloplasties or amputation or amputations or amputate or amputates or amputated or amputating or hemipelvectomy or hemipelvectomies or arthrodesis or arthrodeses or arthroplasties or hemiarthroplasty or hemiarthroplasties or bone grafting or arthroscopy or arthroscopies or arthroscopic or joint capsule release or bone lengthening or Ilizarov Technique or Ilizarov Method or distraction osteogenesis or bone transplantation or bone transplant or bone transplants)                                                                                                                                                                                                                                                                                                                                                                                                                                                                                                                                                                                                                                                                                                                                                                                                                                                         | 386948  |
| #5 | TS=(fracture or fractures or meniscectomy or meniscectomies or osteotomy or osteotomies or tenodesis or tenodeses or tenotomy or tenotomies or tendon release)                                                                                                                                                                                                                                                                                                                                                                                                                                                                                                                                                                                                                                                                                                                                                                                                                                                                                                                                                                                                                                                                                                                                                                                                                                                                   | 581044  |
| #6 | TS=(fixation or fixations or reduction or reductions)                                                                                                                                                                                                                                                                                                                                                                                                                                                                                                                                                                                                                                                                                                                                                                                                                                                                                                                                                                                                                                                                                                                                                                                                                                                                                                                                                                            | 2393654 |
| #7 | #5 AND #6                                                                                                                                                                                                                                                                                                                                                                                                                                                                                                                                                                                                                                                                                                                                                                                                                                                                                                                                                                                                                                                                                                                                                                                                                                                                                                                                                                                                                        | 79280   |
| #8 | TS=(cranial or cranium or jaw or mandible or maxillofacial or maxilla-mandibular or orthognathic or vertebrae or vertebral or lumbar or thoracic or cervical or ilium or ilial or iliac wing or ischial or ischium or sacral or sacrum or pelvic or pelvis or pubis or symphysis or acetabulum or acetabular or ankle or ankles or calcaneus or foot or feet or midfoot or forefoot or femur or femurs or femoral or tibia or tibias or fibula or fibulas or tibial or knee or knees or patella or patellar or hip or hips or intervertebral or atlanto-axial or gleno-humeral or glenohumeral or shoulder or shoulders or humerus or humeral or ulnar or ulna or radius or radial or forearm or forearms or scapula or scapulas or scapular or costal or intracostal or intercostal or clavicle or clavicles or clavicular or sternum or sternums or sternal or elbow or elbows or wrist or wrists or hand or hands or interphalangeal or inter-phalangeal or tarsal or tarsals or metatarsal or metatarsals or carpal or phalanges or bone or bones or skeletal or skeleton or skeletons or fracture or fractures or intramedullary or joint or joints or limb or limbs or costochondral or cartilage or rib or ribs or talus or talar or metacarpal or carpal or tendon or tendons or ligament or ligaments or muscle or muscles or ACL or meniscus or meniscal or intraarticular or intra-articular or synovial or synovium) | 5419199 |
| #9 | TS=(electrosurgery or electrosurgeries or electrosurgical or radiosurgery or radiosurgeries or radiosurgical or surgery or surgeries or surgical or operative or operation or operations or dissect or dissected or dissection or dissections or dissecting or microdissect or microdissected or microdissection or microdissections or microdissecting or cauter or cauterization or cauterizations or cauterize or cauterizes or cauterized or transplant or transplants or transplanting or transplanted or transplantation or implant or implants or implanted or implanting or implantation or implantations or graft or grafted or grafts or grafting or homograft or homografted or homografts or homografting or allograft or allografts or allografting or allografted or xenograft or xenografts or xenografted or xenografting or autograft or autografts or autografted or autografting or prostheses or prosthesis or prosthetic or bypass or rod or rods or intramedullary nail or intramedullary nails or IM nail or IM nails or                                                                                                                                                                                                                                                                                                                                                                                  | 8914771 |

|     |                                                                                                                                                                                                                                                                                                                                                                                                                                                                                                                                                                                                                                                                                                                                                                                                                                                                                                                                                                                                                                                                                                                                                                                                                                                                                                                                                                                                       |         |
|-----|-------------------------------------------------------------------------------------------------------------------------------------------------------------------------------------------------------------------------------------------------------------------------------------------------------------------------------------------------------------------------------------------------------------------------------------------------------------------------------------------------------------------------------------------------------------------------------------------------------------------------------------------------------------------------------------------------------------------------------------------------------------------------------------------------------------------------------------------------------------------------------------------------------------------------------------------------------------------------------------------------------------------------------------------------------------------------------------------------------------------------------------------------------------------------------------------------------------------------------------------------------------------------------------------------------------------------------------------------------------------------------------------------------|---------|
|     | cephalomedullary nail or cephalomedullary nails or screw or screws or pin or pins or cage or cages or diversion or drainage or drain or drained or draining or drains or debride or debrides or debridement or fuse or fused or fusing or fusion or fusions or traction or tractions or mobilization or mobilisation or manipulation or manipulations or revascularize or revascularized or revascularization or revascularizations or revascularizes or replacement or replacements or lengthen or lengthens or lengthening or distraction or fixation or fixations or fixate or fixated or fixating or nonunion or ORIF or reduction or reductions or salvage or salvages or salvaging or reconstruct or reconstructs or reconstruction or reconstructions or reconstructed or harvest or harvests or harvested or harvesting)                                                                                                                                                                                                                                                                                                                                                                                                                                                                                                                                                                      |         |
| #10 | #8 AND #9                                                                                                                                                                                                                                                                                                                                                                                                                                                                                                                                                                                                                                                                                                                                                                                                                                                                                                                                                                                                                                                                                                                                                                                                                                                                                                                                                                                             | 1515047 |
| #11 | #4 OR #7 OR #10                                                                                                                                                                                                                                                                                                                                                                                                                                                                                                                                                                                                                                                                                                                                                                                                                                                                                                                                                                                                                                                                                                                                                                                                                                                                                                                                                                                       | 1596642 |
| #12 | TS= (pain or pains or painful)                                                                                                                                                                                                                                                                                                                                                                                                                                                                                                                                                                                                                                                                                                                                                                                                                                                                                                                                                                                                                                                                                                                                                                                                                                                                                                                                                                        | 694211  |
| #13 | TS=(musculoskeletal or MSK or cartilage or cartilages or fibrocartilage or Fibrocartilages or fascia or fascial or ligament or ligaments or connective tissue or connective tissues or enthesis or entheses or muscular or bone or bones or joint or joints or tendon or tendons or meniscus or meniscal or spine or spinal or low back or lower back or upper back or lumbar or vertebrae or vertebral or intervertebral or disc or discs or cervical or thoracic or pelvis or pelvic or neck or arm or arms or elbow or elbows or shoulder or shoulders or glenohumeral or glenohumerous or wrist or wrists hand or hands or carpal or metacarpal or palmar or interphalangeal or phalanges or finger or fingers or knuckle or knuckles or rotator or sacroiliac or rib or ribs or flank or flanks or diaphragm or clavicle or sternum or sternal or chest or hip or hips or leg or legs or knee or knees or ankle or ankles or foot or feet or tarsal or metatarsals or plantar or toe or toes or myofascial or tendon or tendons or jaw or jaws or mandible or mandibular or skull or skulls or cranium or cranial or extremity or extremities or limb or limbs)                                                                                                                                                                                                                                  | 5321249 |
| #14 | #12 AND #13                                                                                                                                                                                                                                                                                                                                                                                                                                                                                                                                                                                                                                                                                                                                                                                                                                                                                                                                                                                                                                                                                                                                                                                                                                                                                                                                                                                           | 364490  |
| #15 | #11 OR #14                                                                                                                                                                                                                                                                                                                                                                                                                                                                                                                                                                                                                                                                                                                                                                                                                                                                                                                                                                                                                                                                                                                                                                                                                                                                                                                                                                                            | 1828378 |
| #16 | TS=(trauma or traumas or traumatic or polytrauma or barotrauma or injury or injuries or injured or injure or injuring or wound or wounds or wounded or dislocation or dislocations or dislocate or dislocates or dislocated or diastasis or rupture or ruptures or ruptured or impingement or impingements or disarticulation or disarticulations or disarticulated or disarticulate or disarticulates or disarticulating or sprain or sprains or sprained or tear or tears or torn or whiplash or blunt or crush or crushed or penetrate or penetrates or penetrating or penetrated or penetration or nonpenetrating or non penetrating or fracture or fractures or fractured or nonunion or malunited or lacerate or lacerates or lacerated or laceration or lacerations or perforation or perforations or perforate or perforates or perforated or falls or falling or motor vehicle collision or motor vehicle collisions or motor vehicle accident or motor vehicle accidents or motor vehicle crash or car accident or car accidents or car crash or vehicular accident or vehicular accidents or vehicular collision or vehicular collisions or vehicular crash or traffic accident or traffic accidents or MVC or traffic crash or automobile crash or automobile collision or automobile collisions or automobile accident or gunshot or gun shot or firearm or firearms or stab or stabbed) | 3439338 |
| #17 | #3 AND #15 AND #16                                                                                                                                                                                                                                                                                                                                                                                                                                                                                                                                                                                                                                                                                                                                                                                                                                                                                                                                                                                                                                                                                                                                                                                                                                                                                                                                                                                    | 9920    |

|     |                                |      |
|-----|--------------------------------|------|
| #18 | #17 AND LANGUAGE: English      | 9501 |
| #19 | #18 AND DOCUMENT TYPE: Article | 9279 |
| #20 | #19 AND IC Timespan=2020-2021  | 840  |
